# Supplementary material
Source: publisher figshare collection journal article supplement (https://acs.figshare.com/ndownloader/files/4989079)

# **Uniting C1-Ammonium Enolates and Transition Metal Electrophiles via Cooperative Catalysis: The Direct, Asymmetric $\alpha$ -Allylation of Aryl Acetic Acid Esters.**

Kevin J. Schwarz, Jessica L. Amos, J. Cullen Klein, Dung T. Do; Thomas N. Snaddon\*

Department of Chemistry, Indiana University, 800 E. Kirkwood Ave., Bloomington, Indiana 47405, United States.

Corresponding Author: [tsnaddon@indiana.edu](mailto:tsnaddon@indiana.edu)

**NMR spectra**

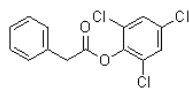

2,4,6-Trichlorophenyl 2-phenylacetate (2)

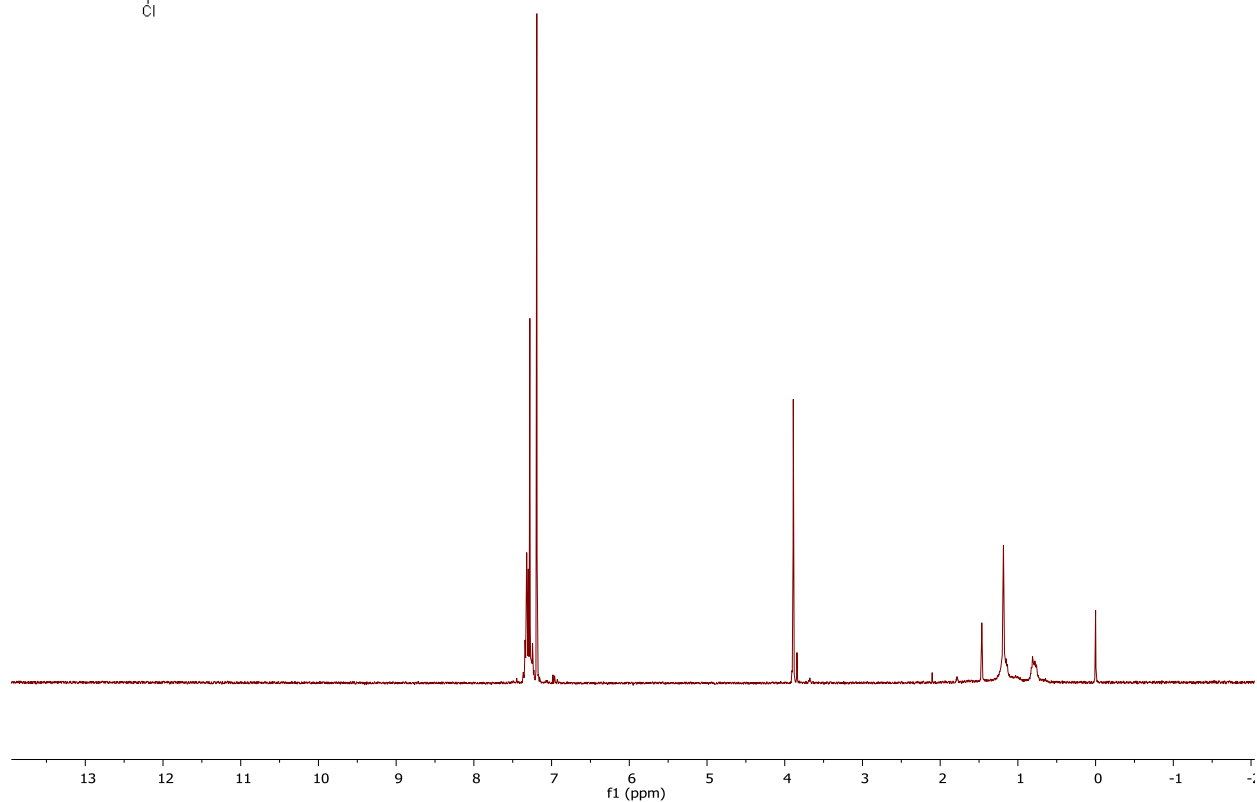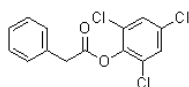

2,4,6-Trichlorophenyl 2-phenylacetate (2)

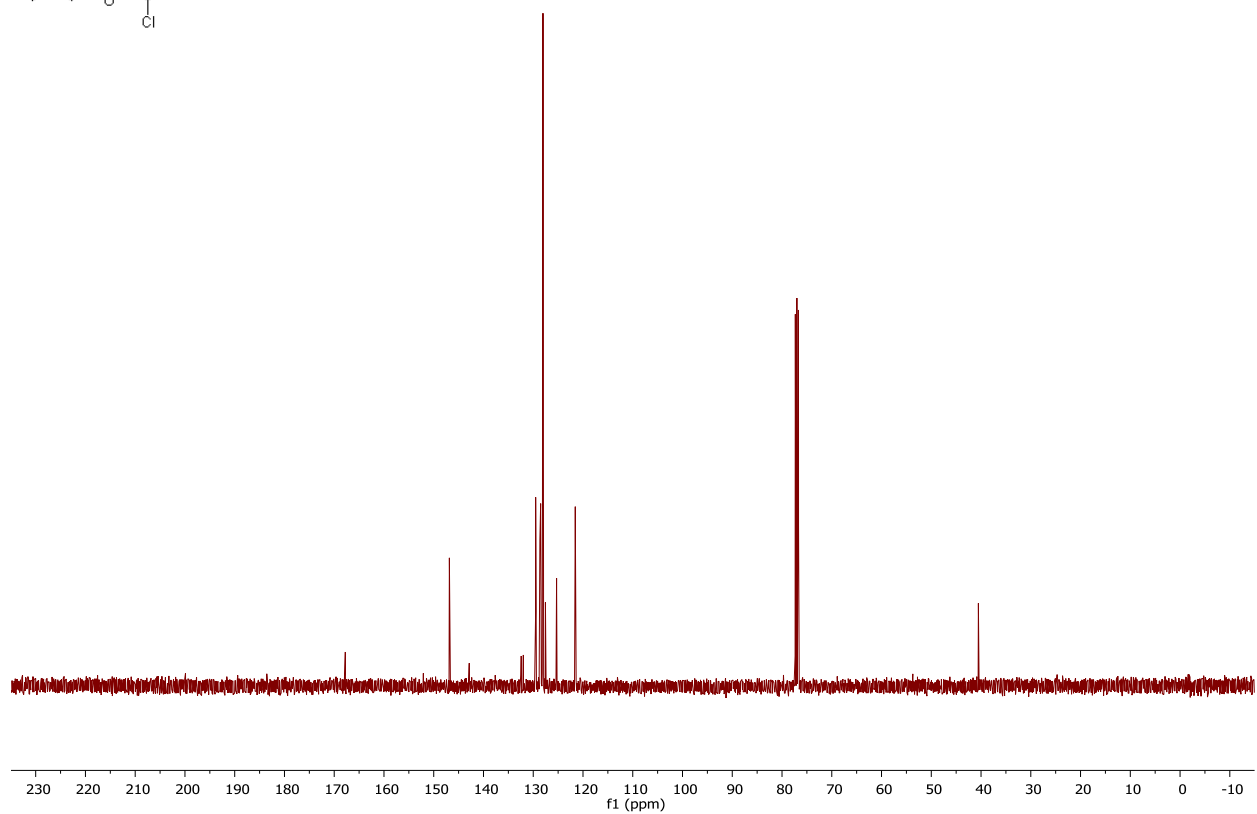

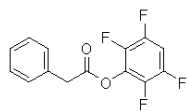

2,3,5,6-Tetrafluorophenyl 2-phenylacetate (3)

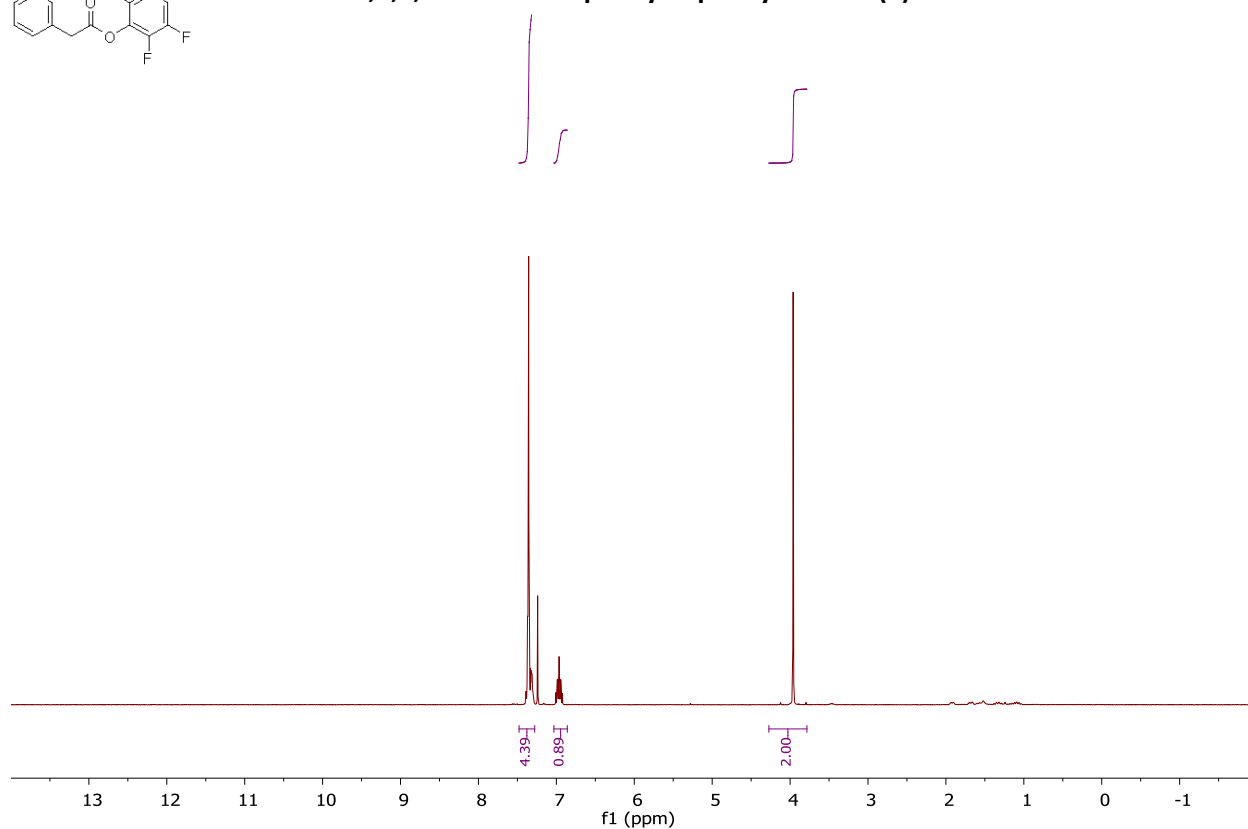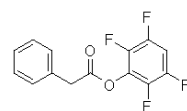

2,3,5,6-Tetrafluorophenyl 2-phenylacetate (3)

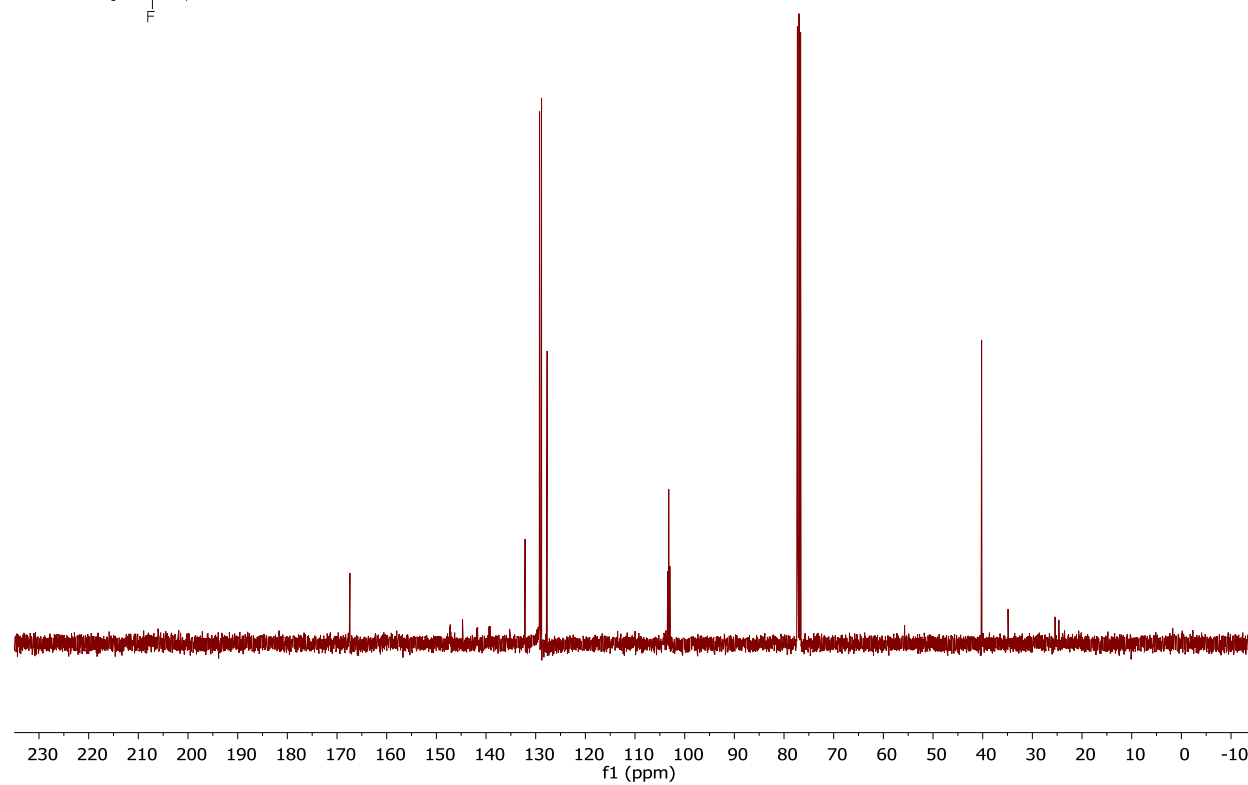

### 2,3,5,6-Tetrafluorophenyl 2-phenylacetate (3)

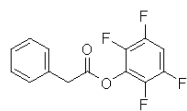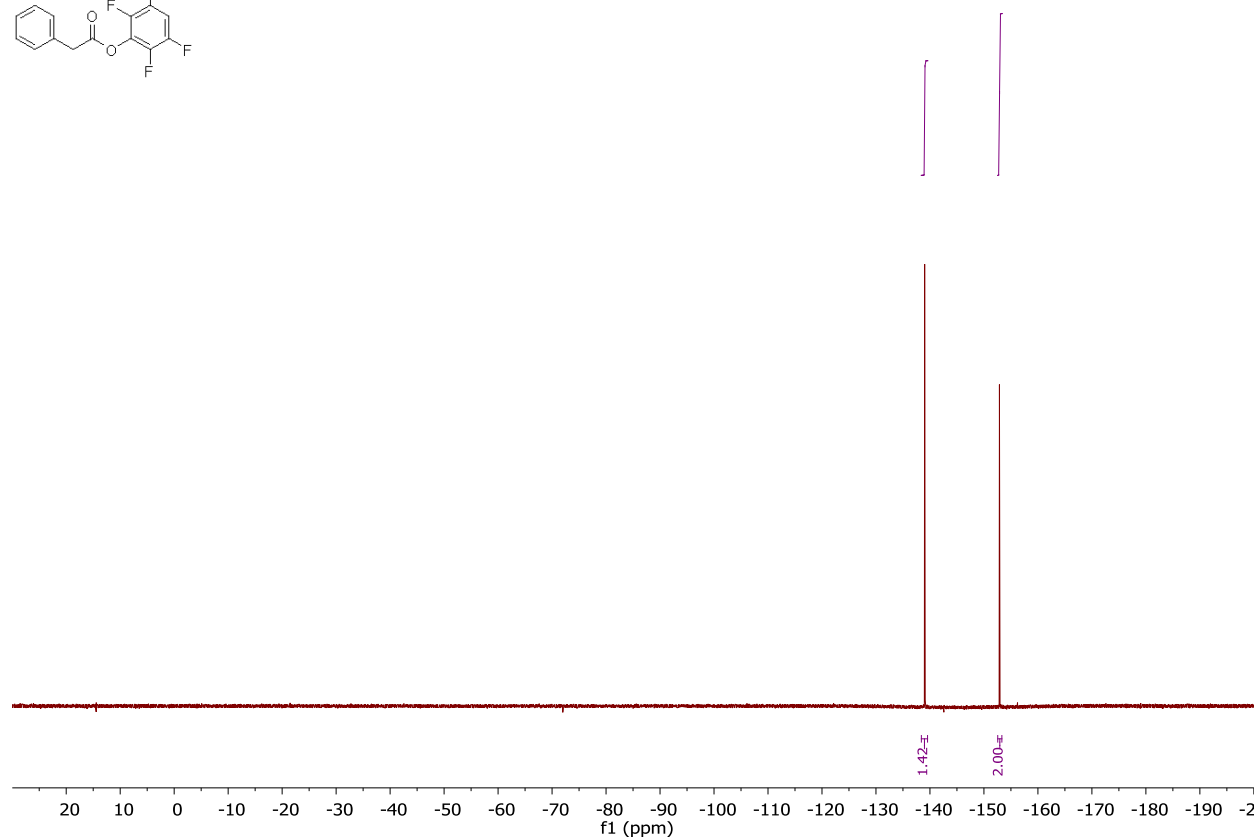

### Pentafluorophenyl 2-phenylacetate (4)

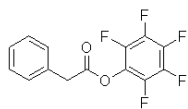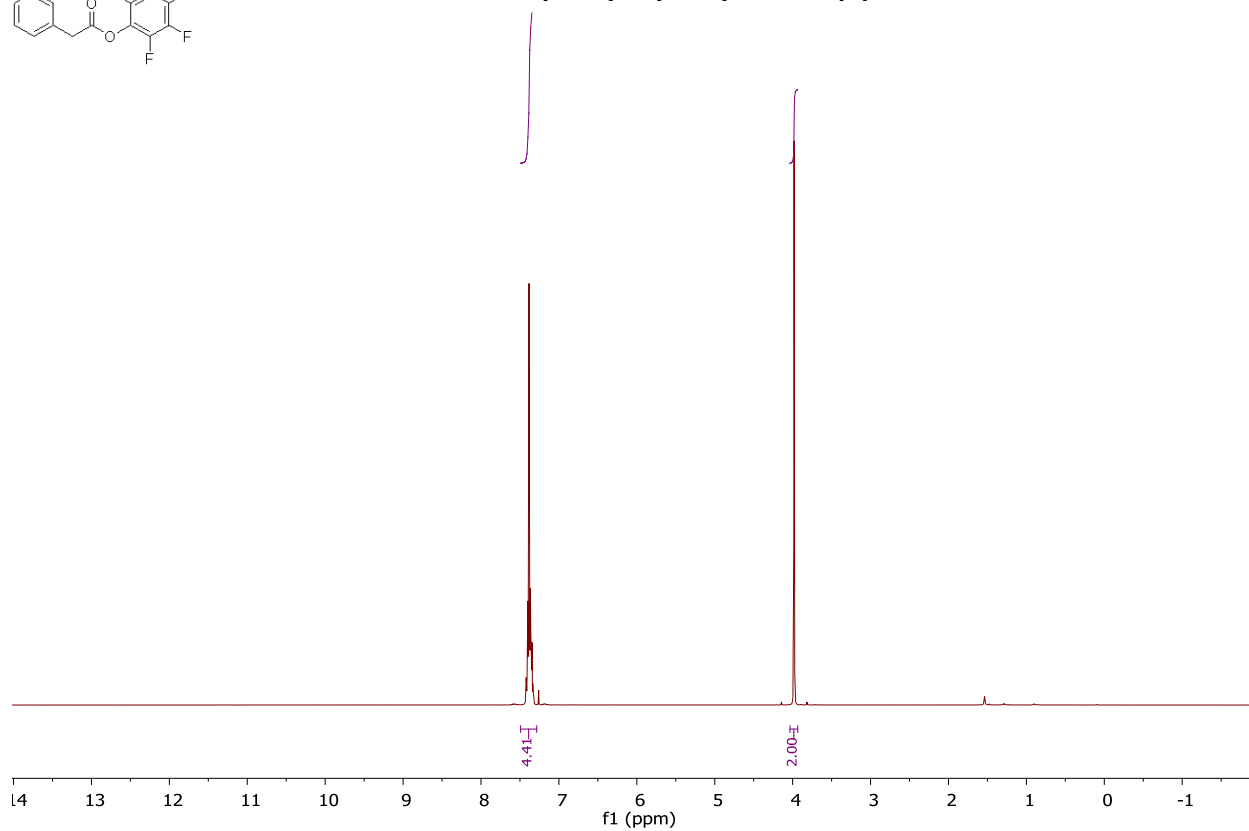

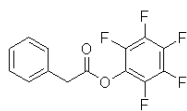

Pentafluorophenyl 2-phenylacetate (4)

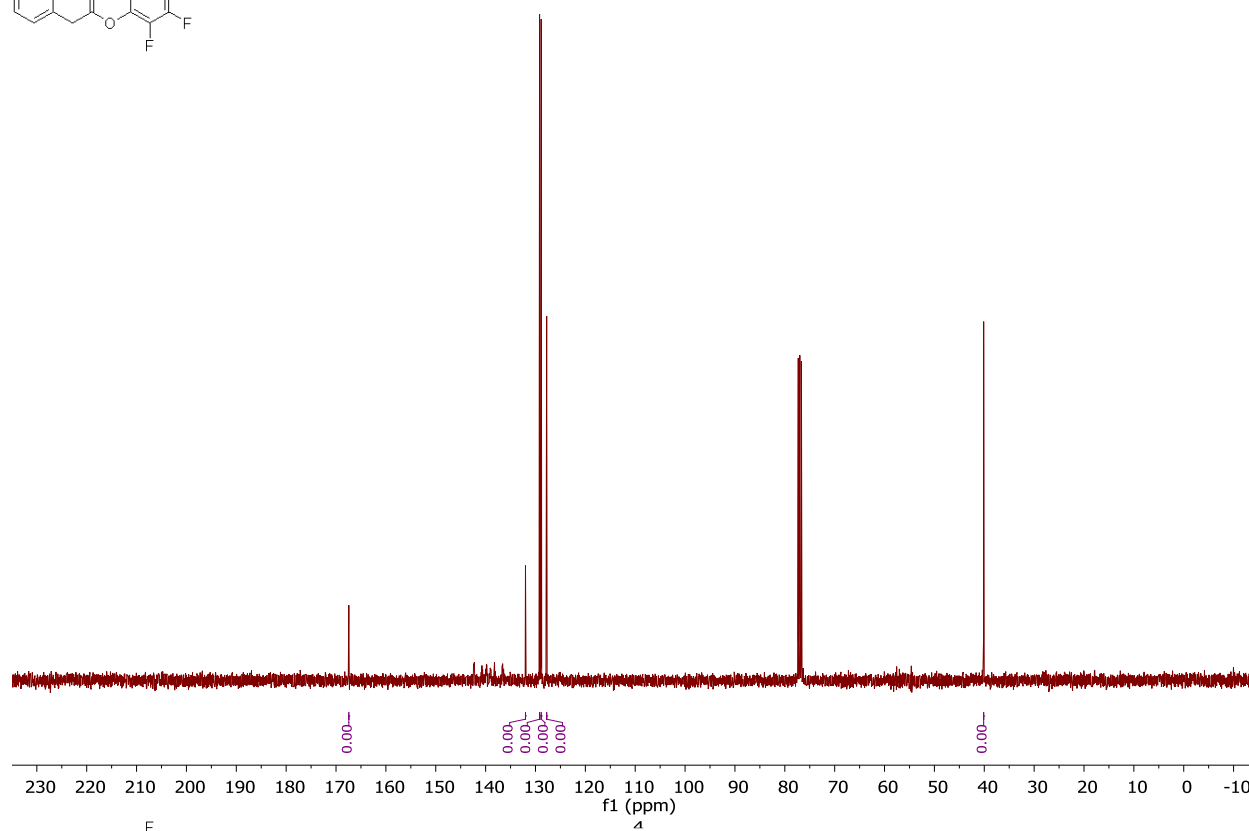

Pentafluorophenyl 2-phenylacetate (4)

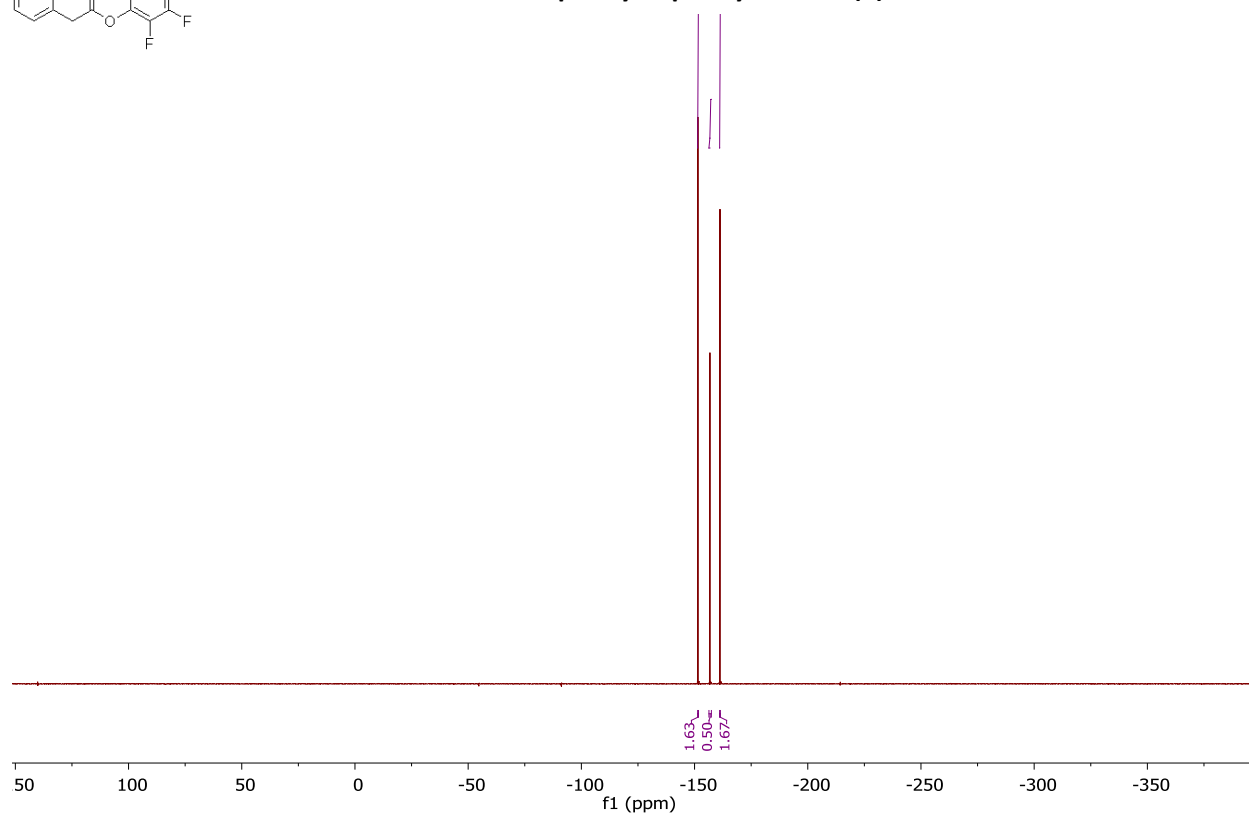

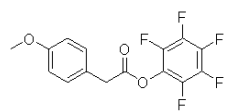

Pentafluorophenyl 2-(4-methoxyphenyl)acetate (S8)

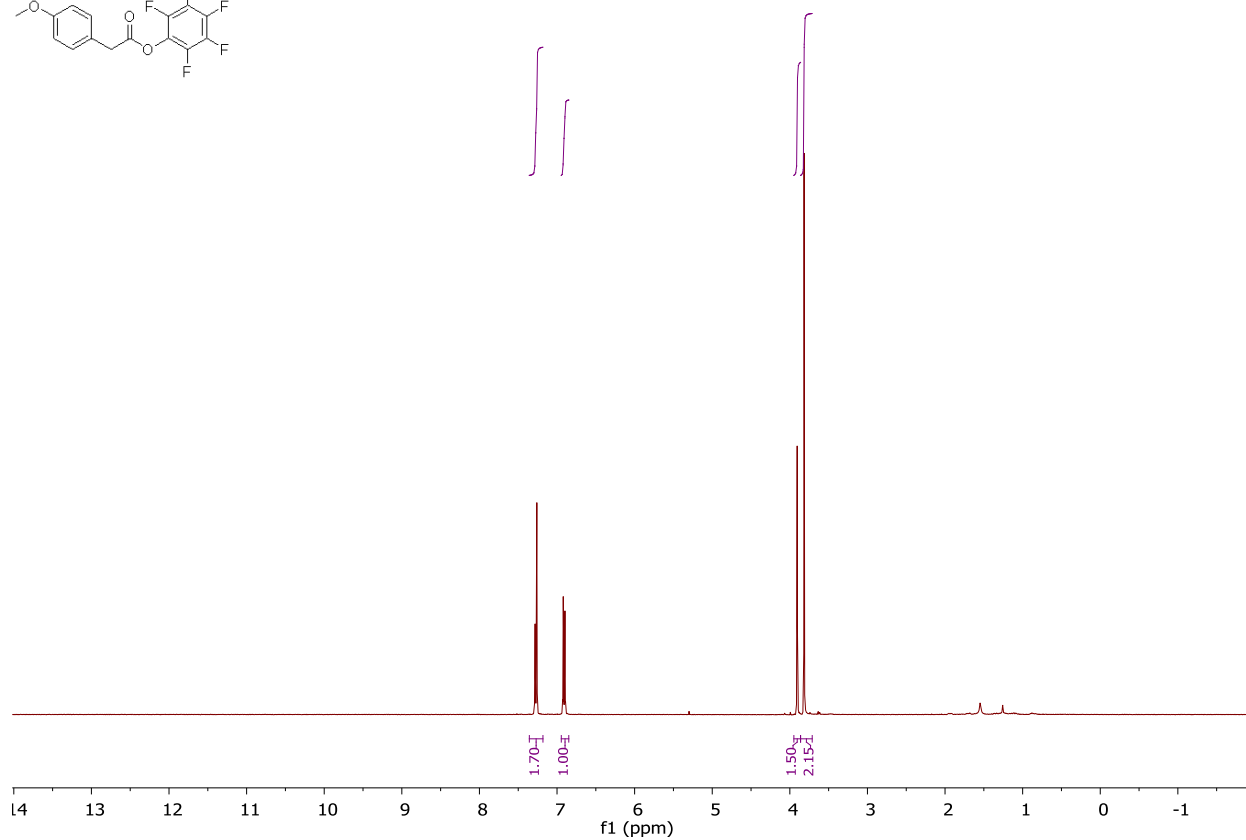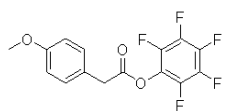

Pentafluorophenyl 2-(4-methoxyphenyl)acetate (S8)

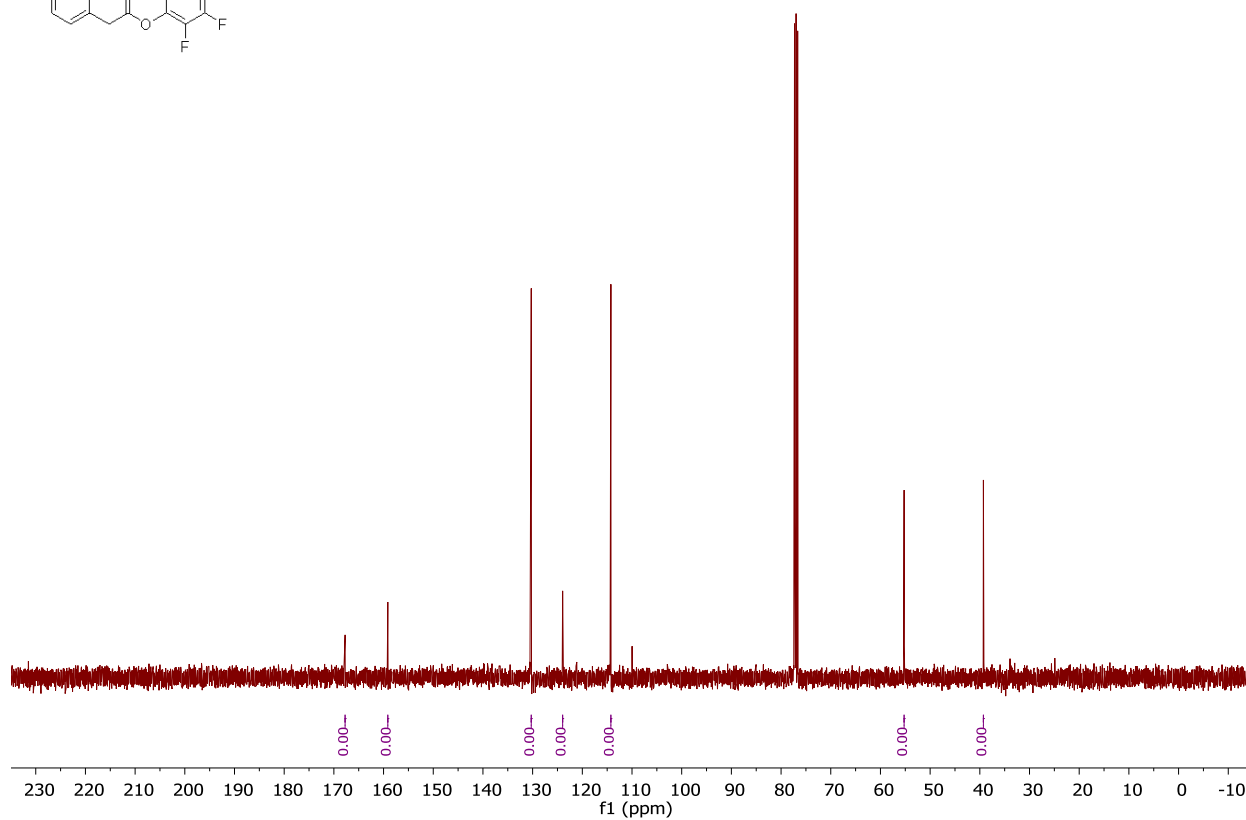

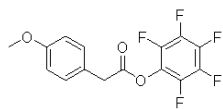

Pentafluorophenyl 2-(4-methoxyphenyl)acetate (S8)

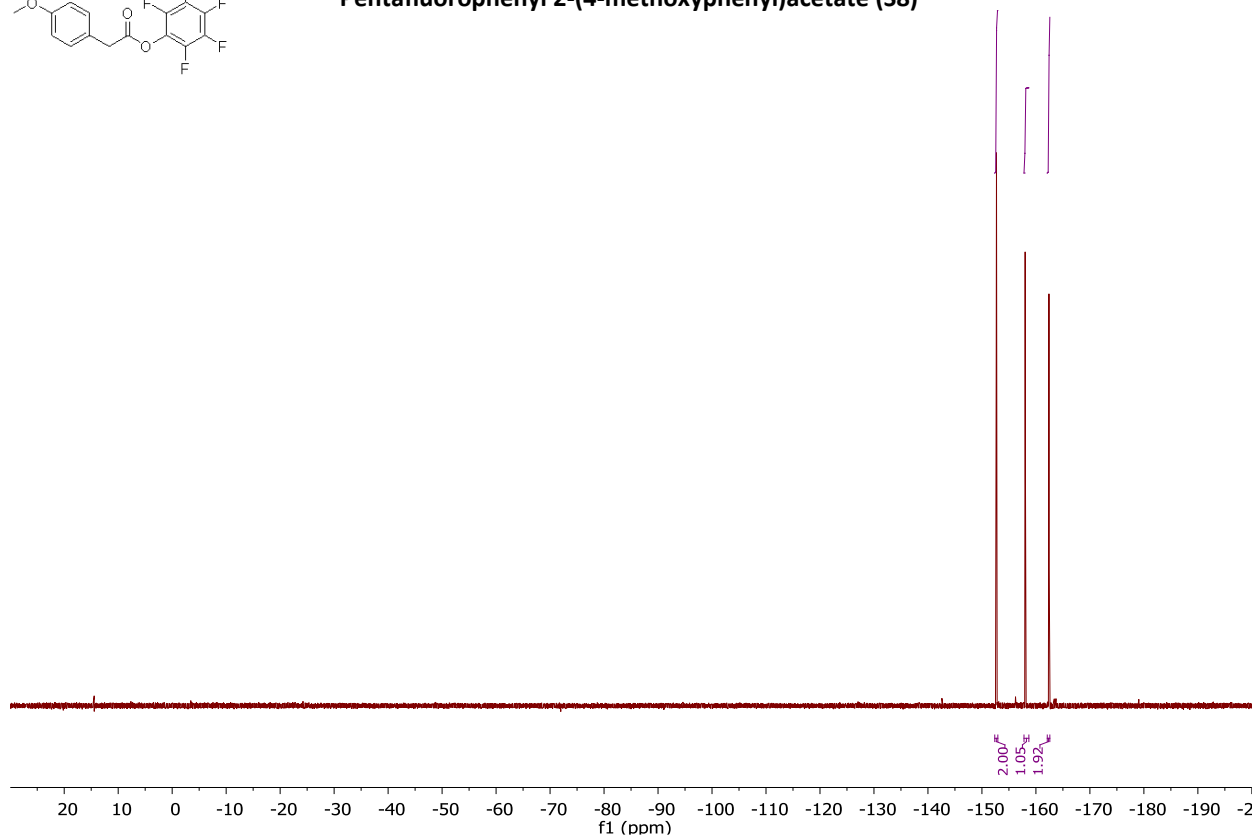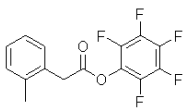

Pentafluorophenyl 2-(o-tolyl)acetate (S10)

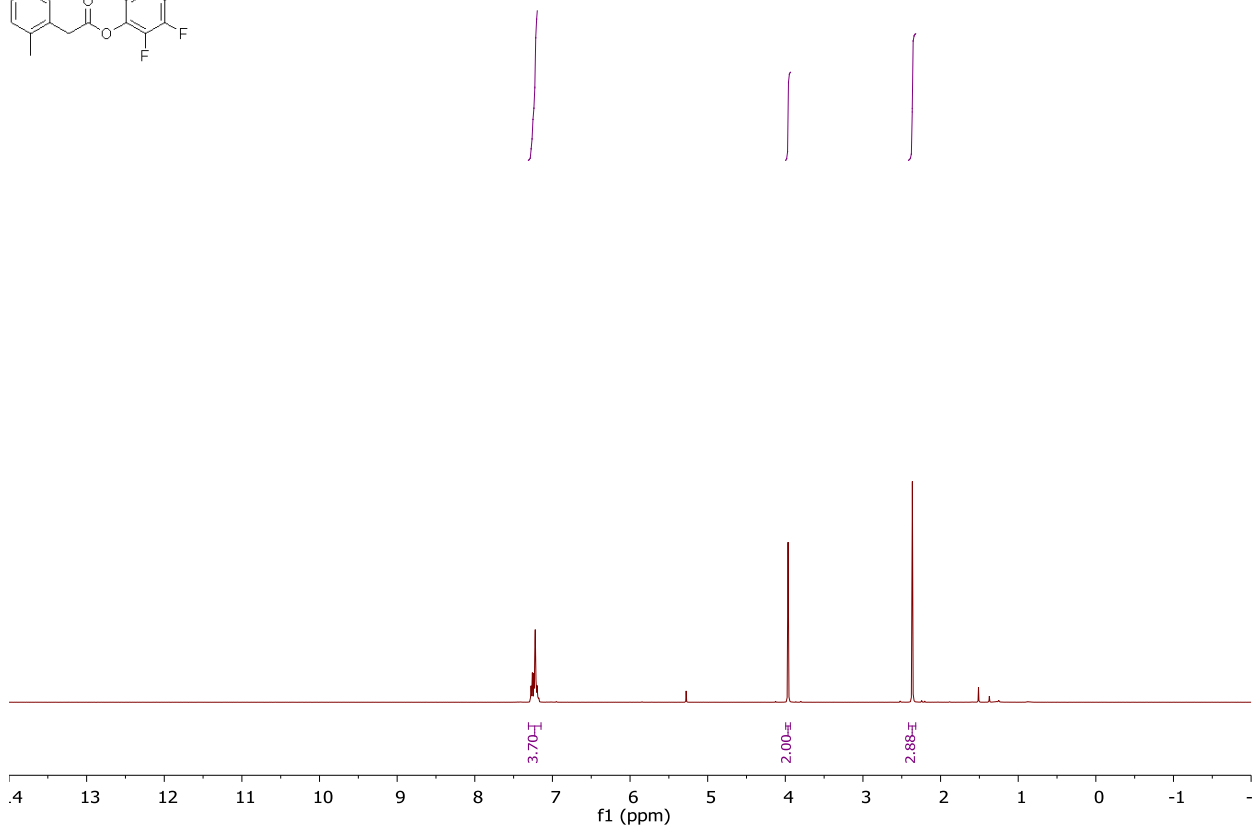

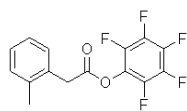

Pentafluorophenyl 2-(o-tolyl)acetate (S10)

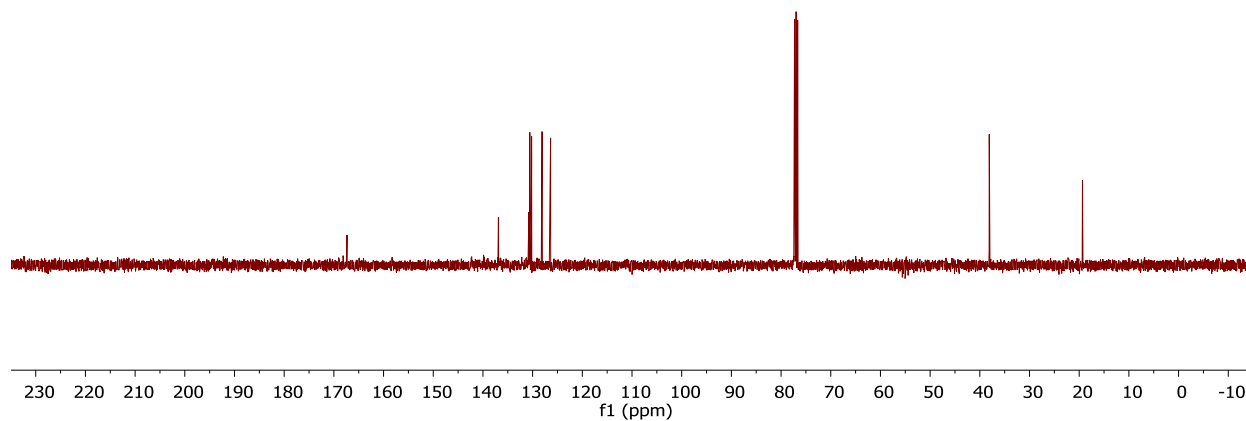

Pentafluorophenyl 2-(o-tolyl)acetate (S10)

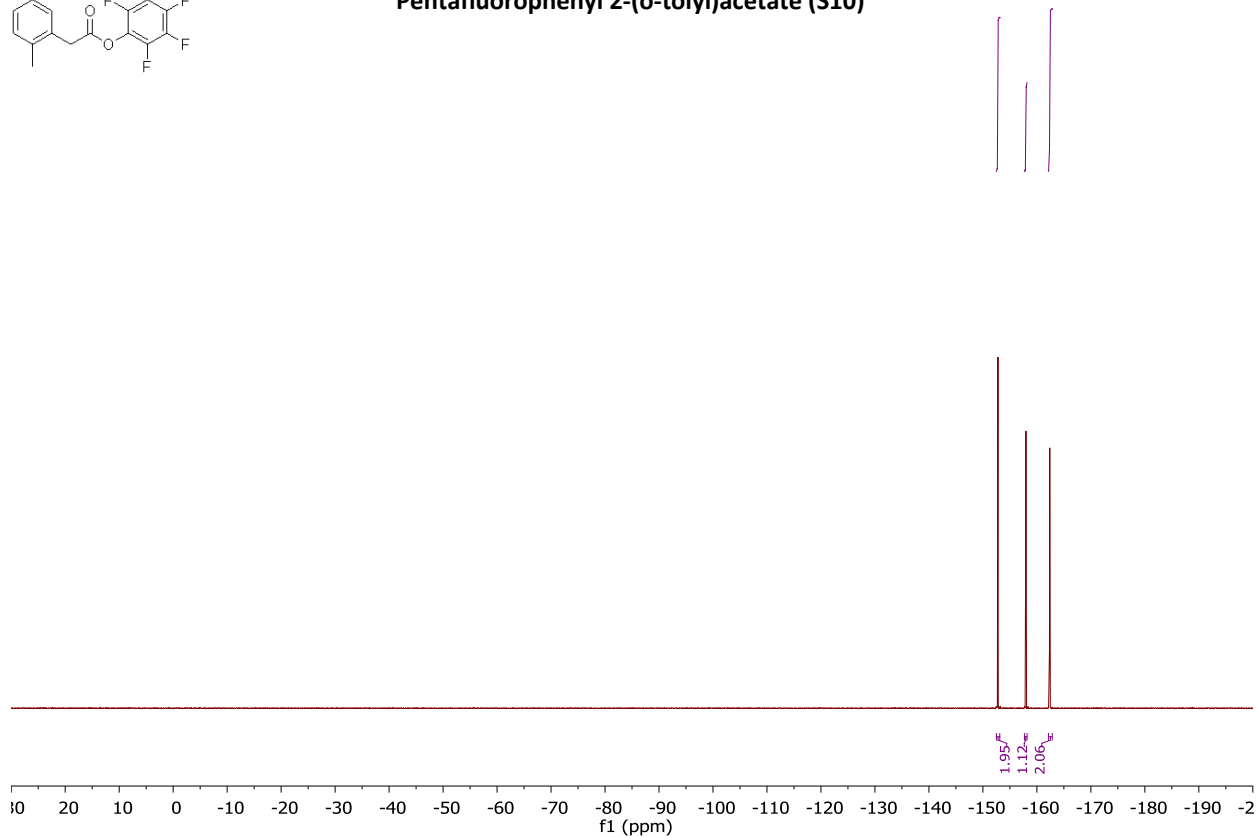



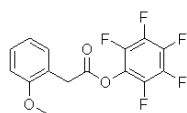

Pentafluorophenyl 2-(2-methoxyphenyl)acetate (S13)

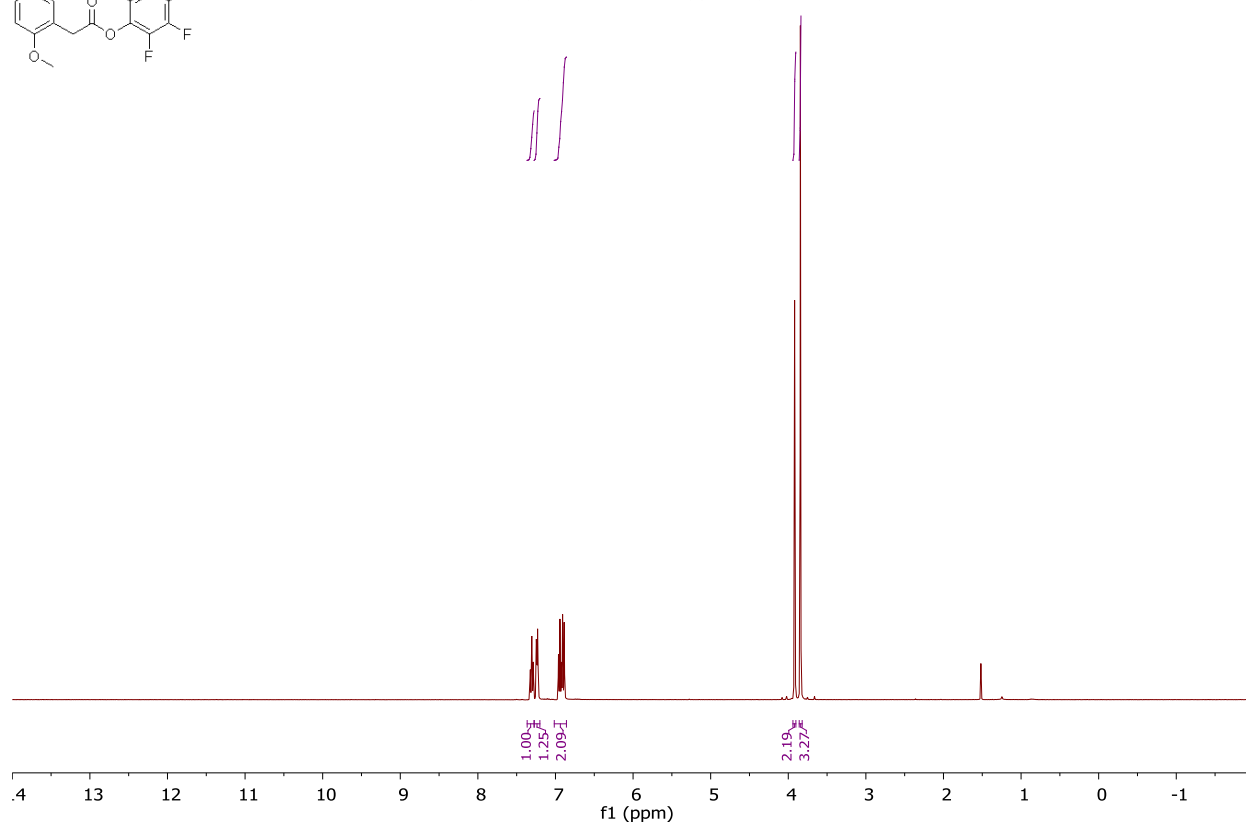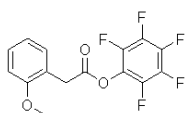

Pentafluorophenyl 2-(2-methoxyphenyl)acetate (S13)

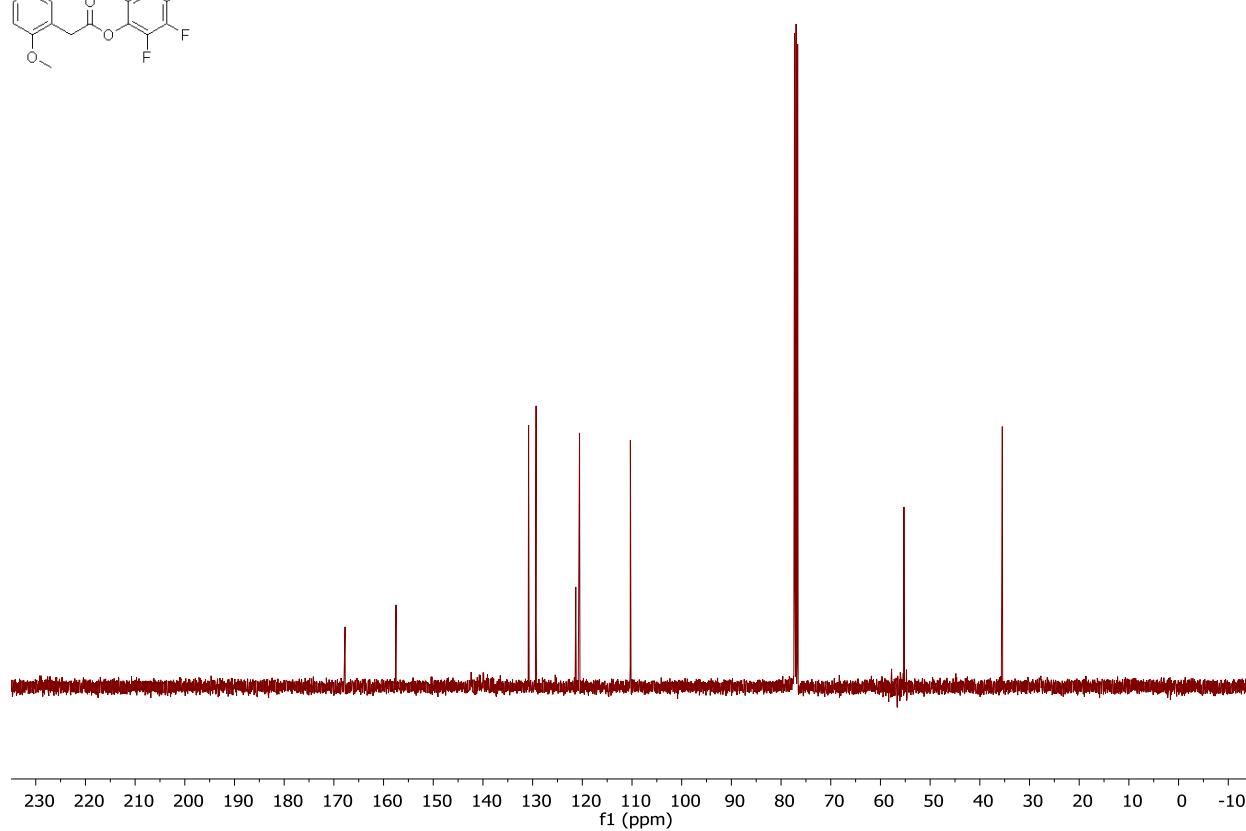



Pentafluorophenyl 2-(2-methoxyphenyl)acetate (S13)

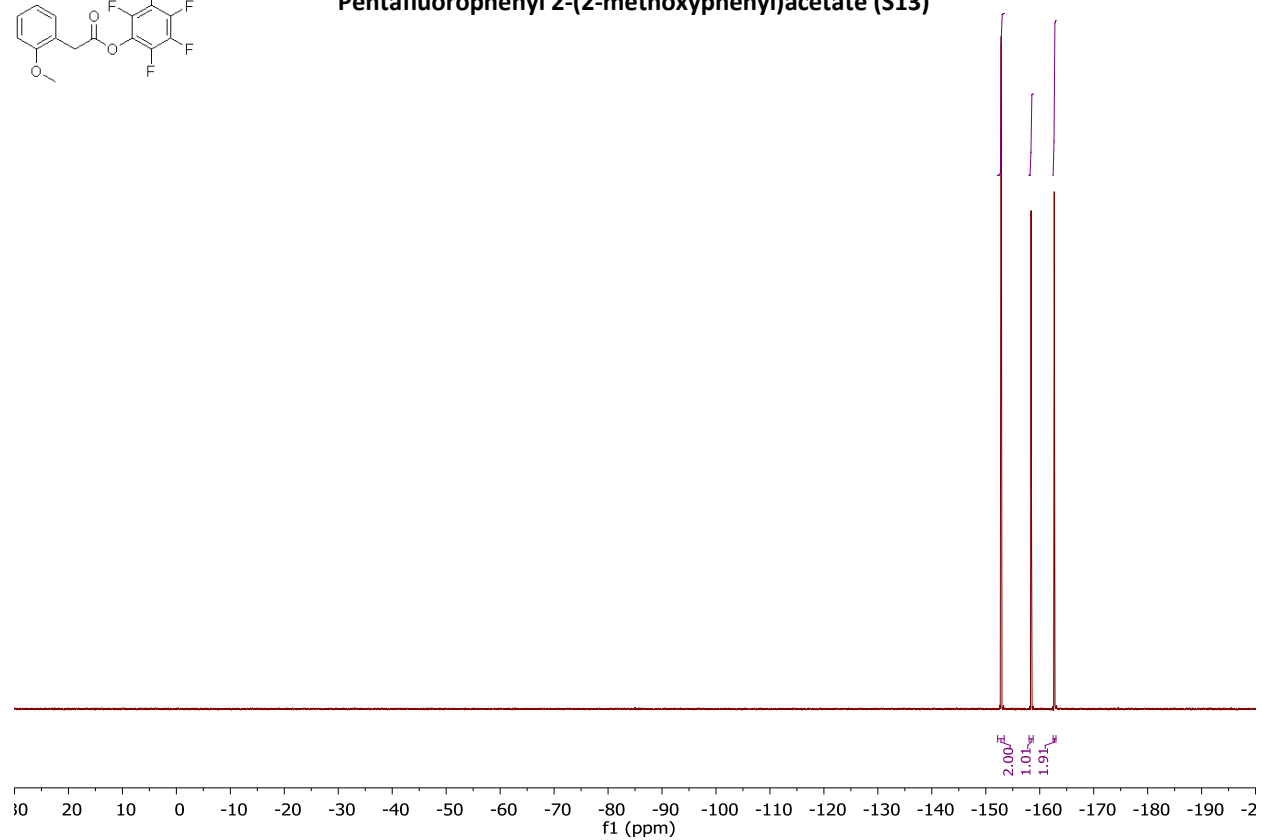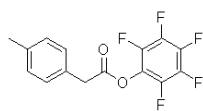

Pentafluorophenyl 2-(4-methylphenyl)acetate (S7)

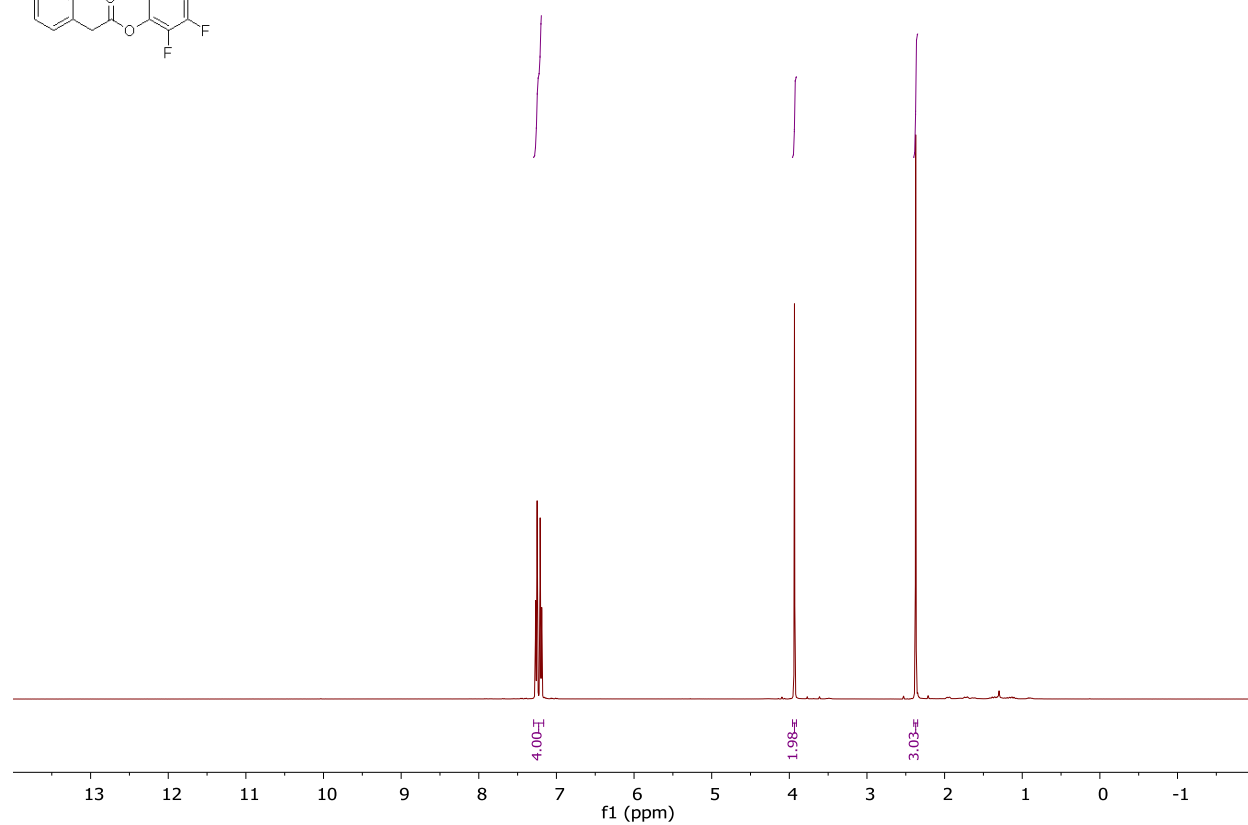

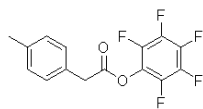

Pentafluorophenyl 2-(4-methylphenyl)acetate (S7)

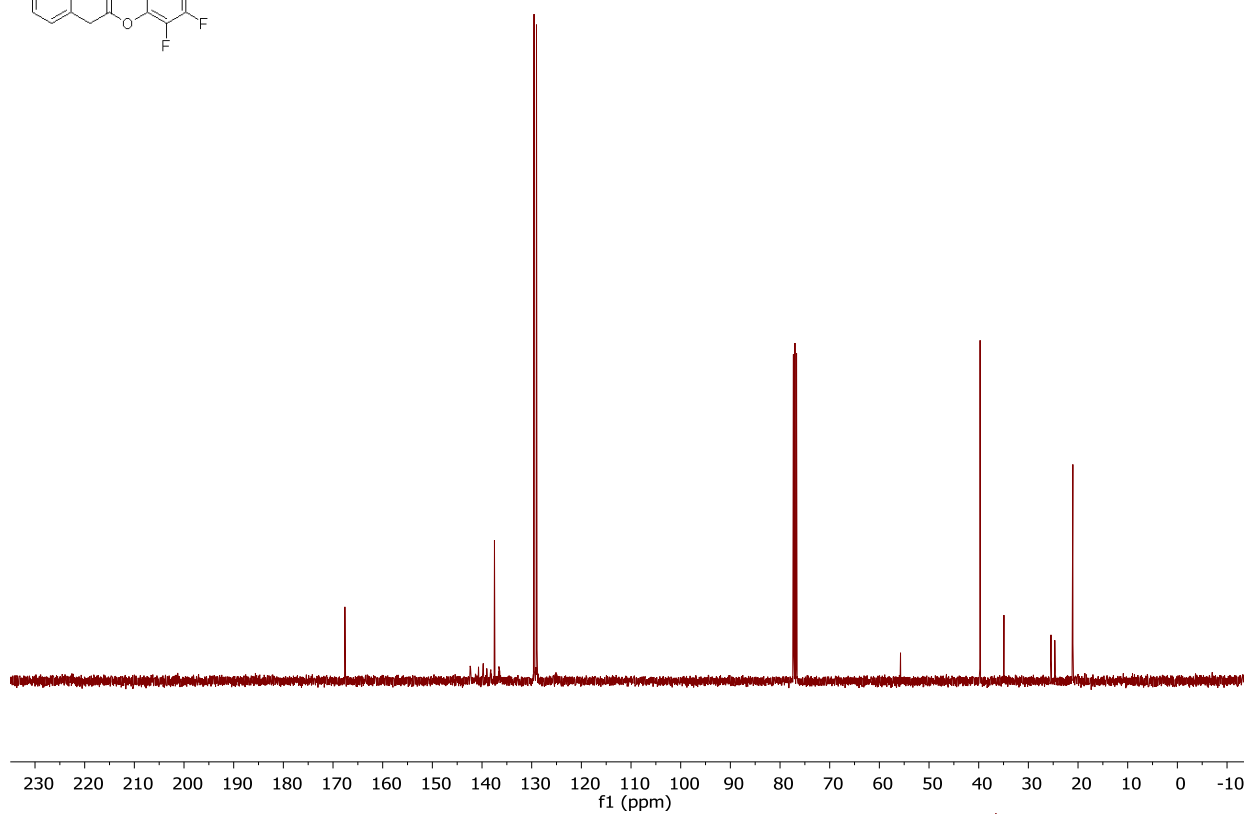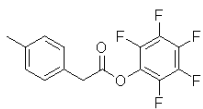

Pentafluorophenyl 2-(4-methylphenyl)acetate (S7)

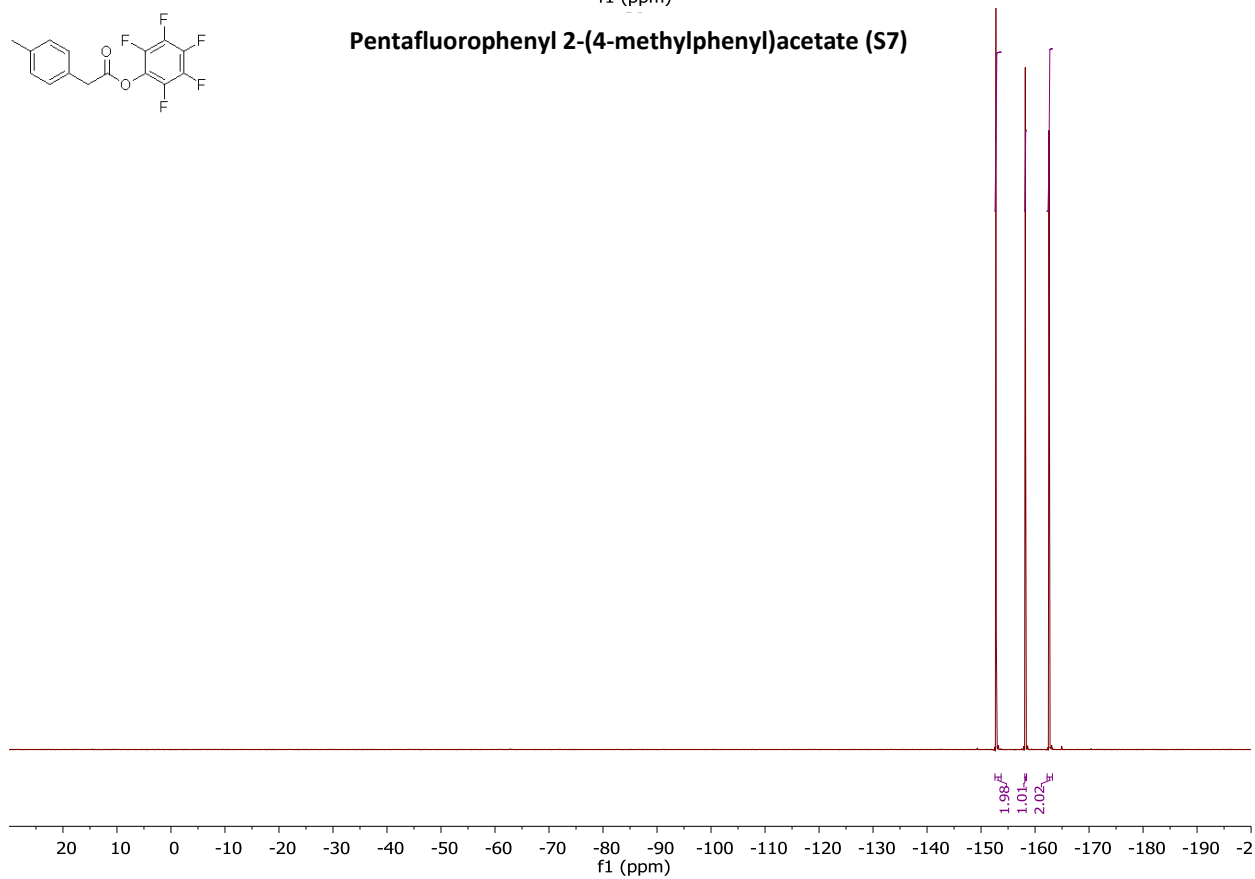

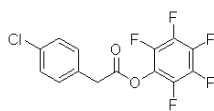

Pentafluorophenyl 2-(4-chlorophenyl)acetate (S9)

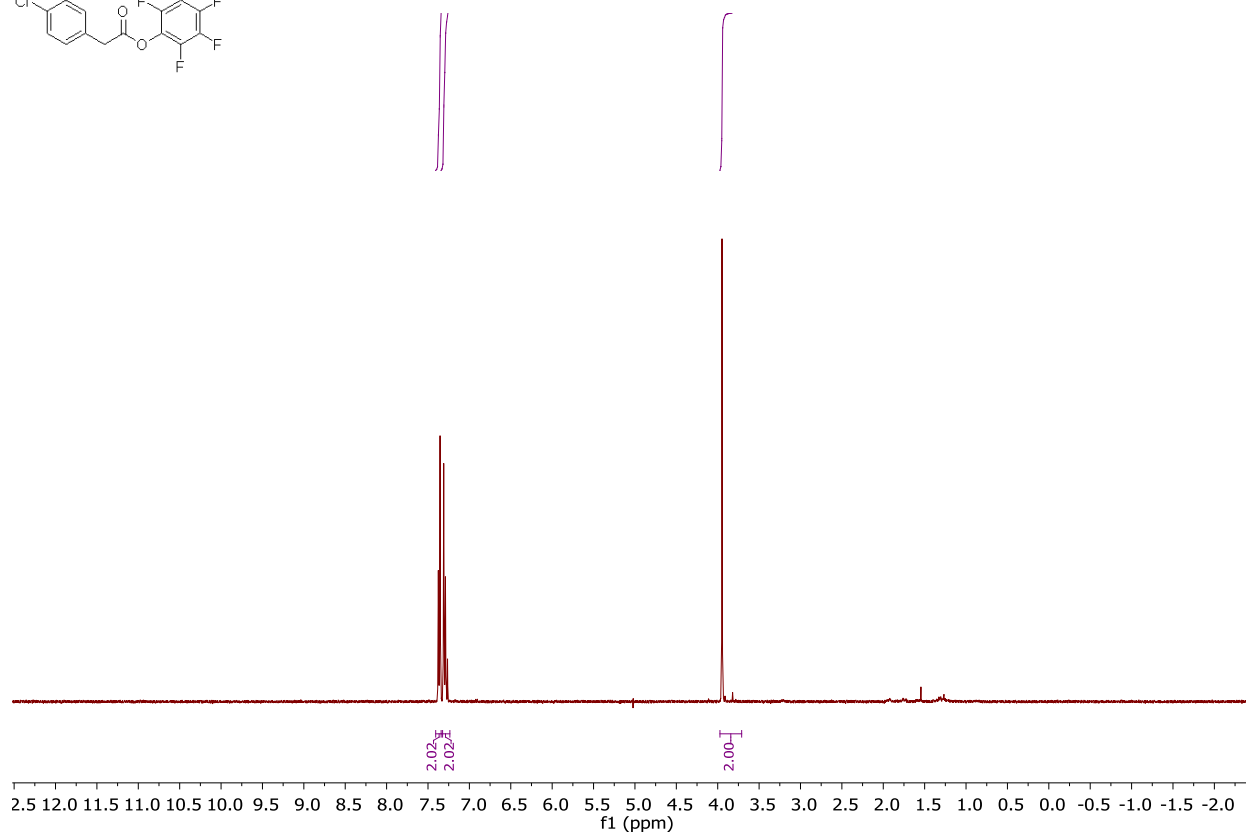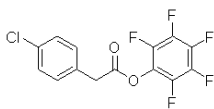

Pentafluorophenyl 2-(4-chlorophenyl)acetate (S9)

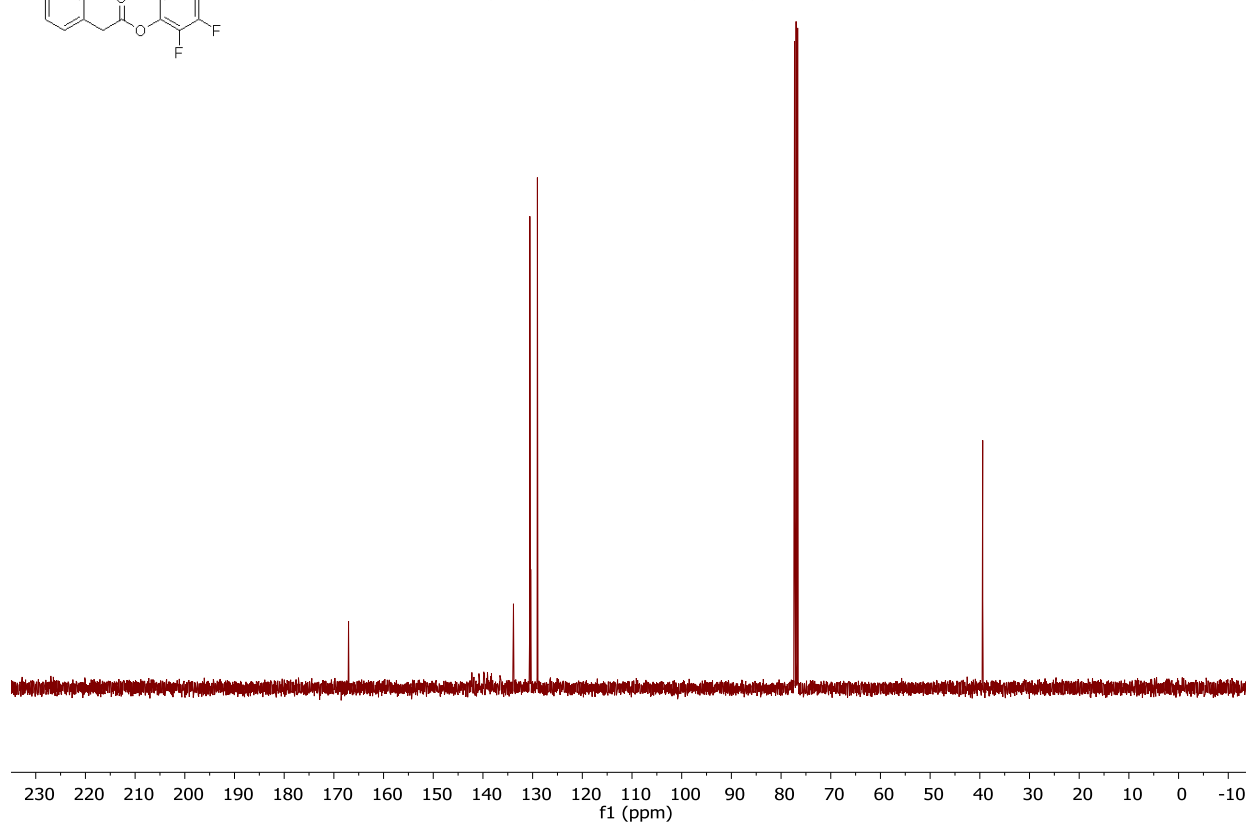

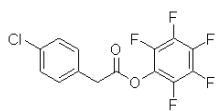

Pentafluorophenyl 2-(4-chlorophenyl)acetate (S9)

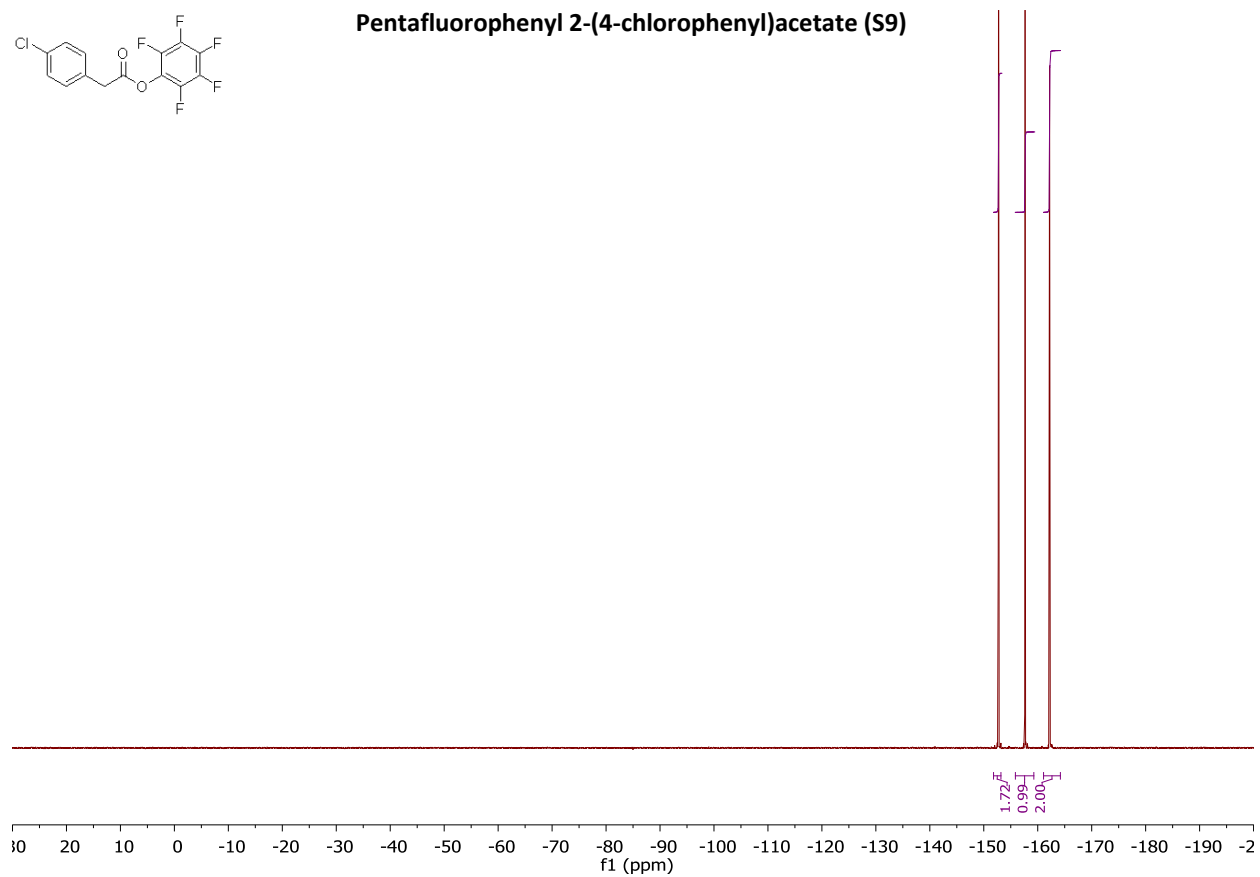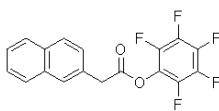

Pentafluorophenyl 2-(naphthalene-2-yl)acetate (S14)

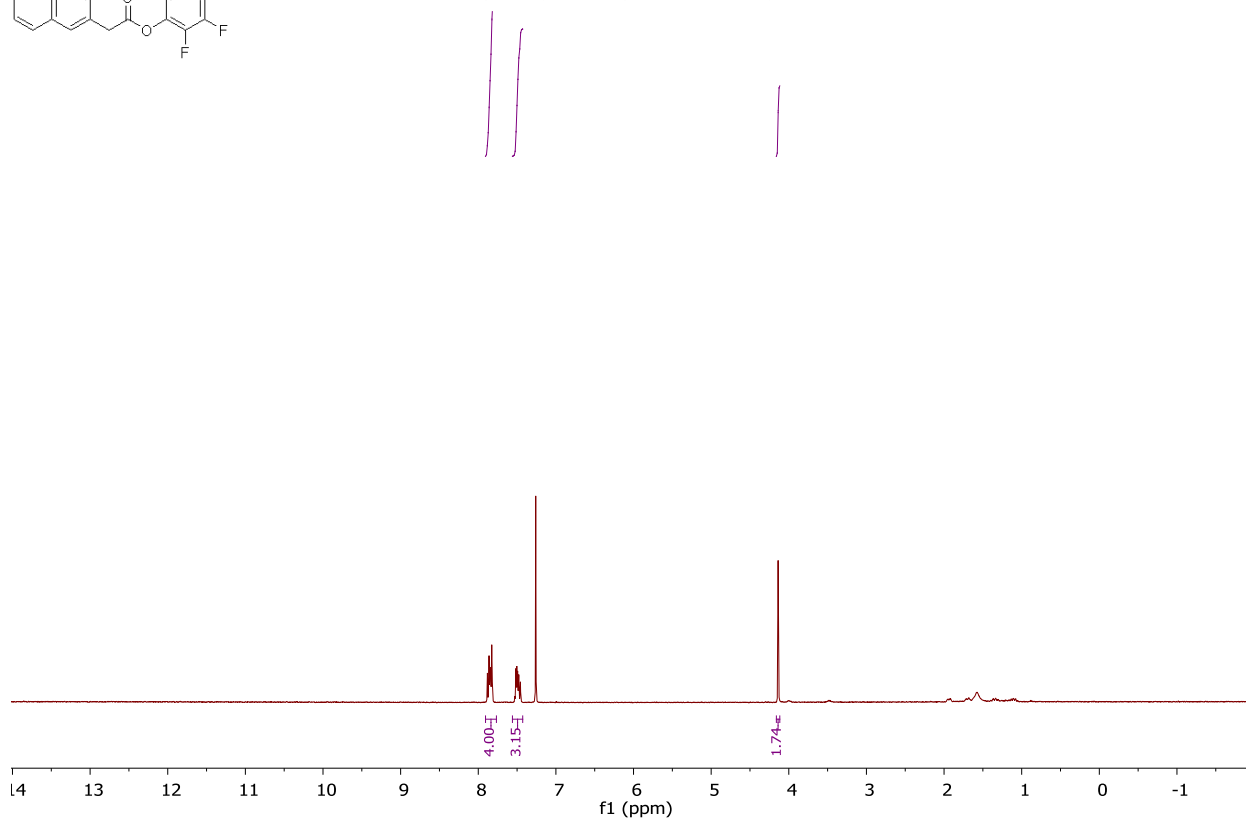

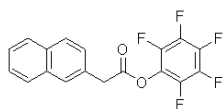

Pentafluorophenyl 2-(naphthalene-2-yl)acetate (S14)

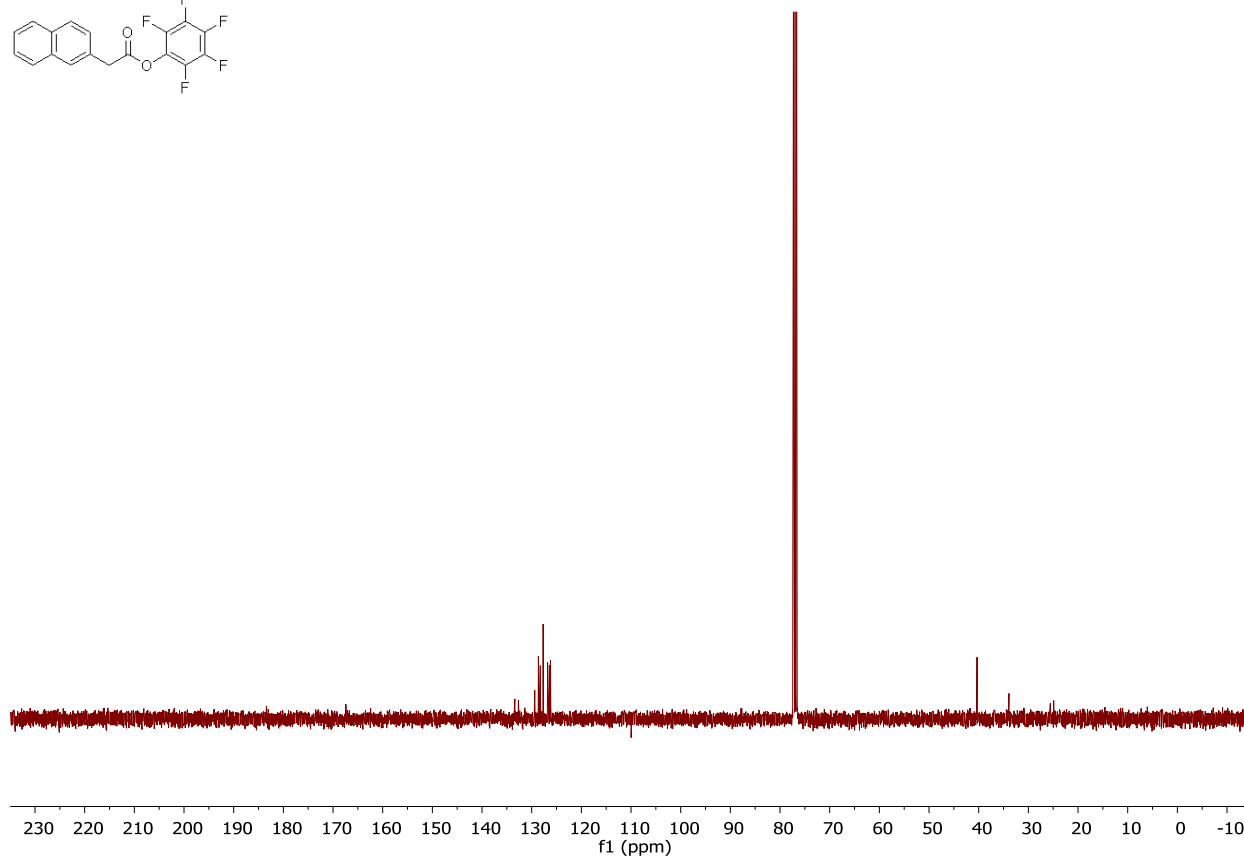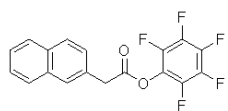

Pentafluorophenyl 2-(naphthalene-2-yl)acetate (S24)

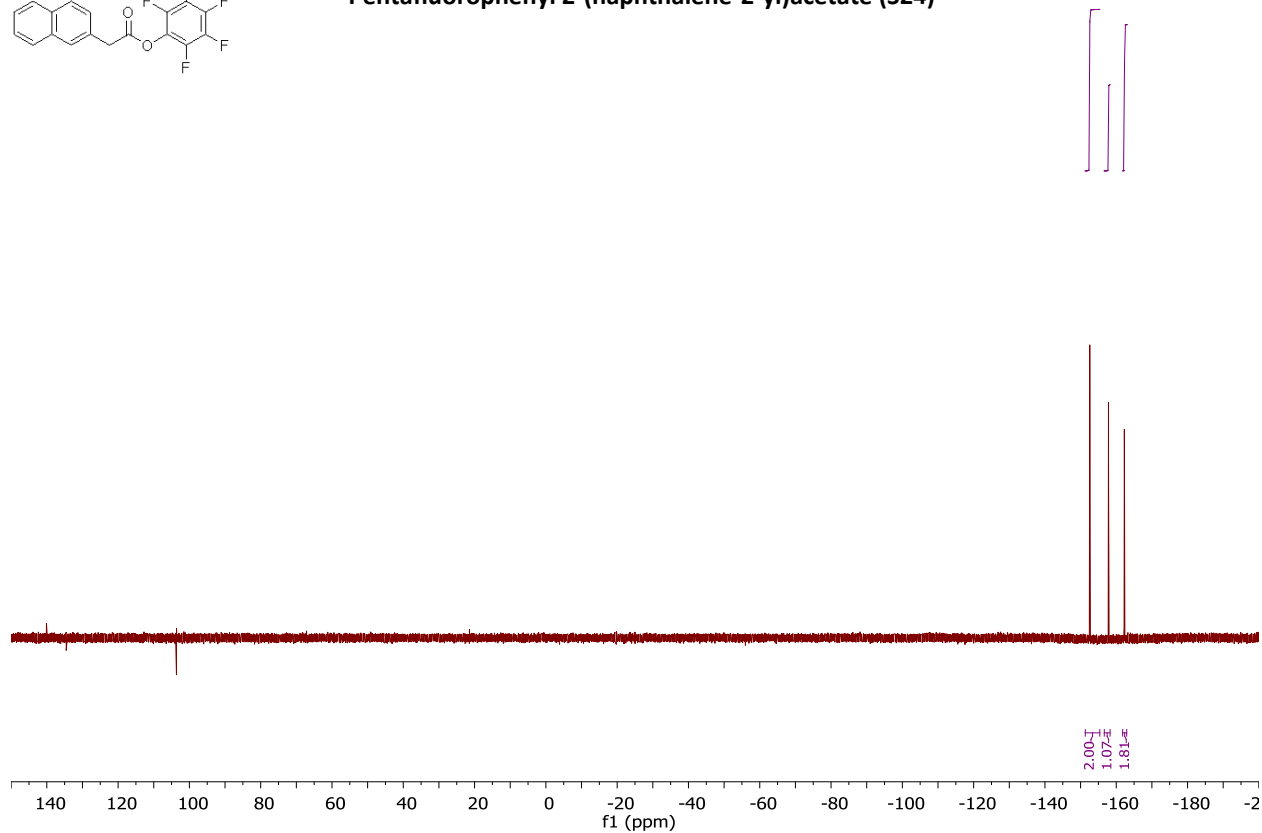

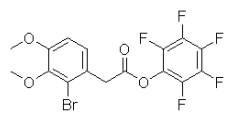

Pentafluorophenyl 2-(2-bromo-3,4-dimethoxyphenyl)acetate (S11)

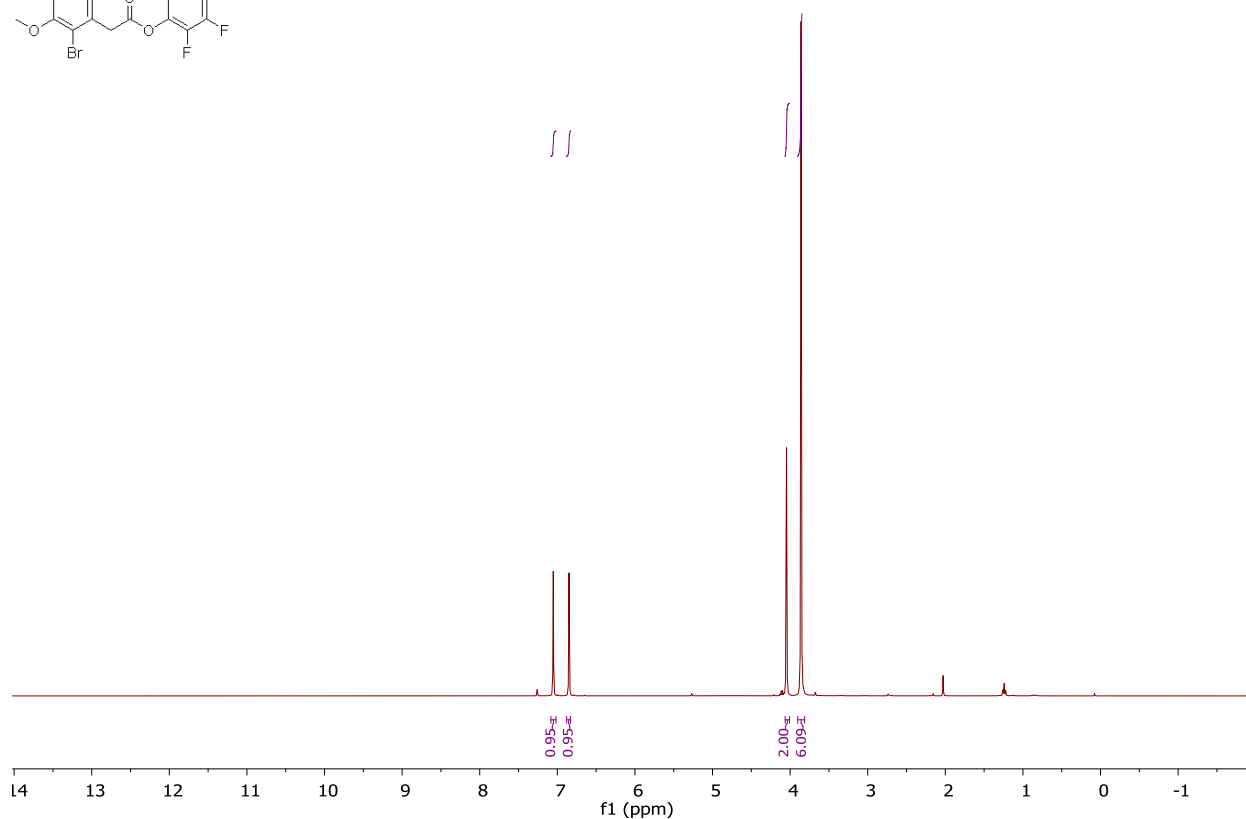

Pentafluorophenyl 2-(2-bromo-3,4-dimethoxyphenyl)acetate (S11)

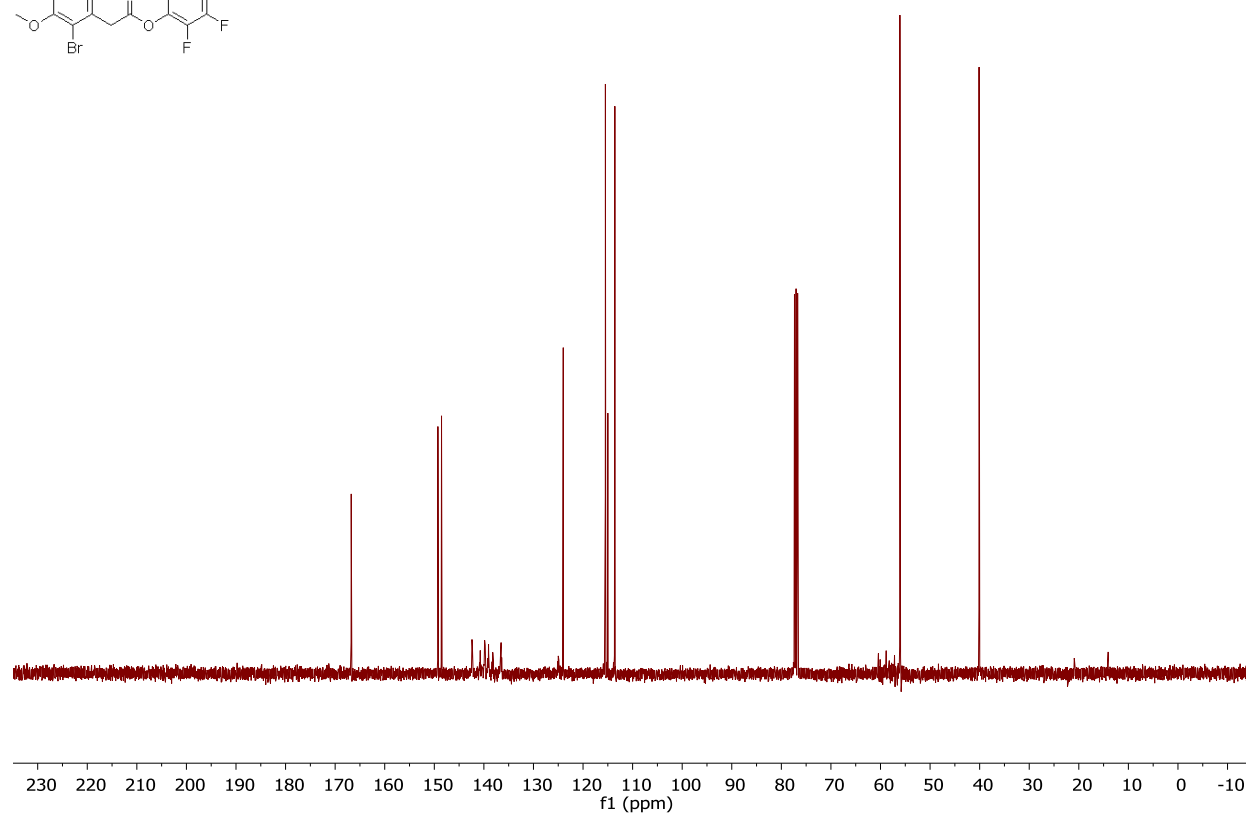

Pentafluorophenyl 2-(2-bromo-3,4-dimethoxyphenyl)acetate (S11)

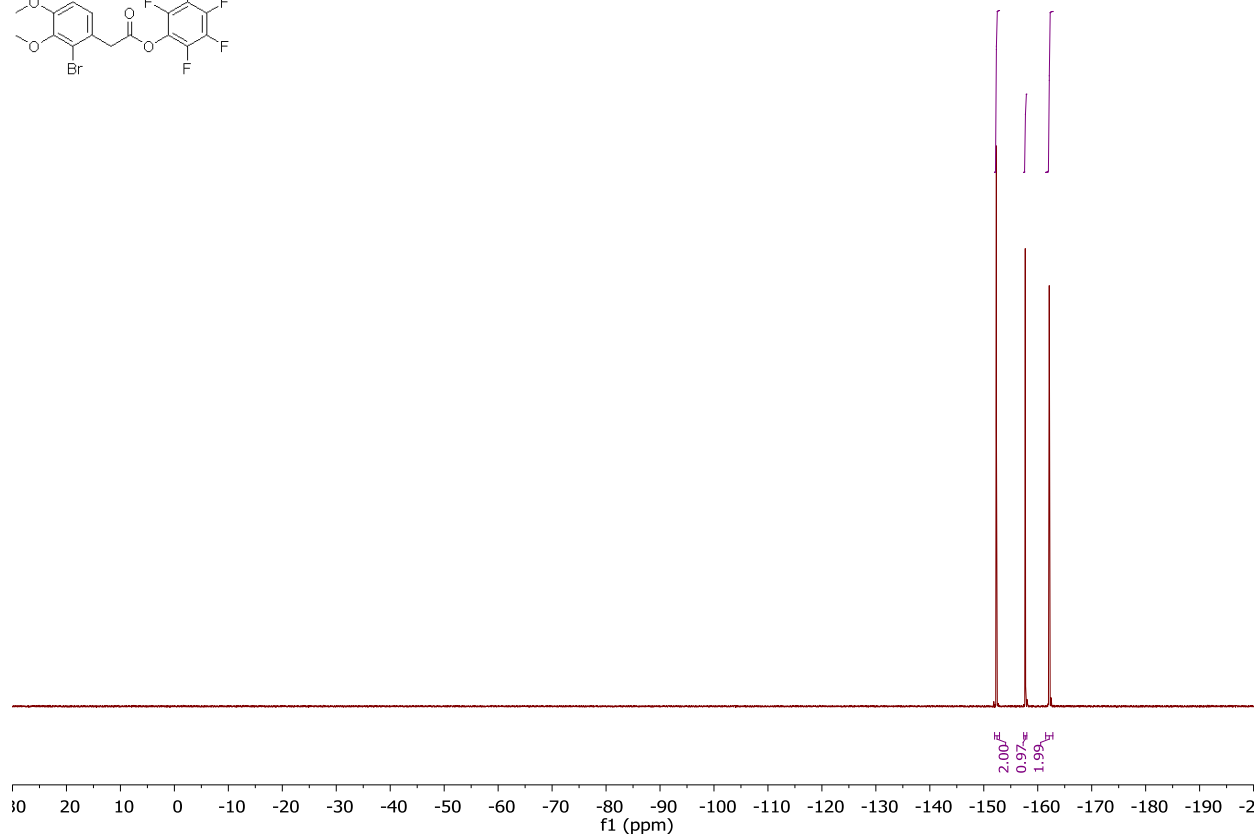

Pentafluorophenyl 2-(2,3,4-trifluorophenyl)acetate (S15)

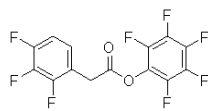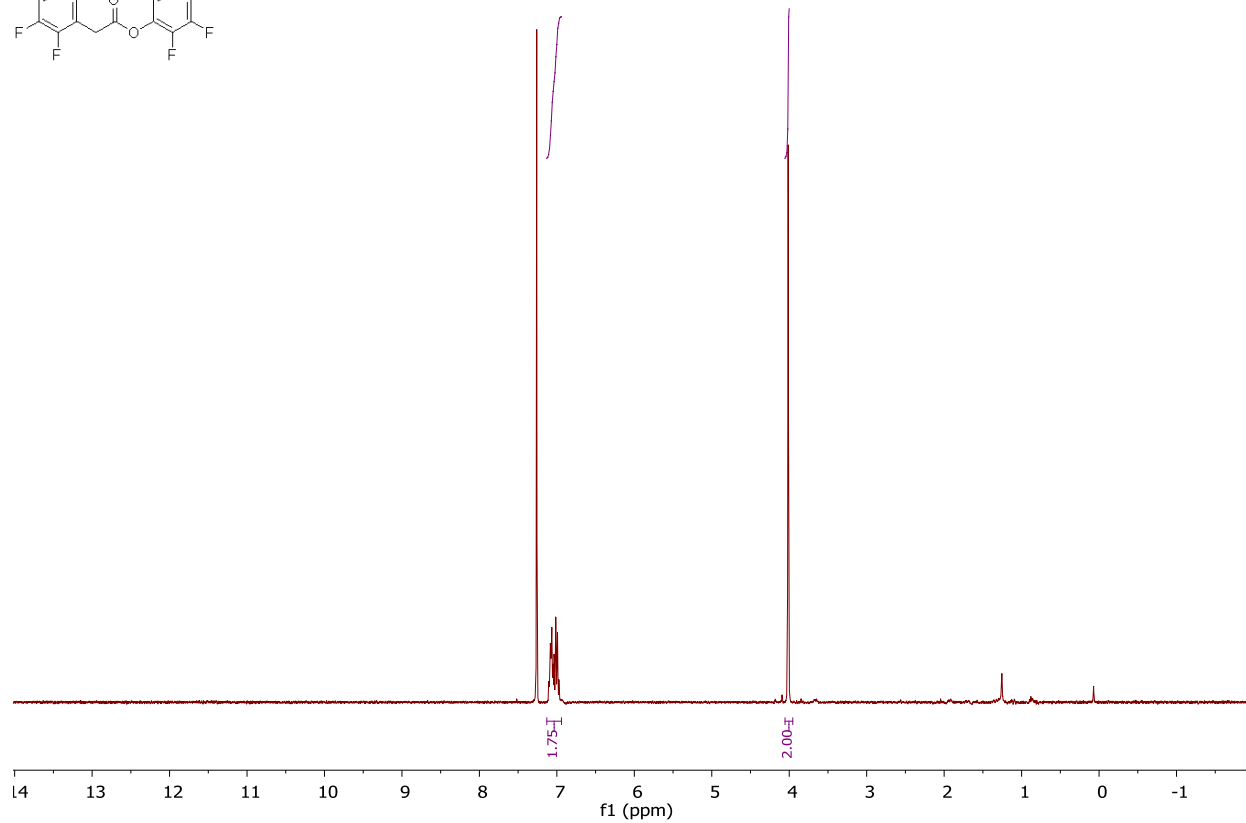



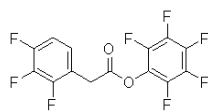

Pentafluorophenyl 2-(2,3,4-trifluorophenyl)acetate (S15)

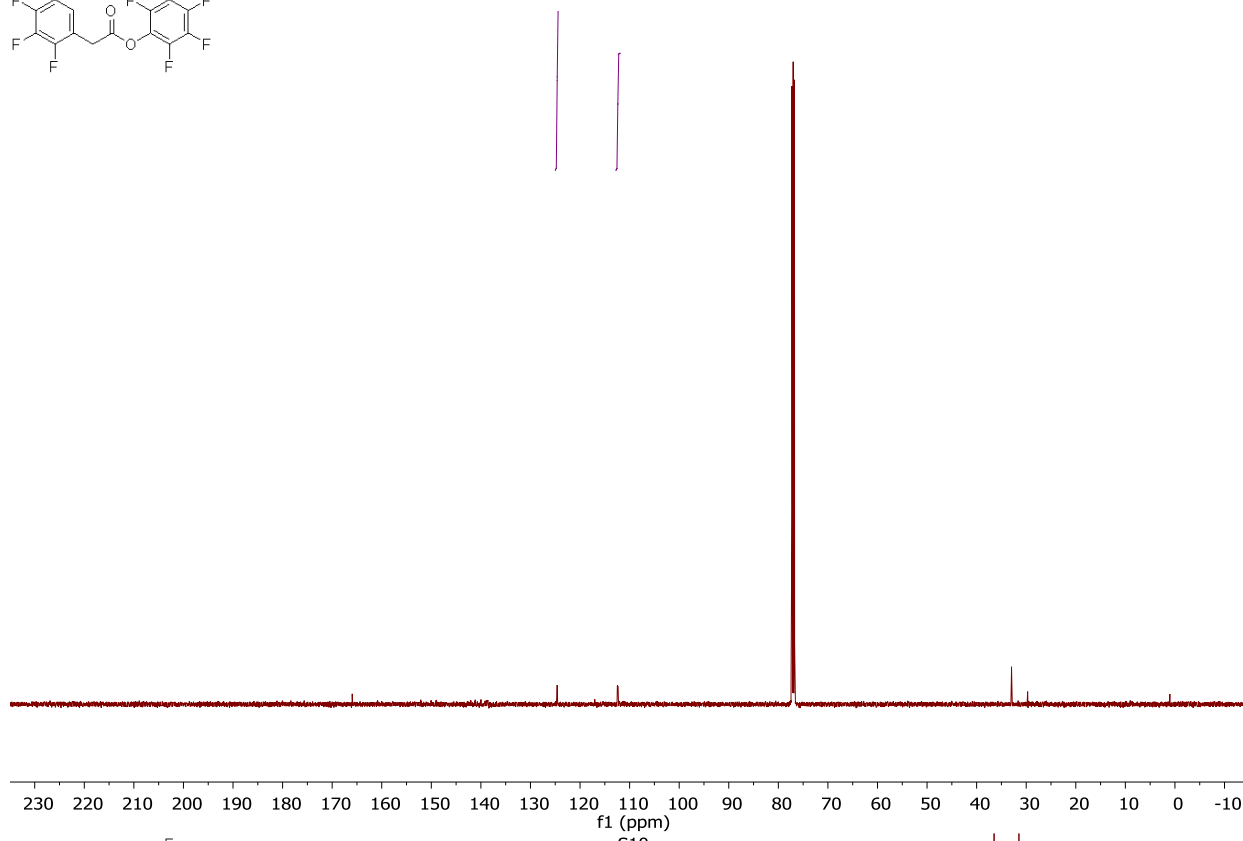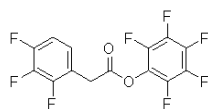

Pentafluorophenyl 2-(2,3,4-trifluorophenyl)acetate (S15)

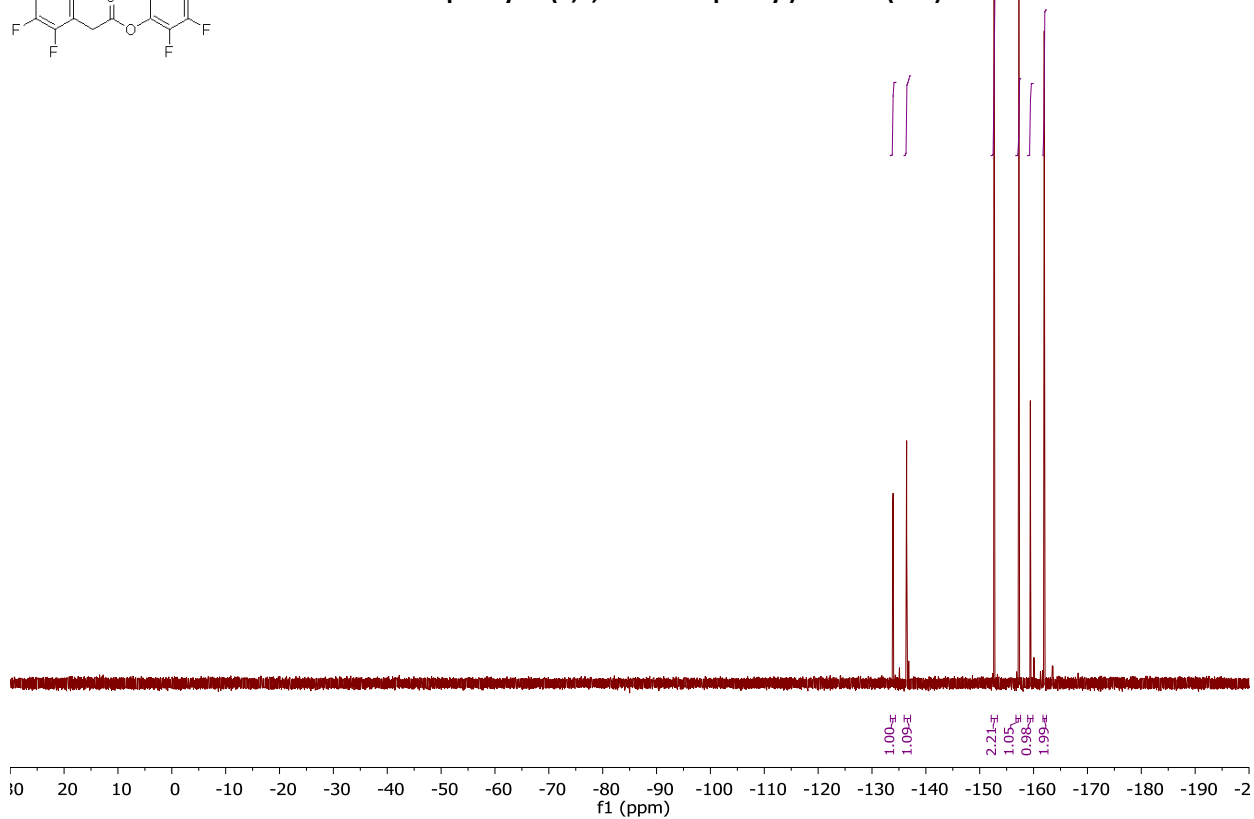

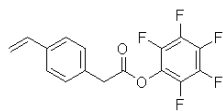

Pentafluorophenyl 2-(4-vinylphenyl)acetate (S12)

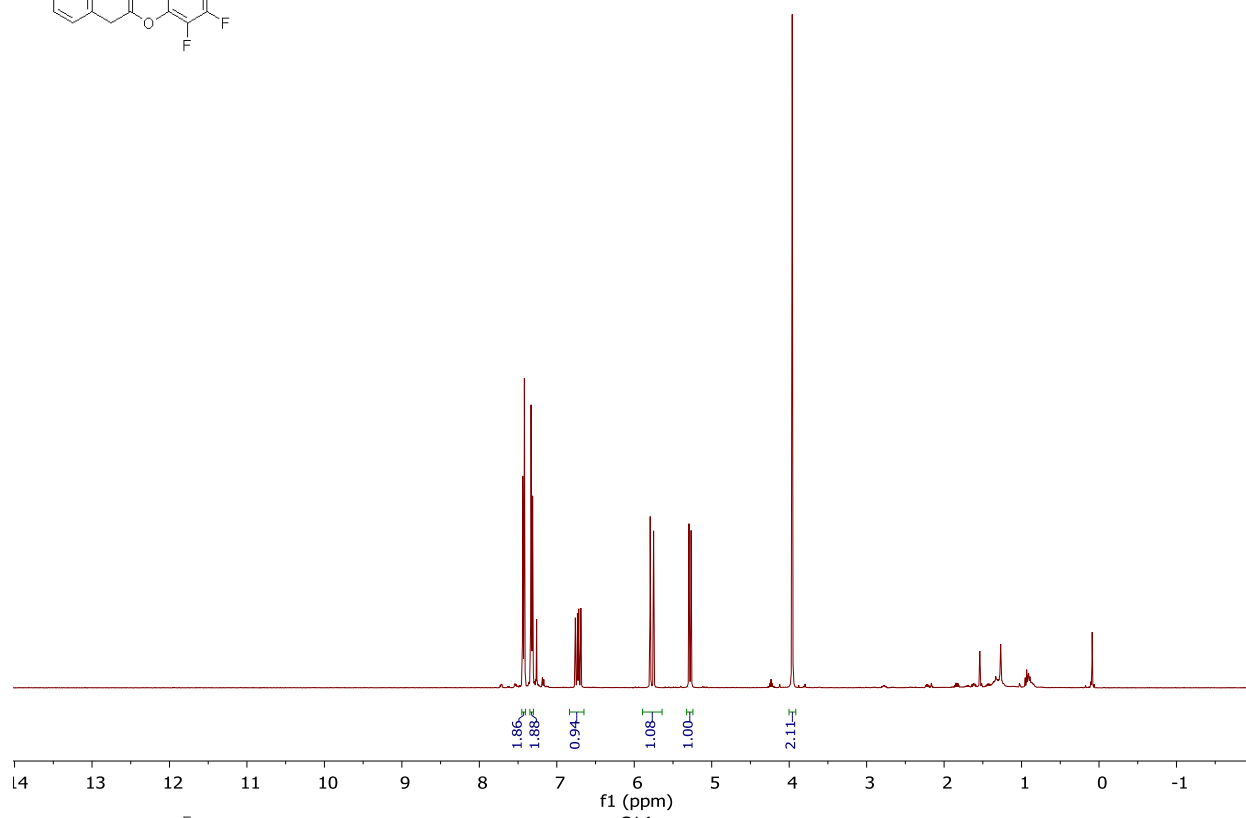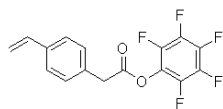

Pentafluorophenyl 2-(4-vinylphenyl)acetate (S12)

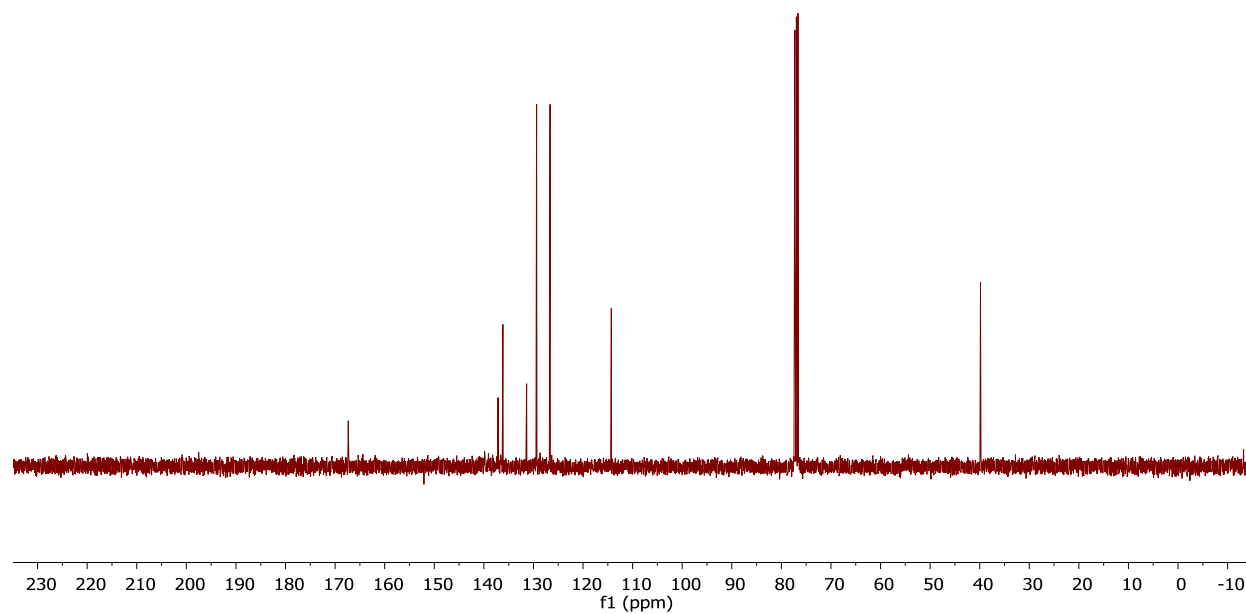



Pentafluorophenyl 2-(4-vinylphenyl)acetate (S12)

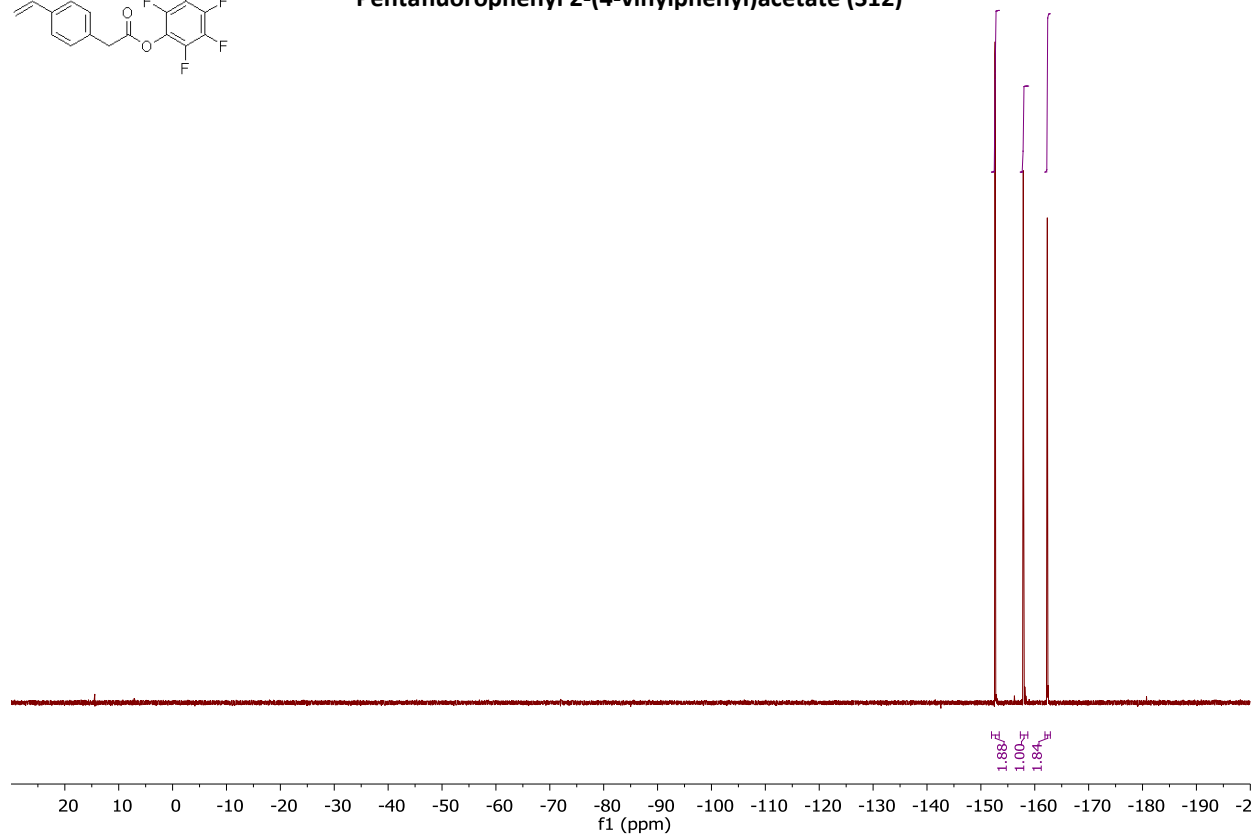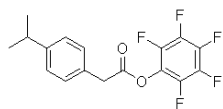

Pentafluorophenyl 2-(4-isopropylphenyl)acetate (S16)

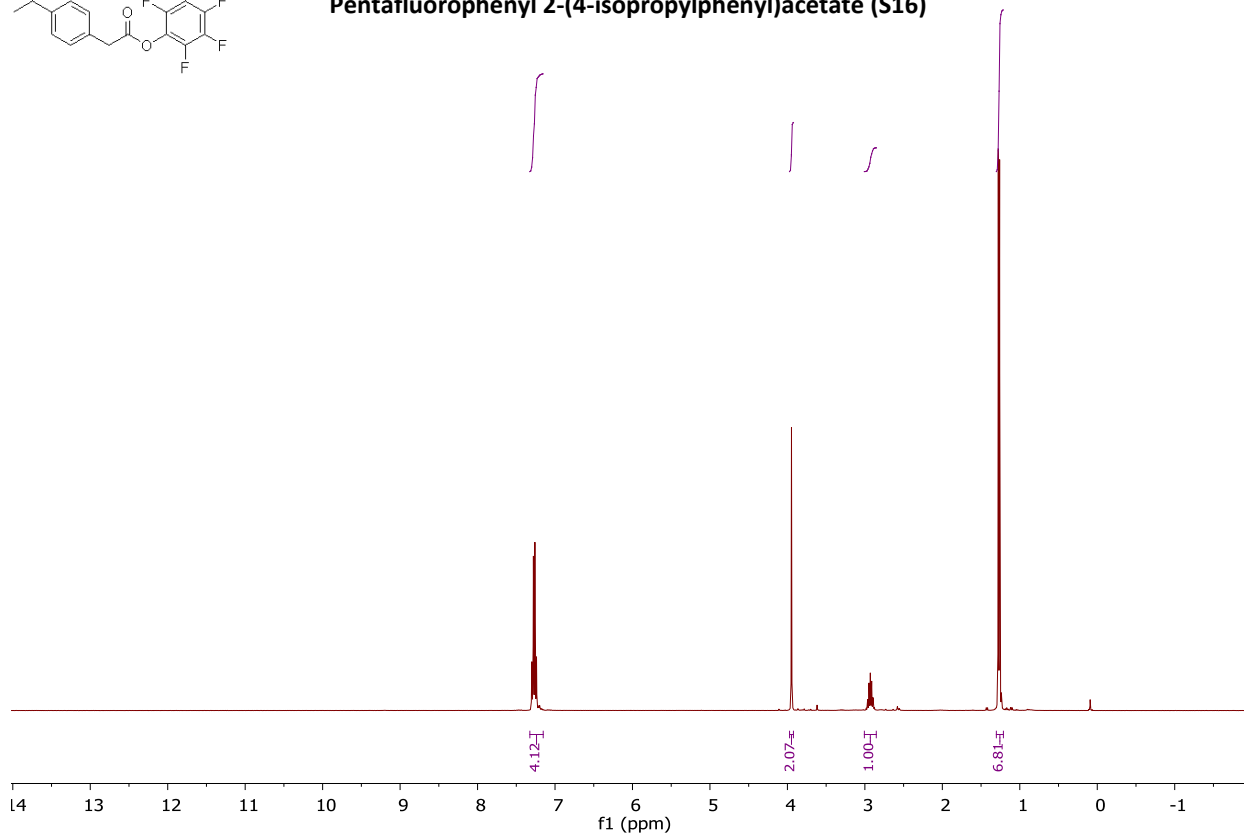

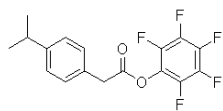

Pentafluorophenyl 2-(4-isopropylphenyl)acetate (S16)

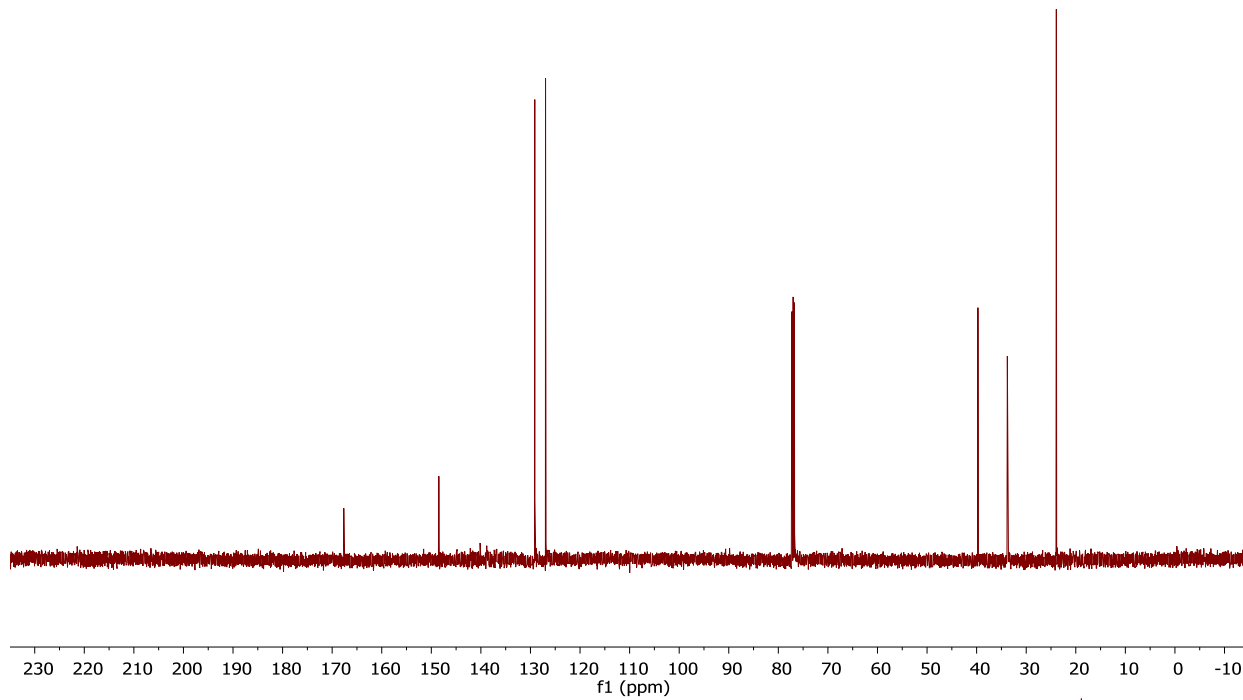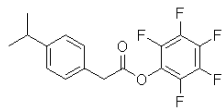

Pentafluorophenyl 2-(4-isopropylphenyl)acetate (S16)

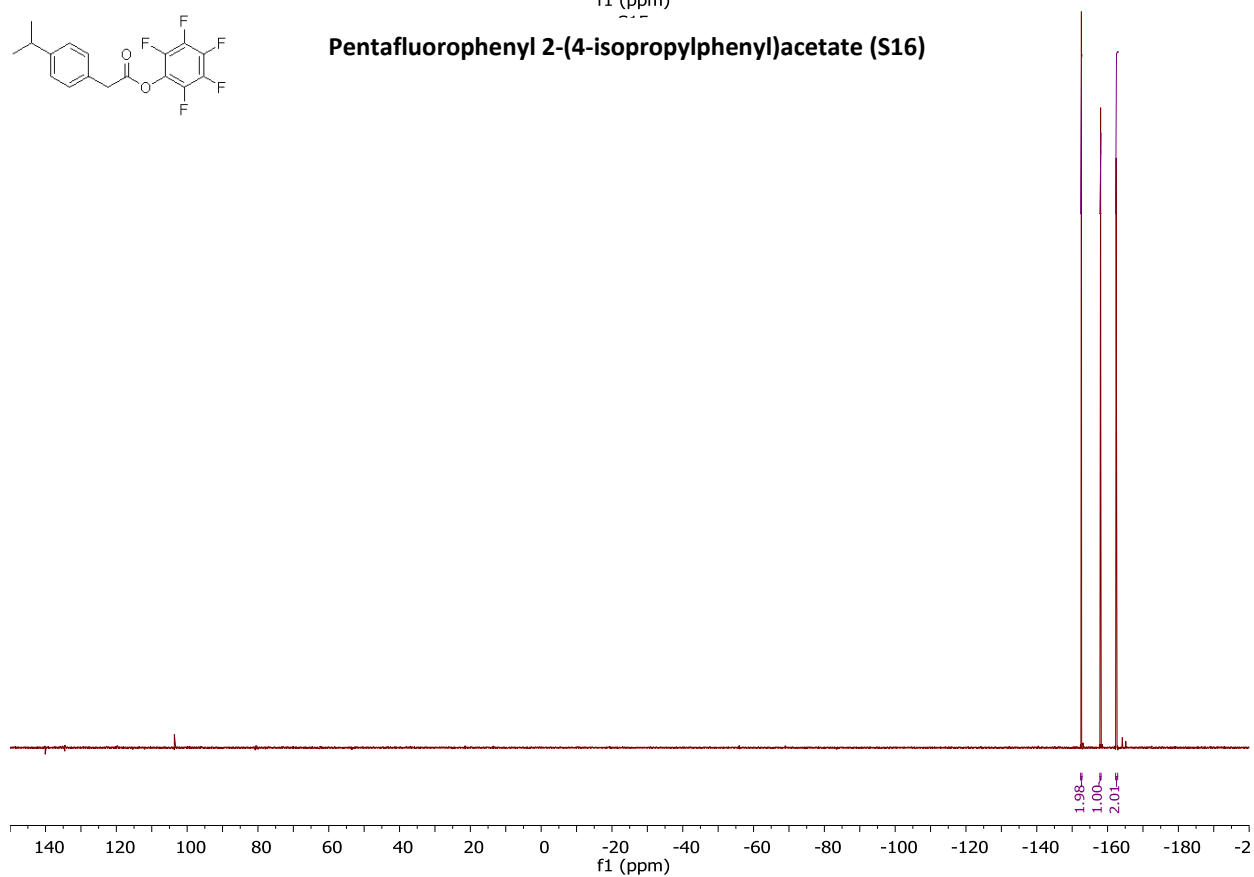

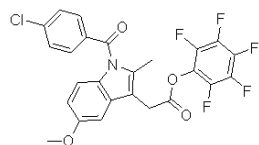

Indomethacin-pentafluorophenyl ester (S17)

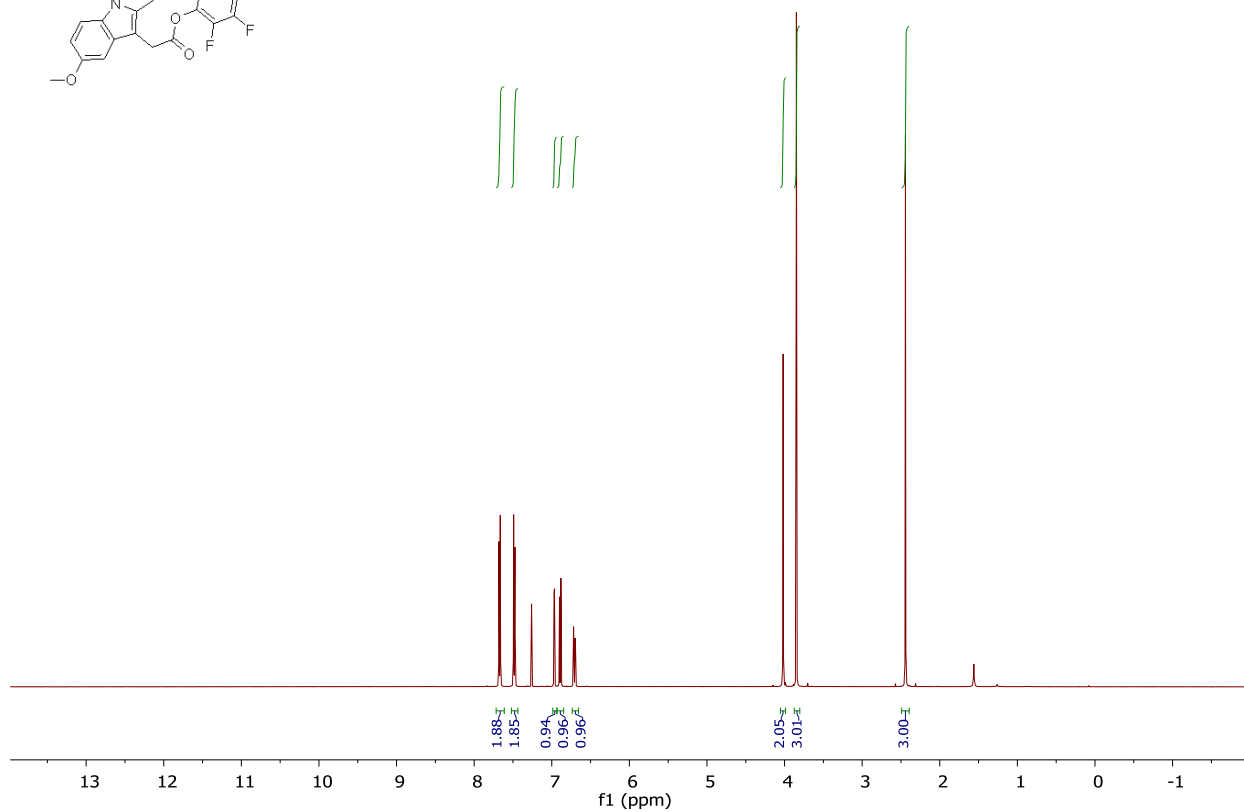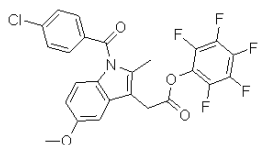

Indomethacin-pentafluorophenyl ester (S17)

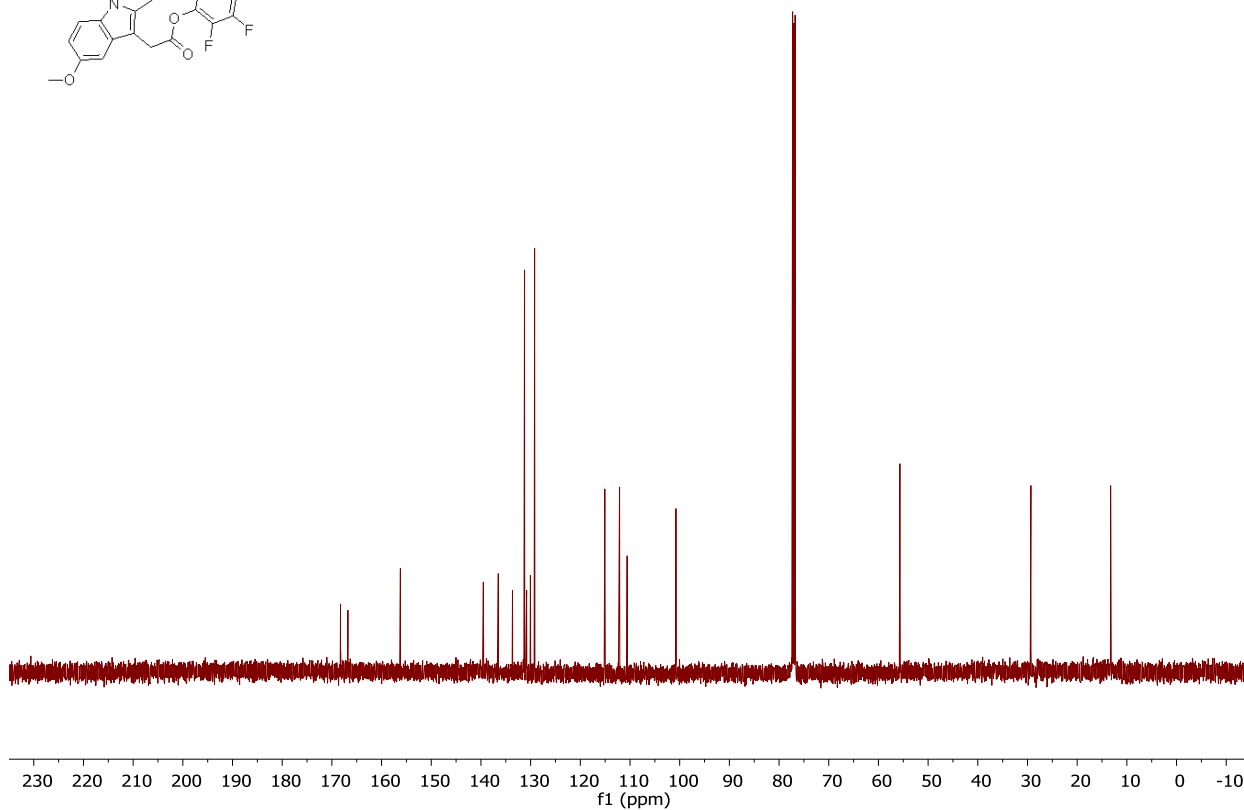

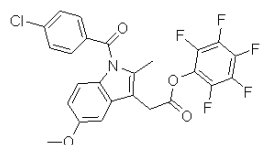

Indomethacin-pentafluorophenyl ester (S17)

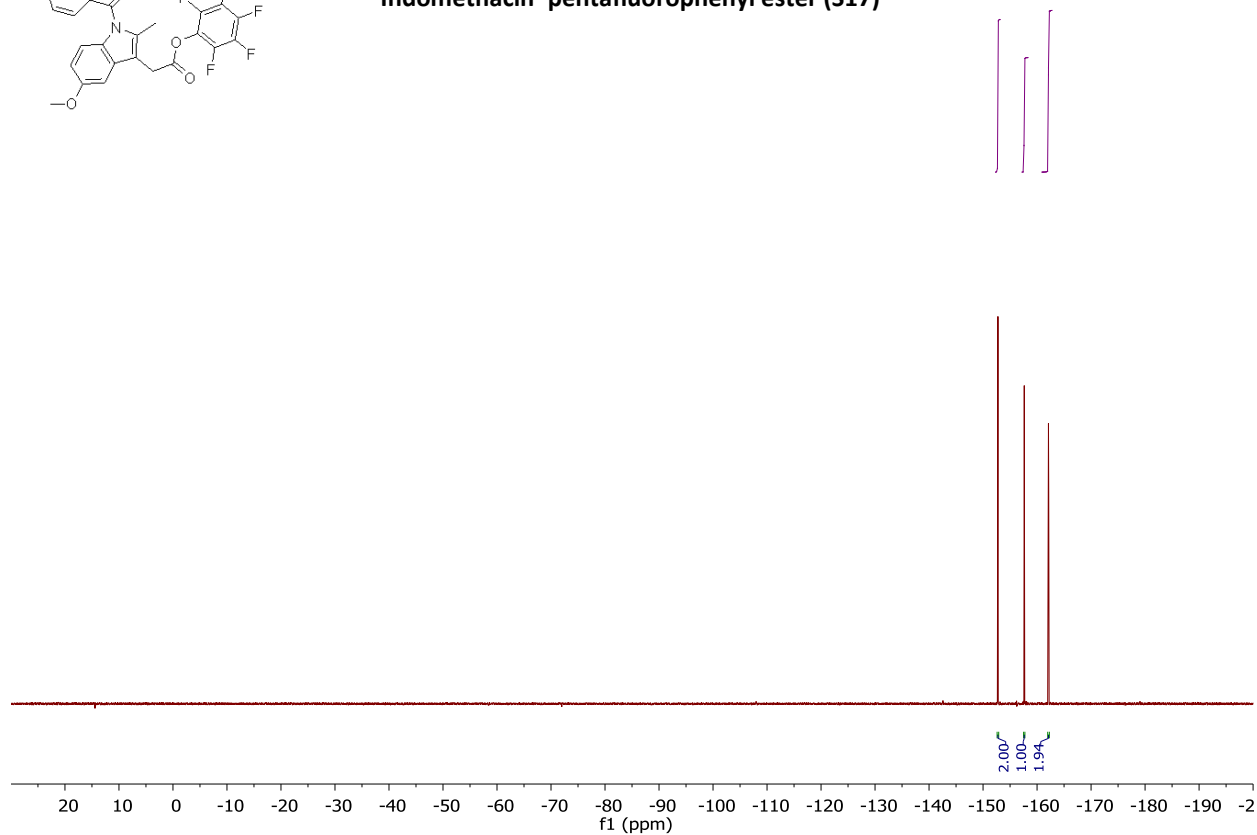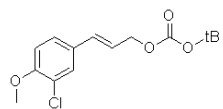

(E)-*tert*-Butyl 3-(3-chloro-4-methoxyphenyl)allyl carbonate (S23)

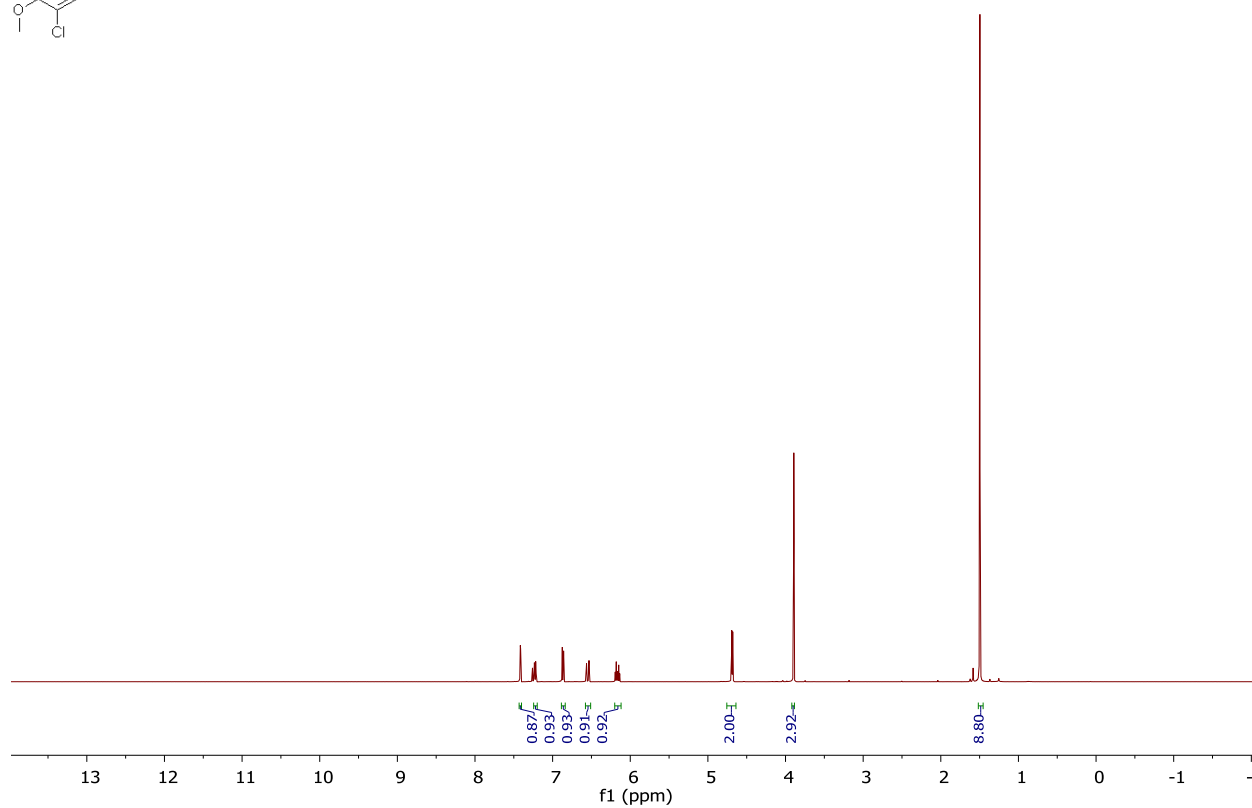

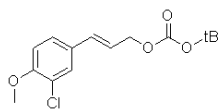

(E)-*tert*-Butyl 3-(3-chloro-4-methoxyphenyl)allyl carbonate (S23)

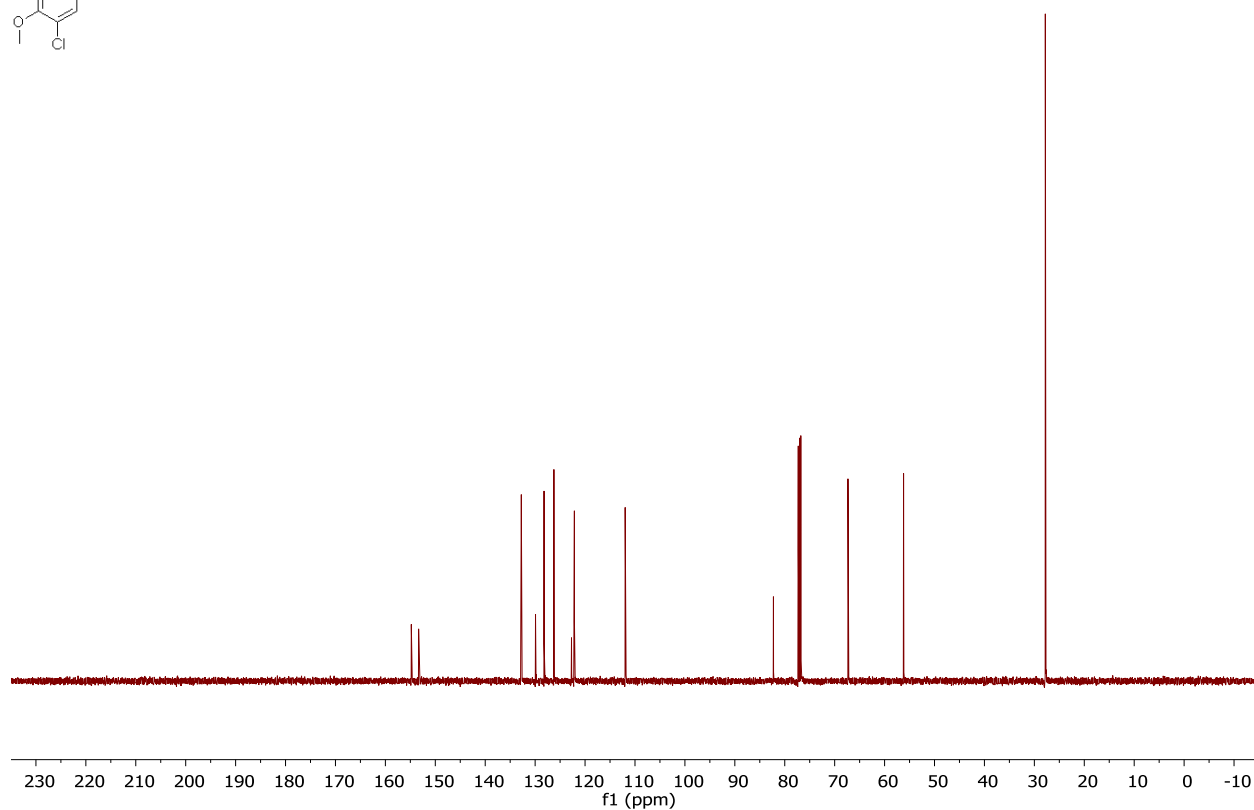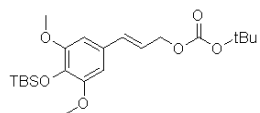

(E)-*tert*-Butyl 3-(4-((*tert*-butyldimethylsilyl)oxy)-3,5-dimethoxyphenyl)allyl carbonate (S24)

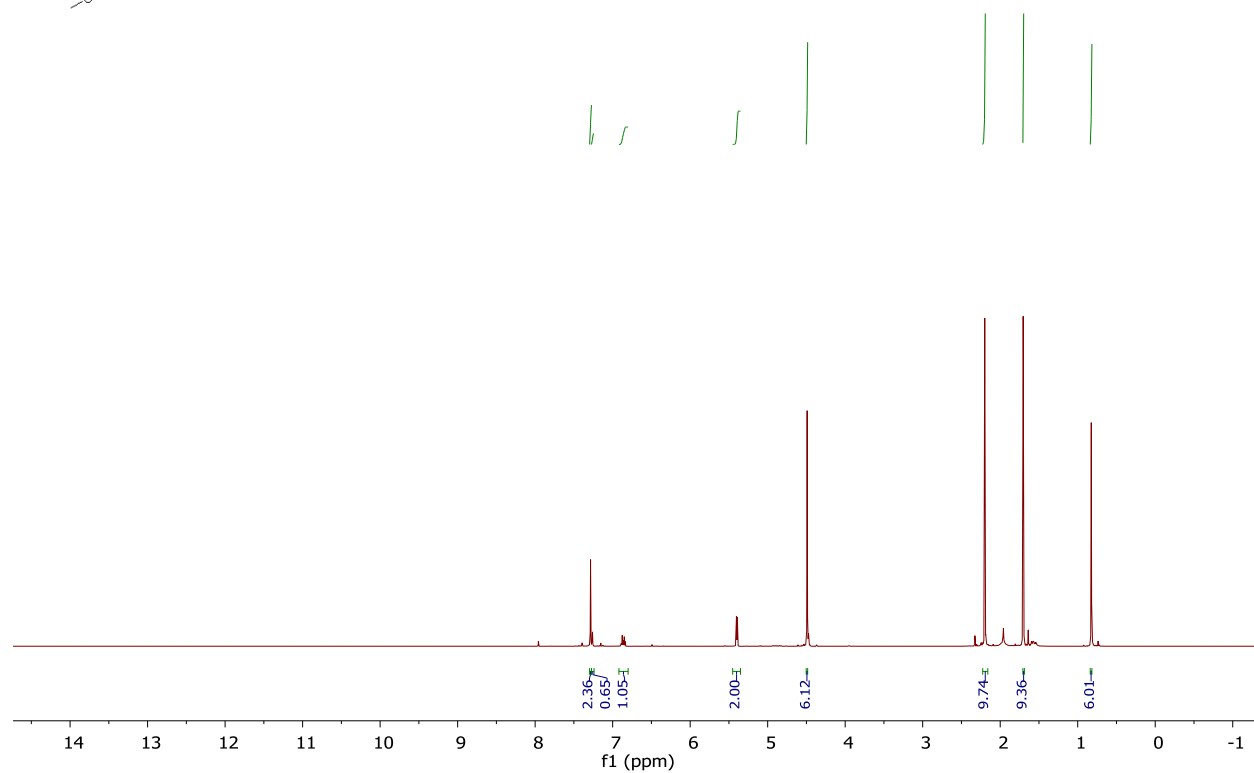

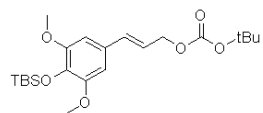

**(E)-tert-Butyl 3-(4-((tert-butyldimethylsilyl)oxy)-3,5-dimethoxyphenyl)allyl carbonate (S24)**

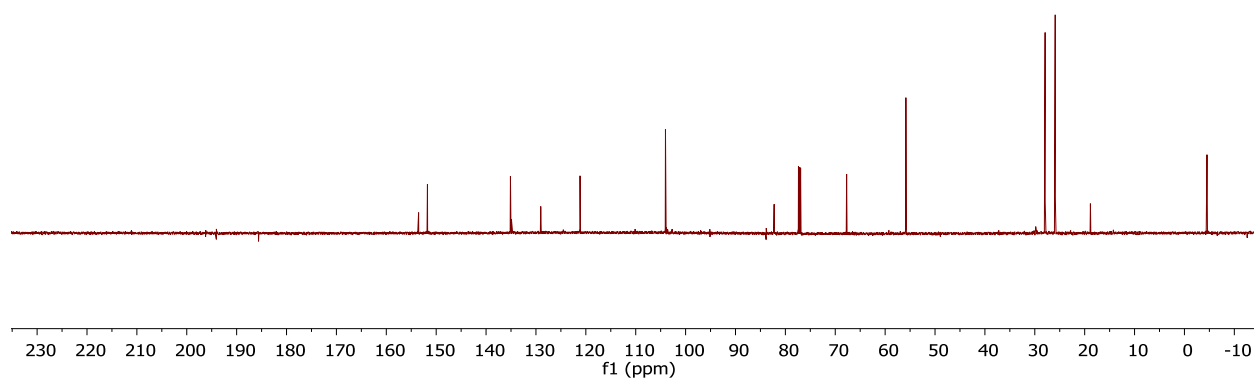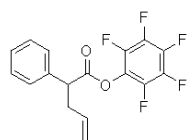

**Pentafluorophenyl 2-phenylpent-4-enoate (6)**

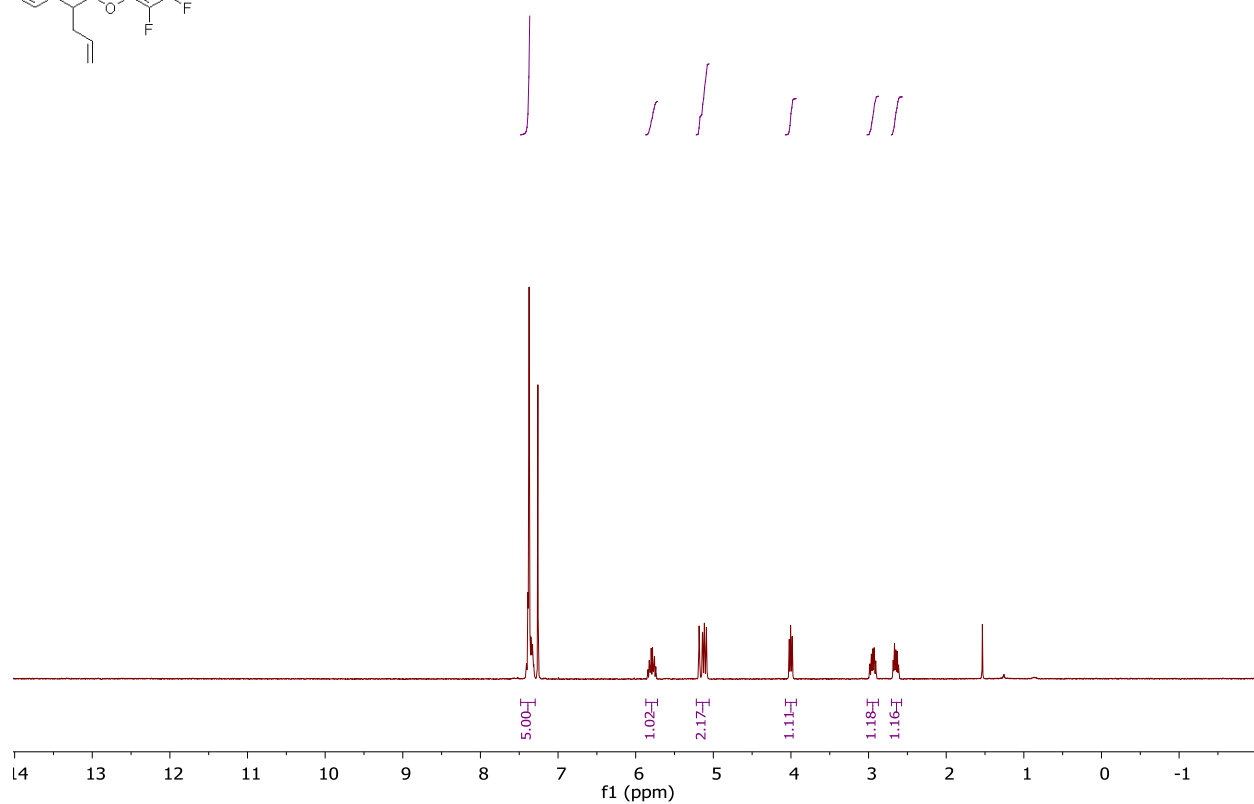



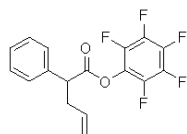

Pentafluorophenyl 2-phenylpent-4-enoate (6)

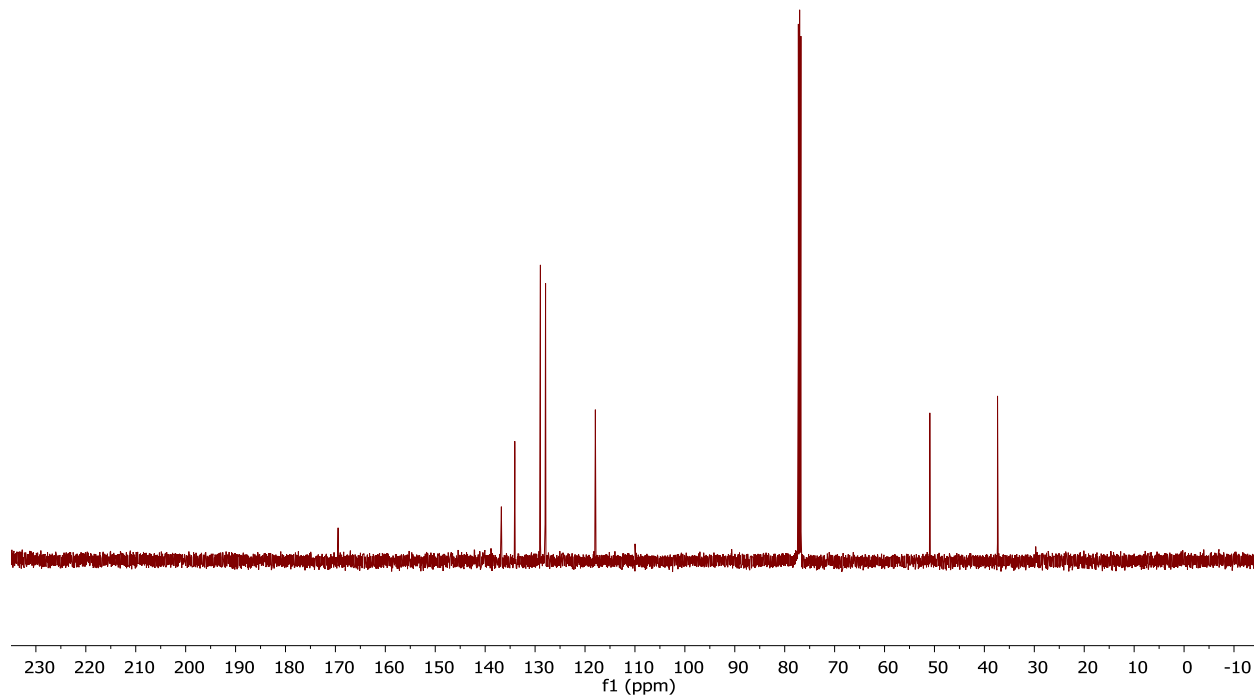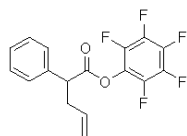

Pentafluorophenyl 2-phenylpent-4-enoate (6)

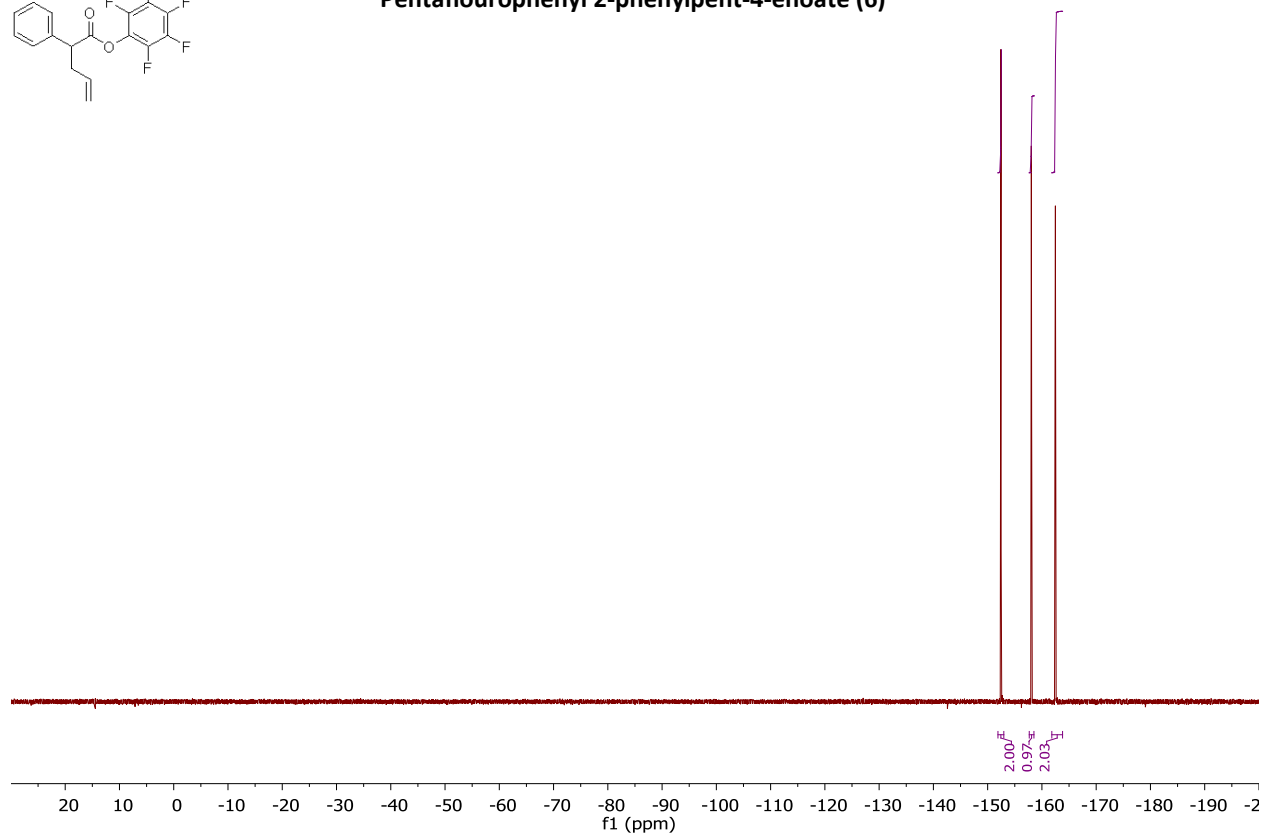

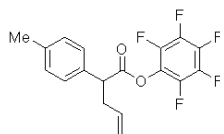

Pentafluorophenyl 2-(4-methylphenyl)pent-4-enoate (7)

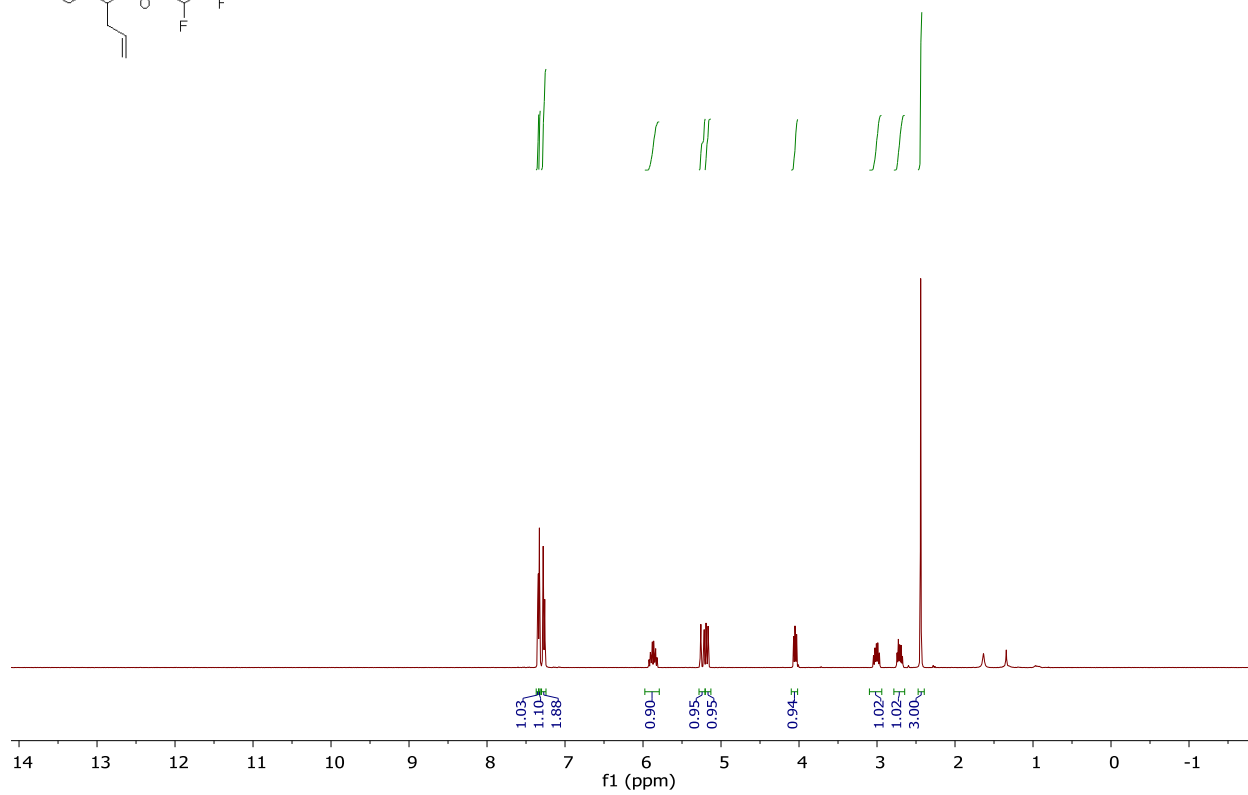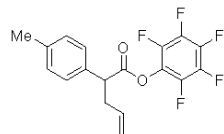

Pentafluorophenyl 2-(4-methylphenyl)pent-4-enoate (7)

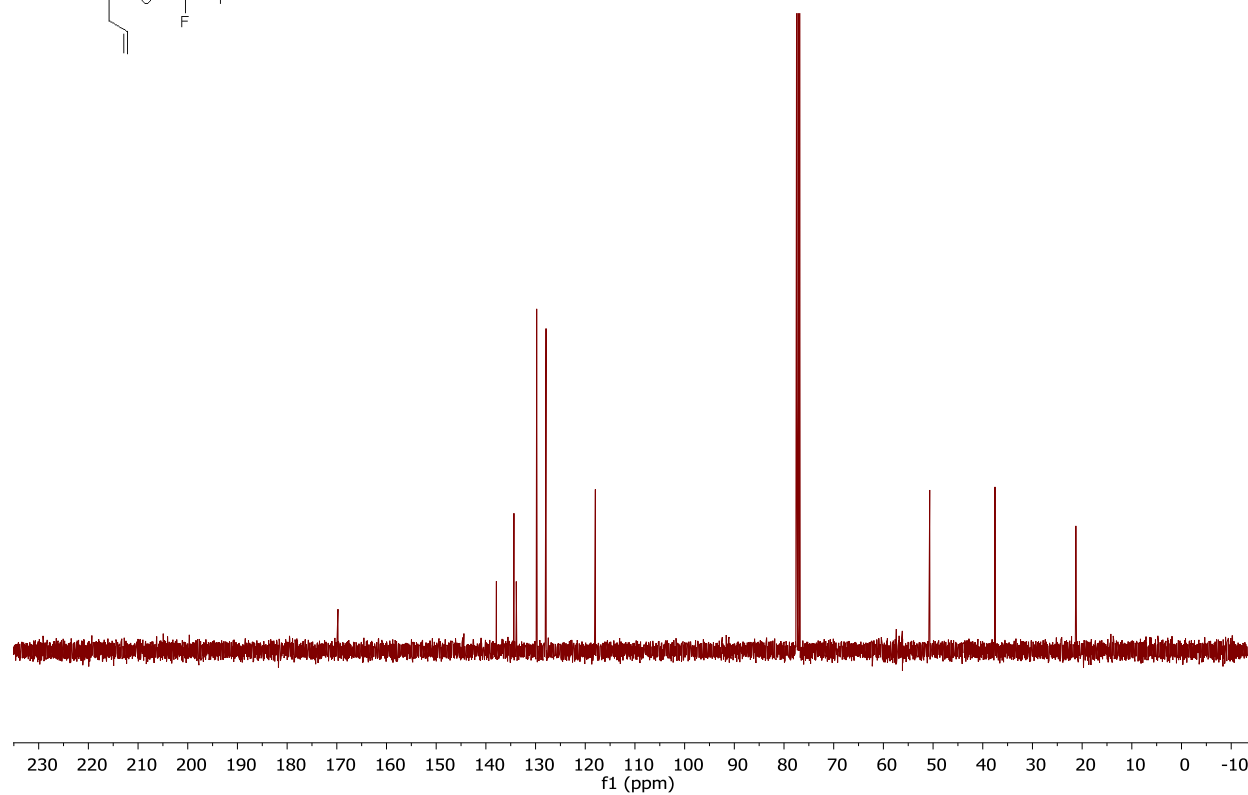

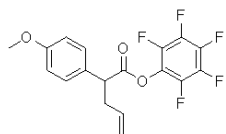

Pentafluorophenyl 2-(4-methoxyphenyl)pent-4-enoate (8)

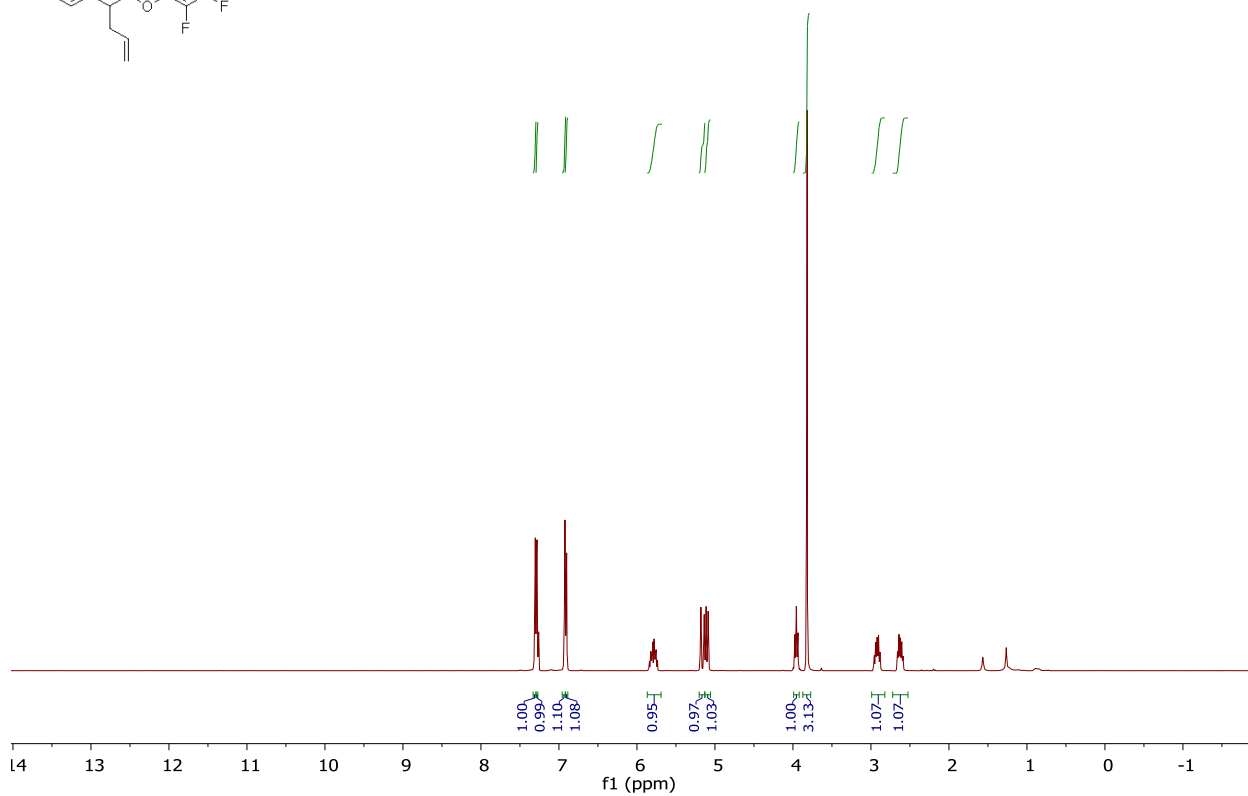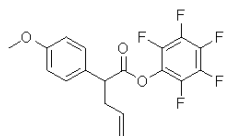

Pentafluorophenyl 2-(4-methoxyphenyl)pent-4-enoate (8)

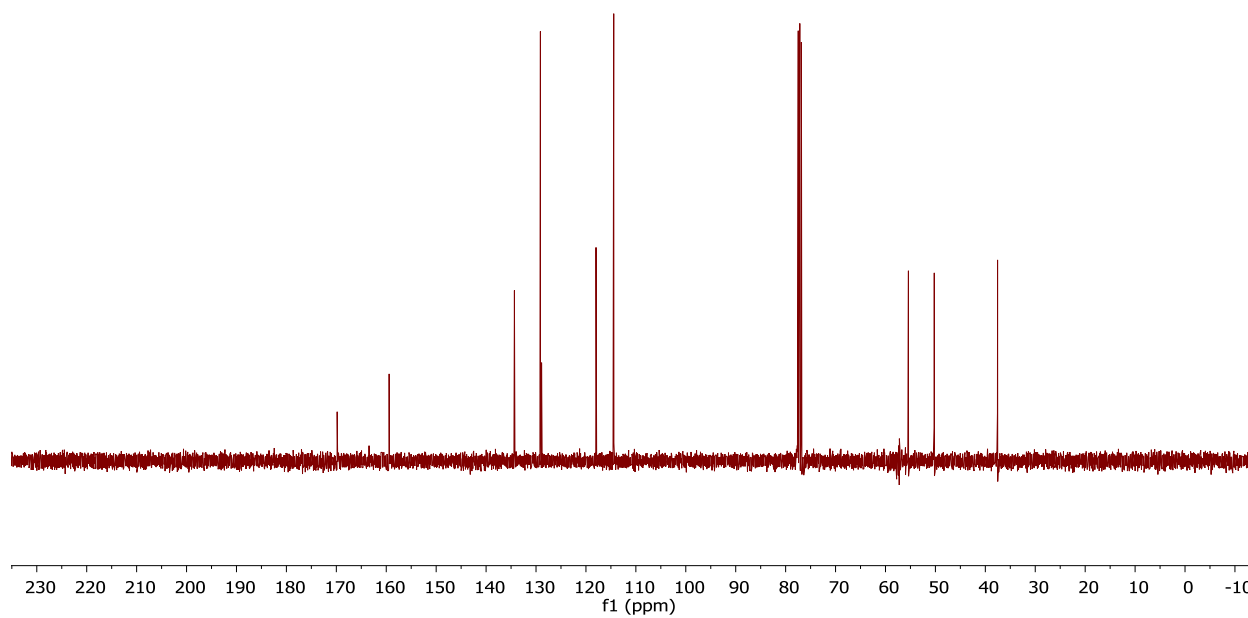

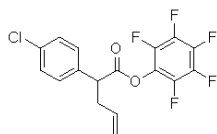

Pentafluorophenyl 2-(4-chlorophenyl)pent-4-enoate (9)

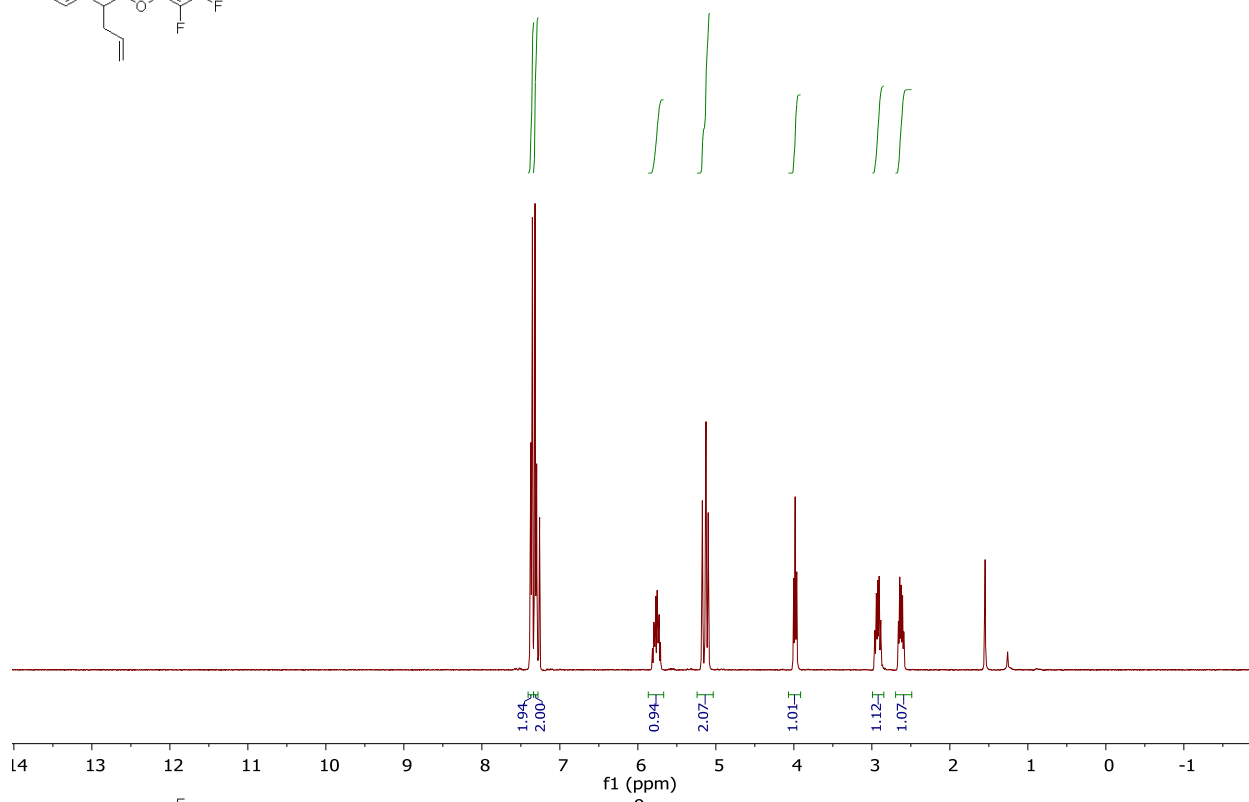

Pentafluorophenyl 2-(4-chlorophenyl)pent-4-enoate (9)

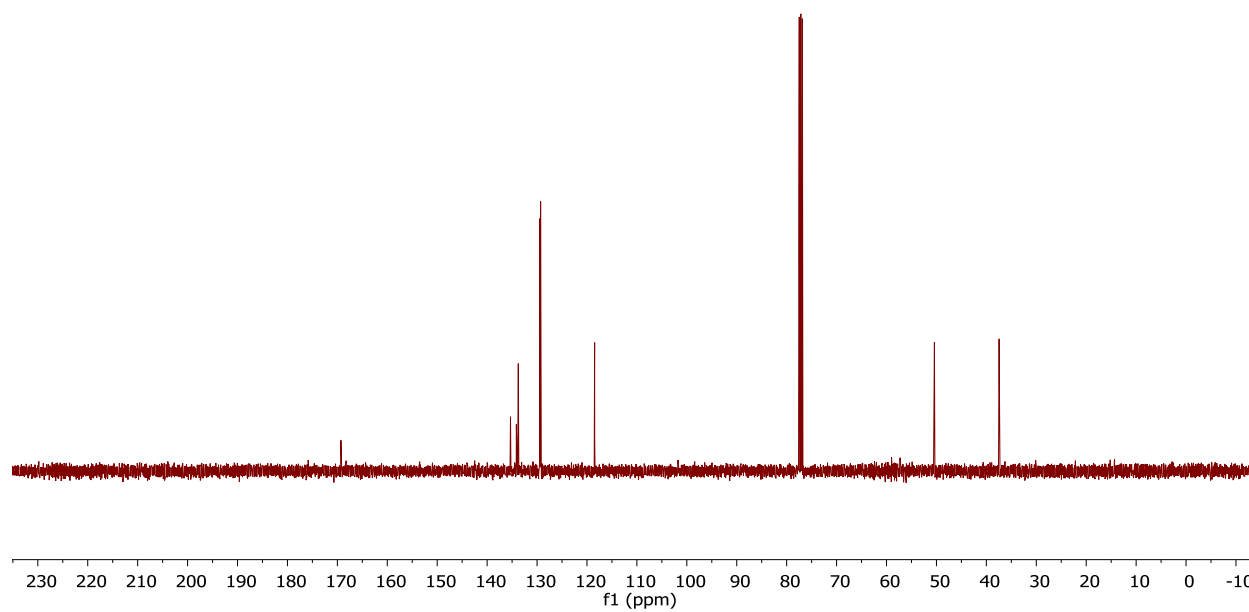

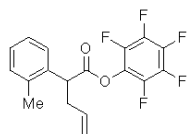

Pentafluorophenyl 2-(2-methylphenyl)pent-4-enoate (10)

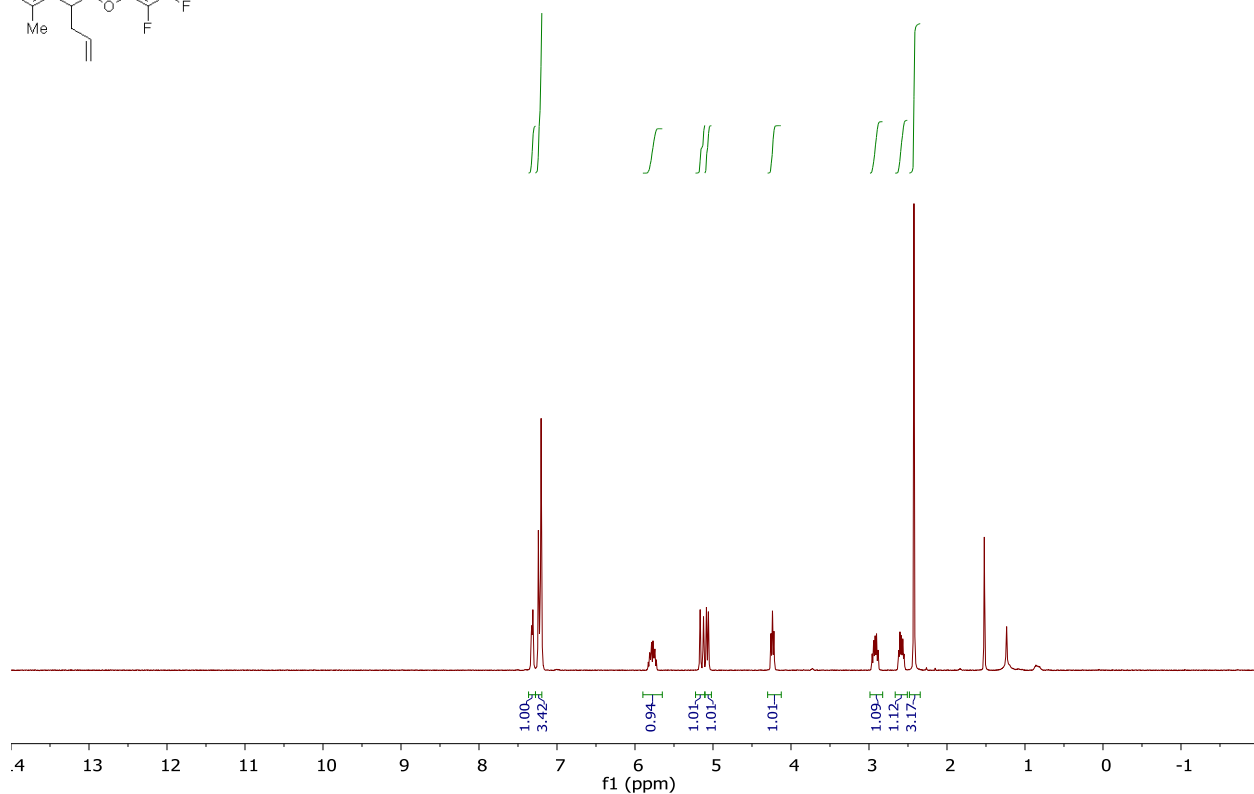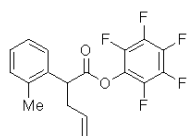

Pentafluorophenyl 2-(2-methylphenyl)pent-4-enoate (10)

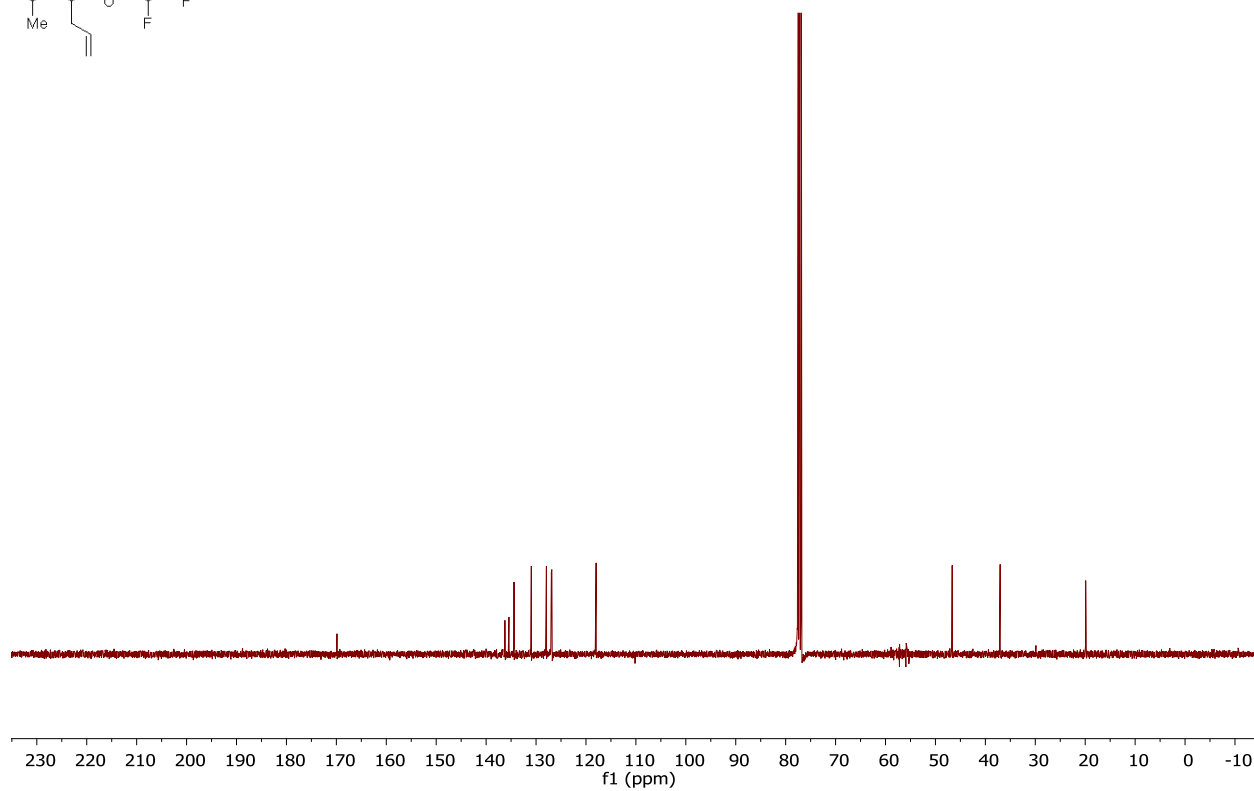

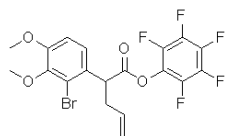

Pentafluorophenyl 2-(3,4-dimethoxy-2-bromophenyl)pent-4-enoate (11)

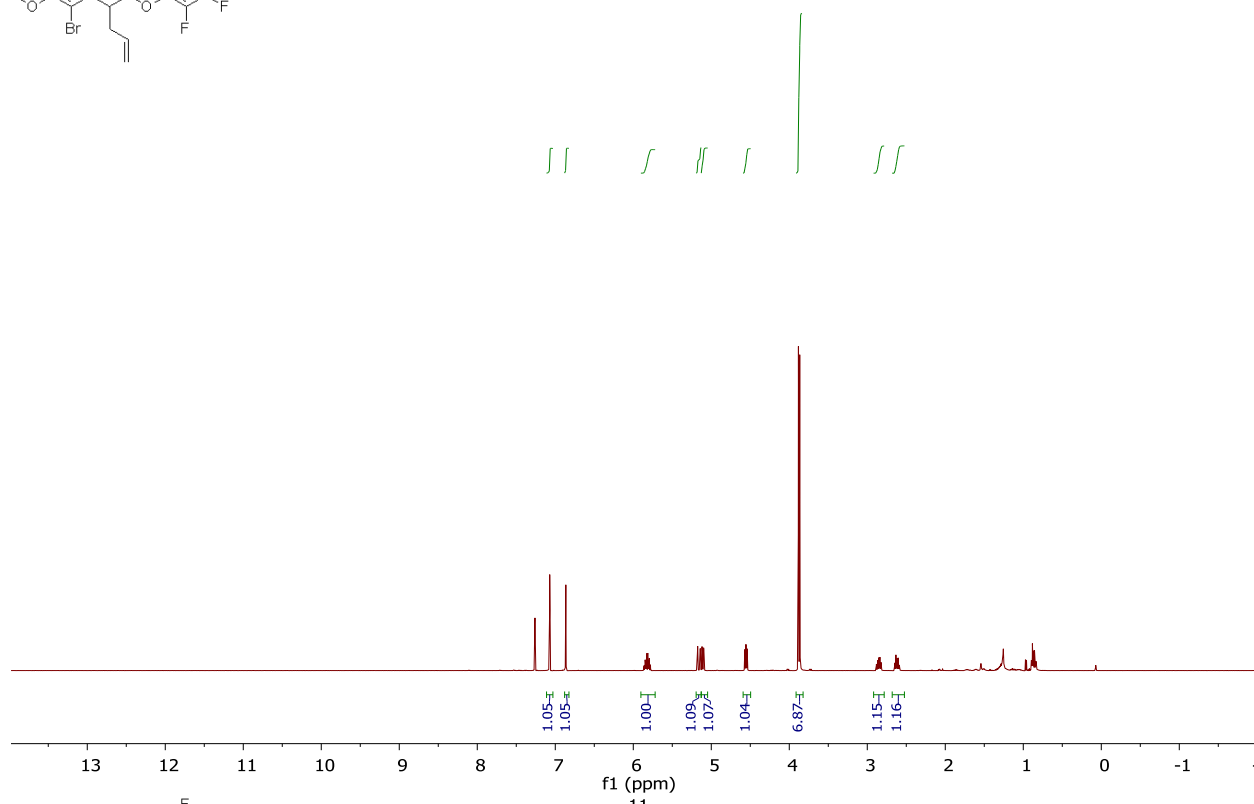

Pentafluorophenyl 2-(3,4-dimethoxy-2-bromophenyl)pent-4-enoate (11)

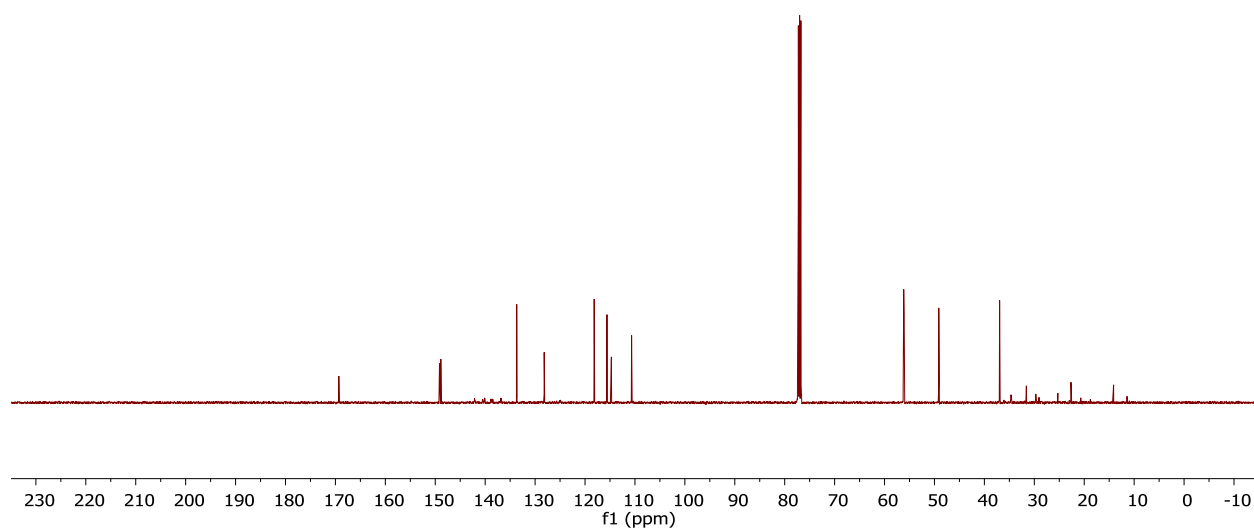

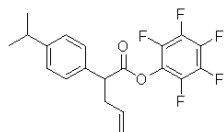

Pentafluorophenyl 2-(4-isopropylphenyl)pent-4-enoate (12)

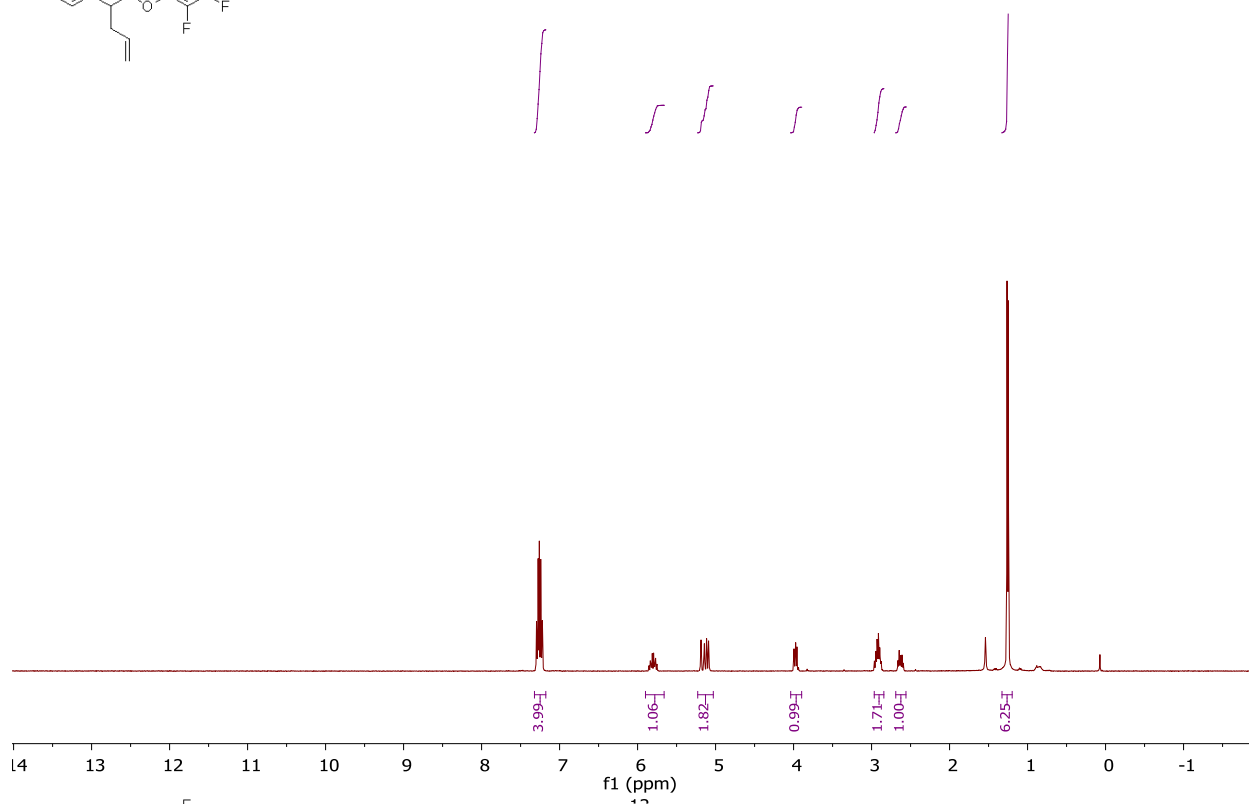

Pentafluorophenyl 2-(4-isopropylphenyl)pent-4-enoate (12)

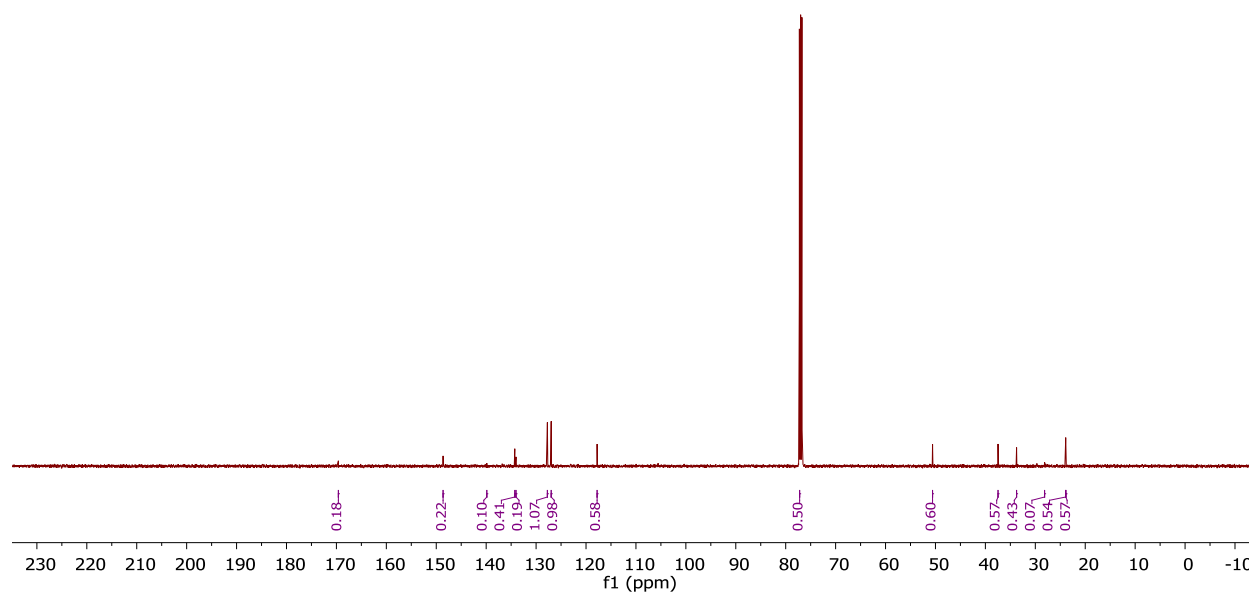

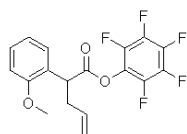

Pentafluorophenyl 2-(2-methoxyphenyl)pent-4-enoate (13)

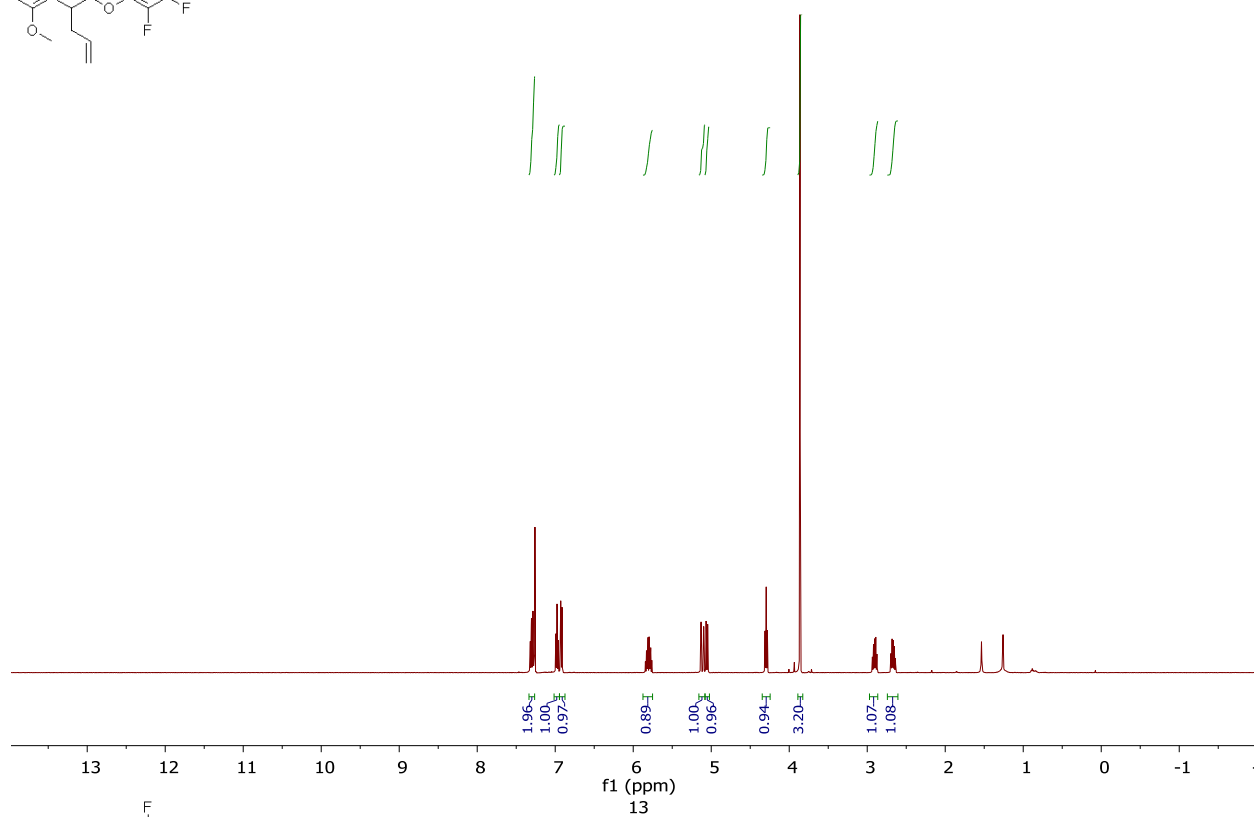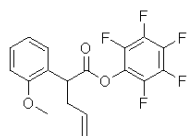

Pentafluorophenyl 2-(2-methoxyphenyl)pent-4-enoate (13)

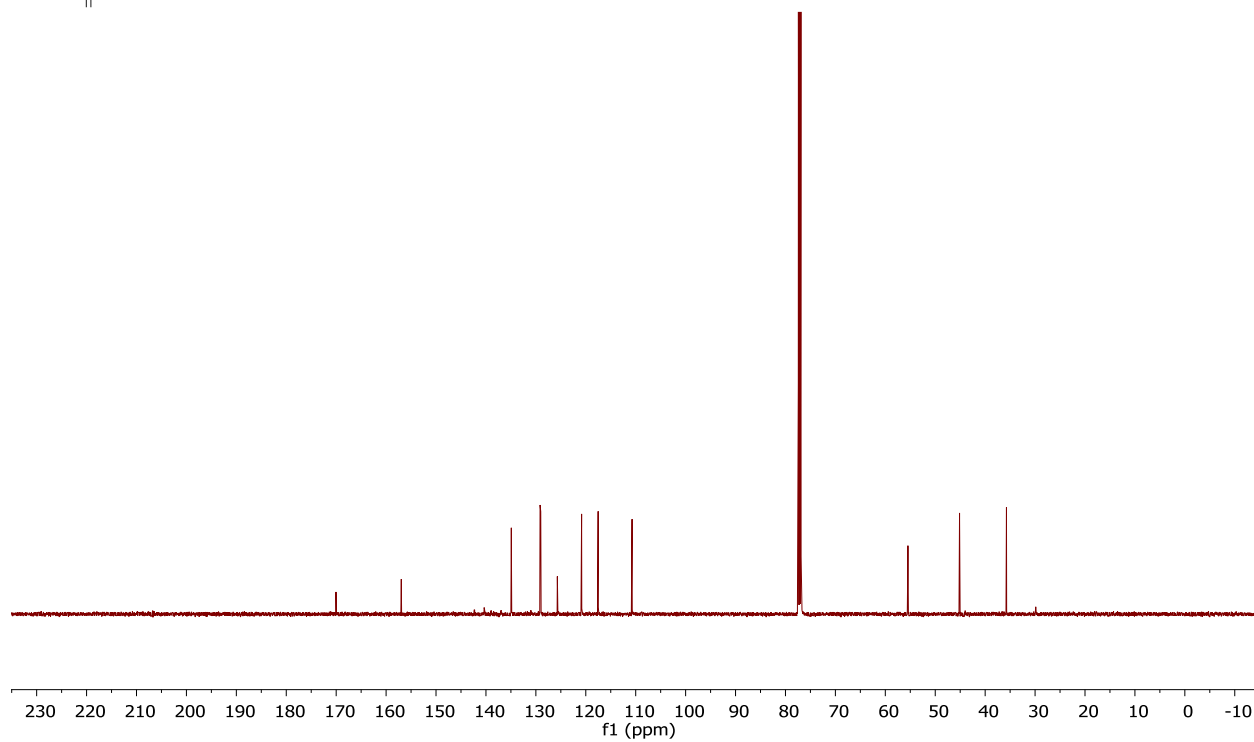



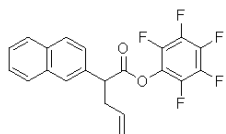

Pentafluorophenyl 2-(naphthalene-2-yl)pent-4-enoate (14)

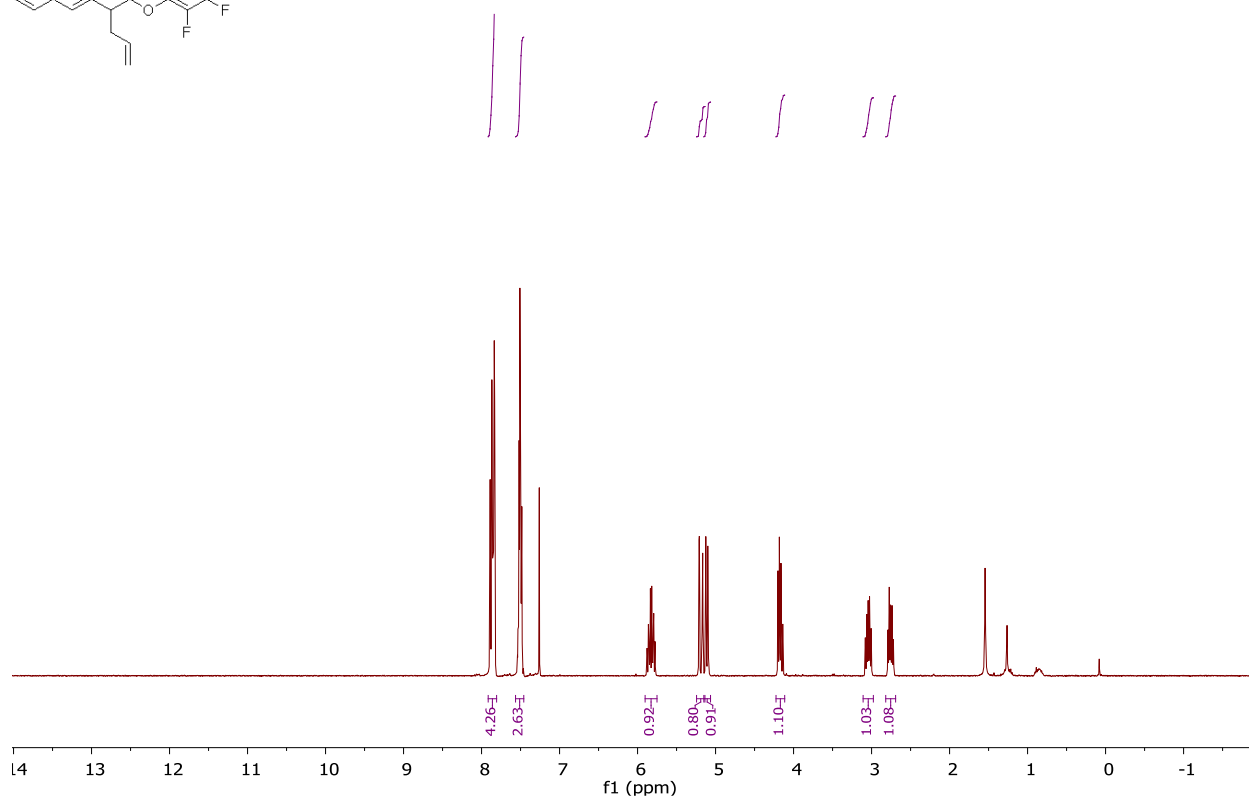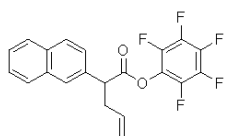

Pentafluorophenyl 2-(naphthalene-2-yl)pent-4-enoate (14)

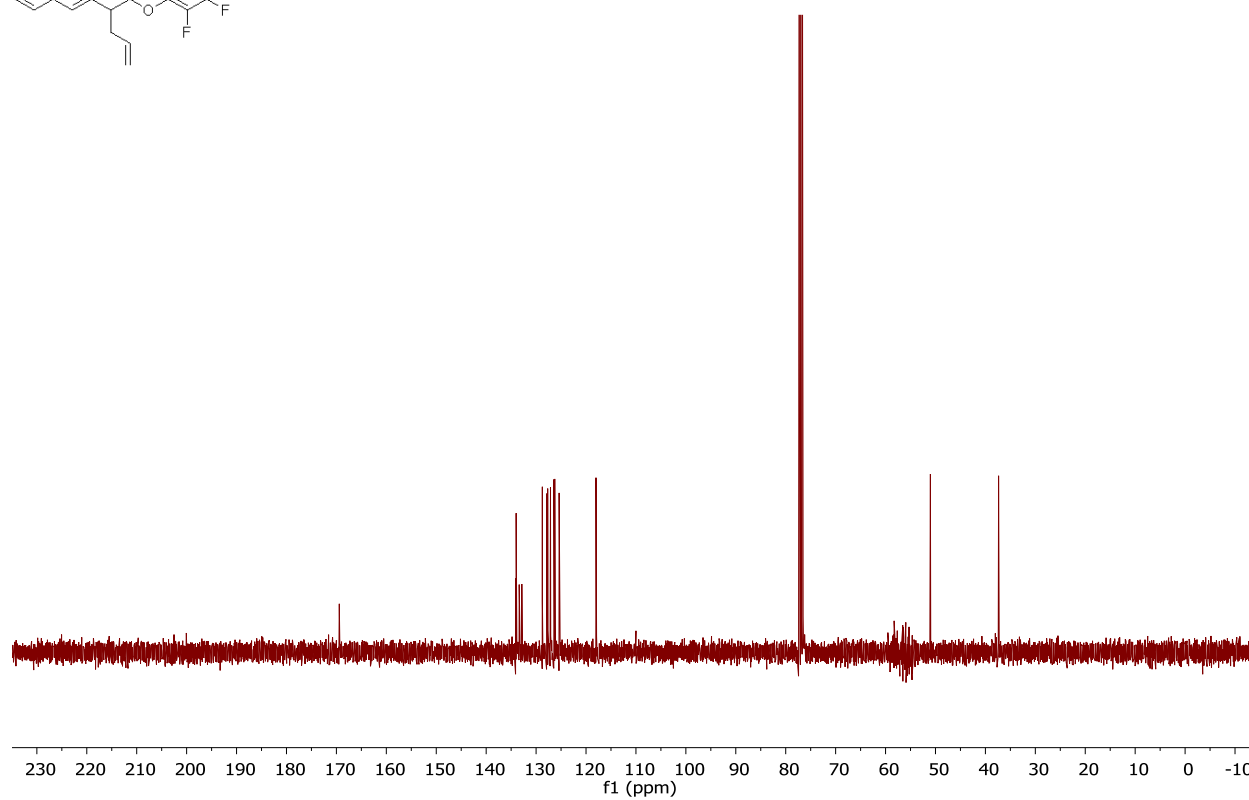

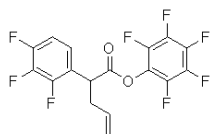

Pentafluorophenyl 2-(2,3,4-trifluorophenyl)pent-4-enoate (15)

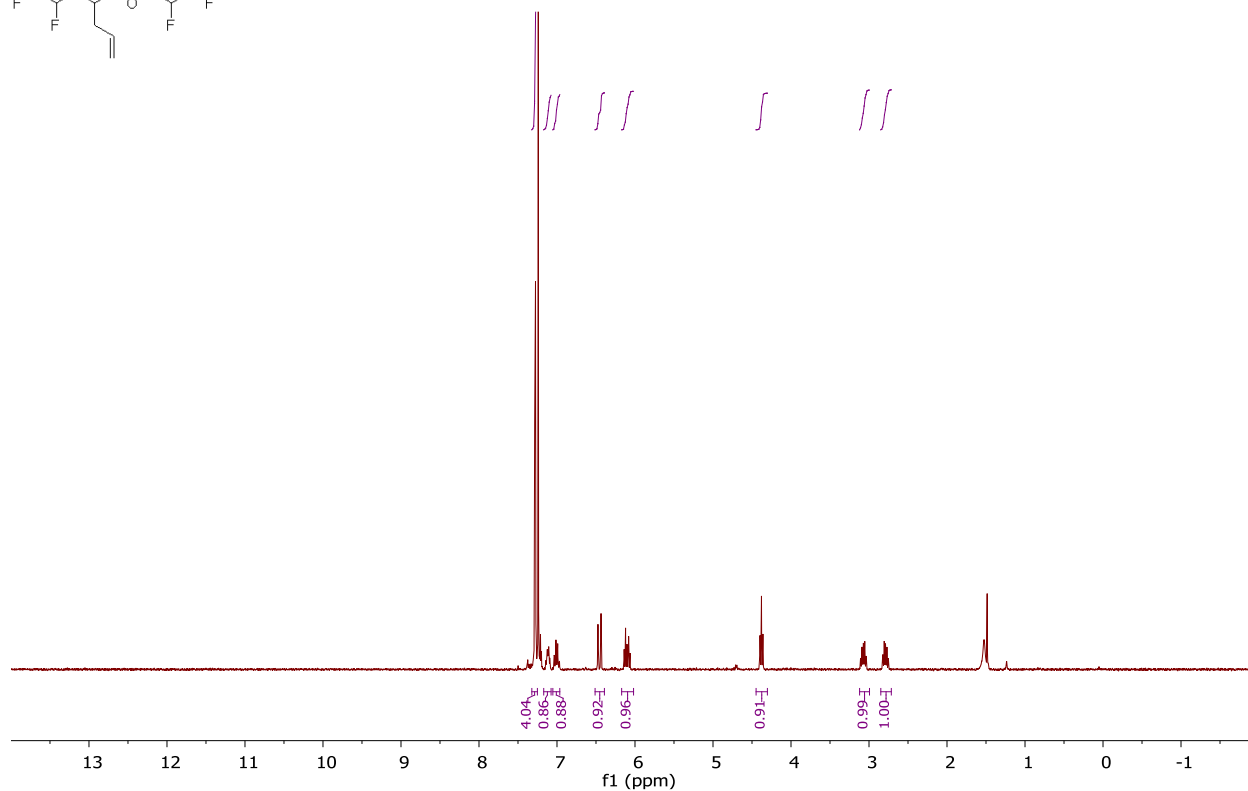

Pentafluorophenyl 2-(2,3,4-trifluorophenyl)pent-4-enoate (15)

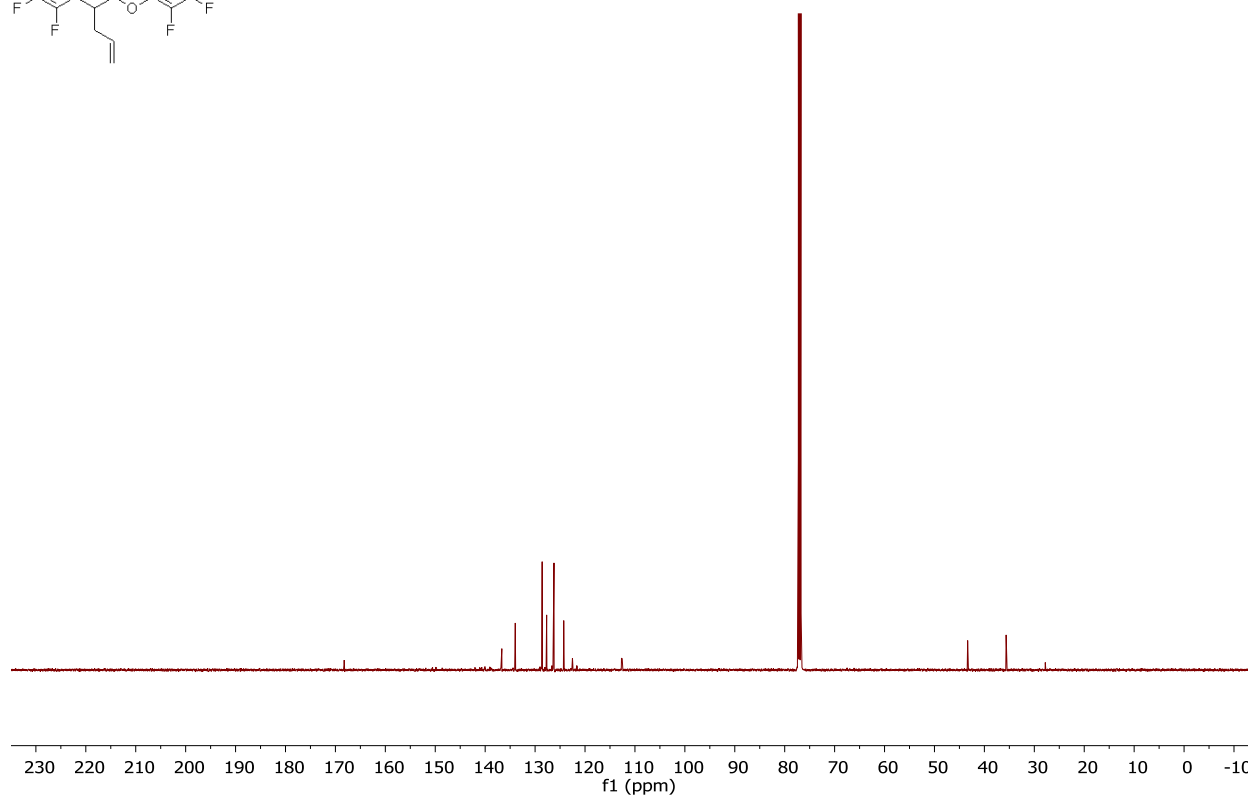

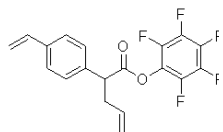

Pentafluorophenyl 2-(4-vinylphenyl)pent-4-enoate (16)

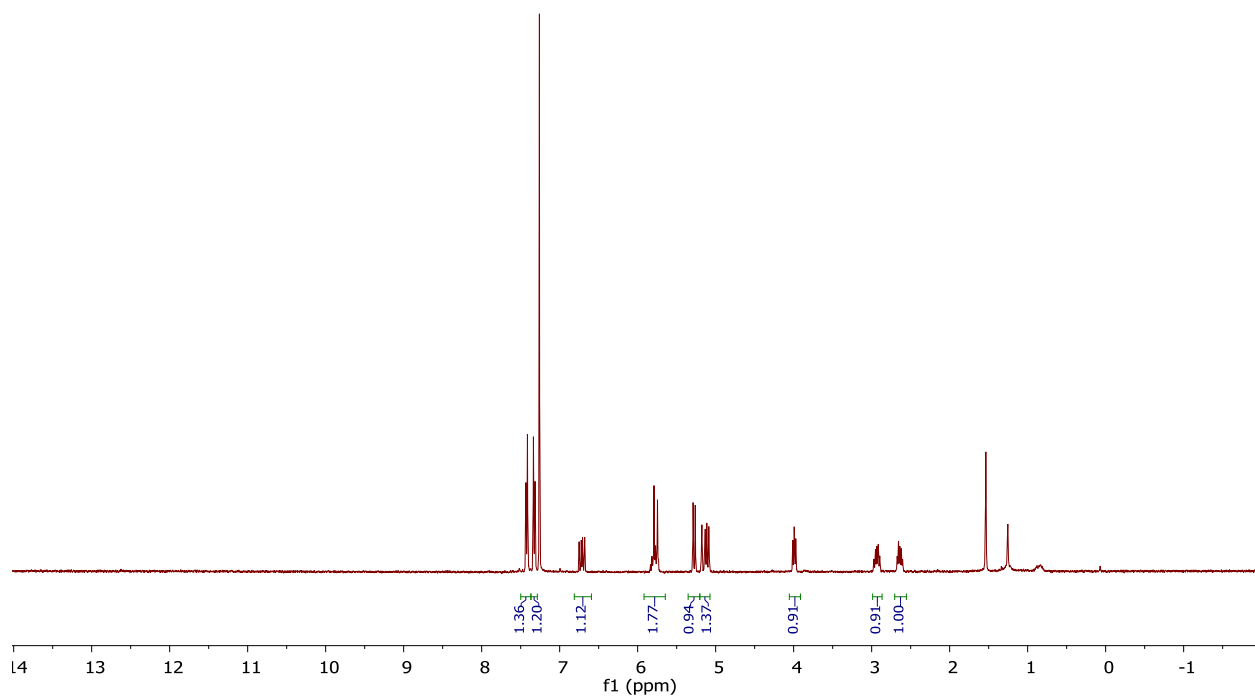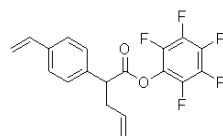

Pentafluorophenyl 2-(4-vinylphenyl)pent-4-enoate (16)

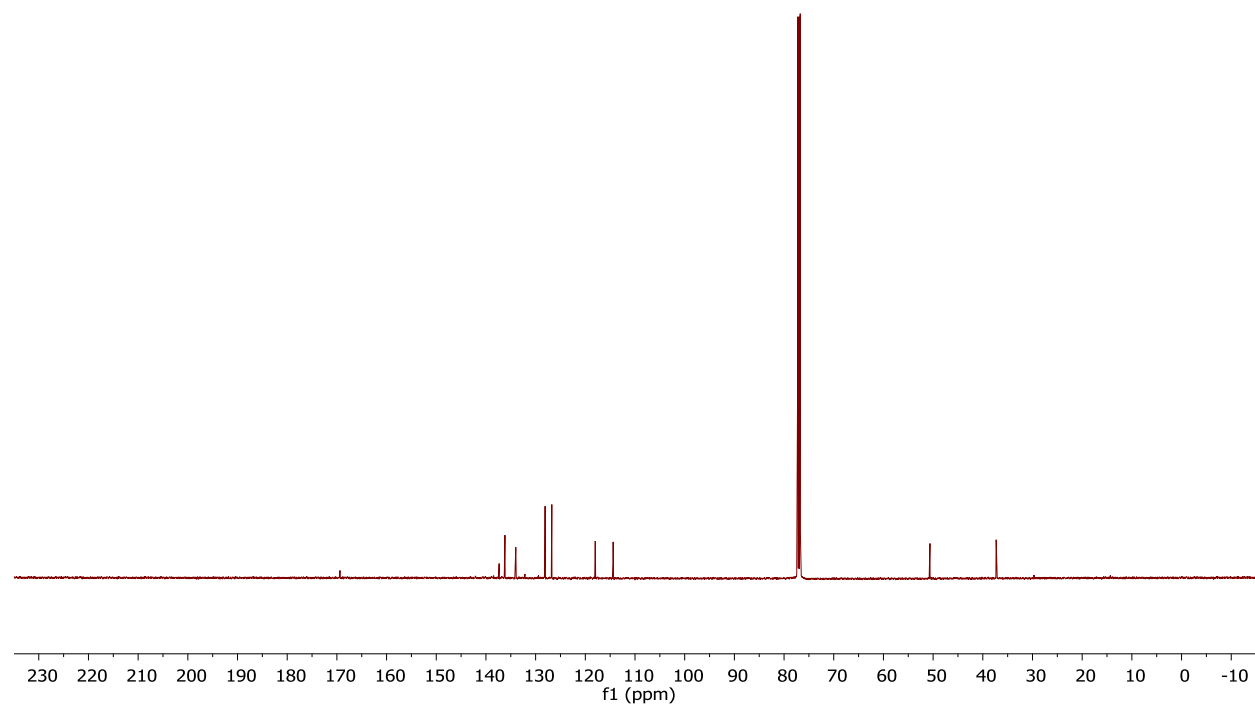

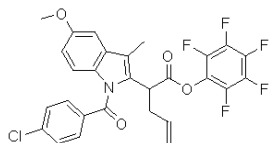

Pentafluorophenyl 2-(1-(4-chlorobenzoyl)-5-methoxy-1*H*-indol-2-yl)pent-4-enoate (17)

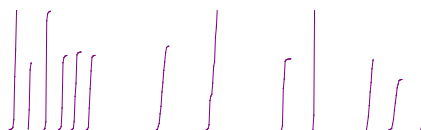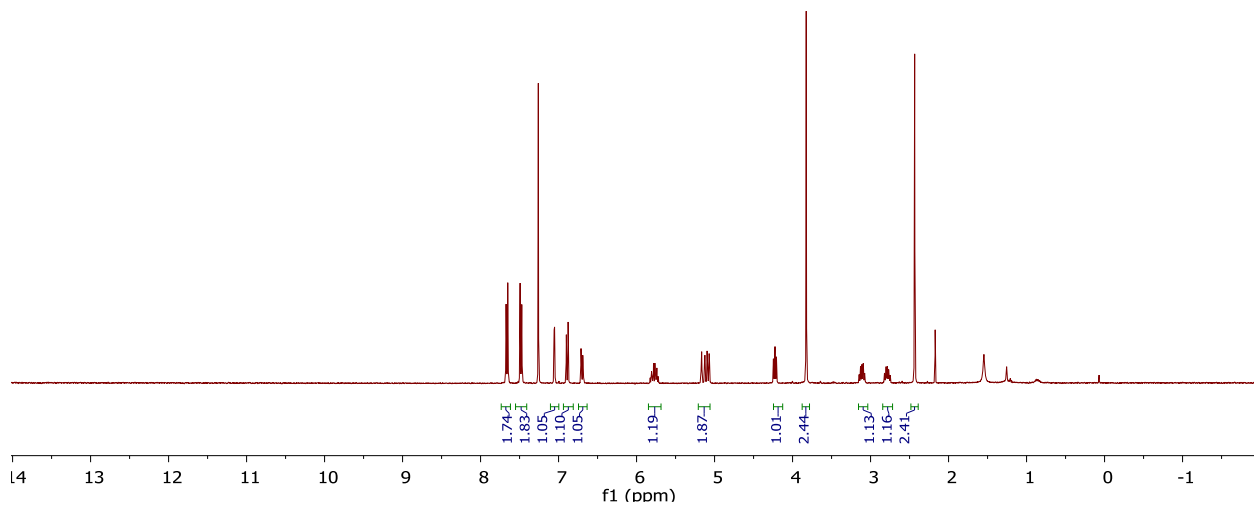

Pentafluorophenyl 2-(1-(4-chlorobenzoyl)-5-methoxy-1*H*-indol-2-yl)pent-4-enoate (17)

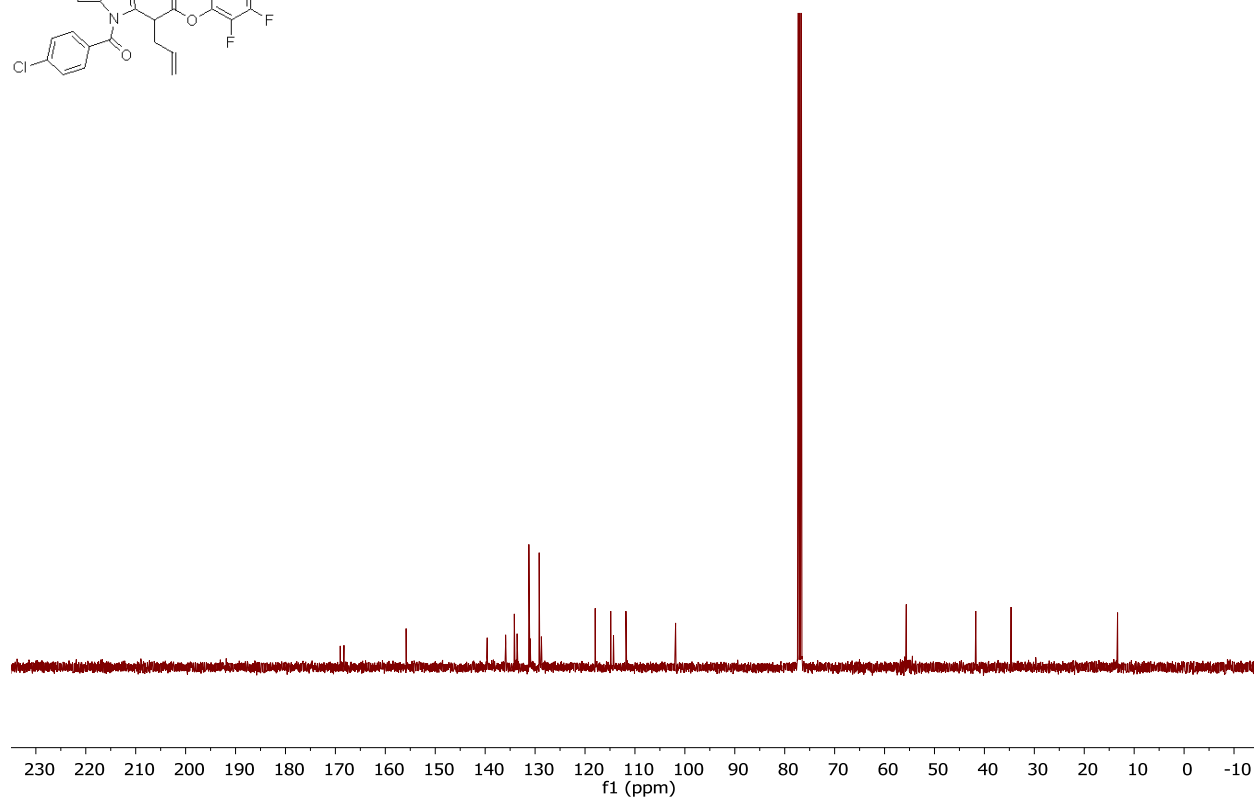

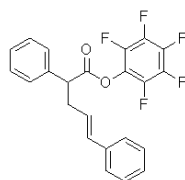

Pentafluorophenyl (E)-2,5-diphenylpent-4-enoate (18)

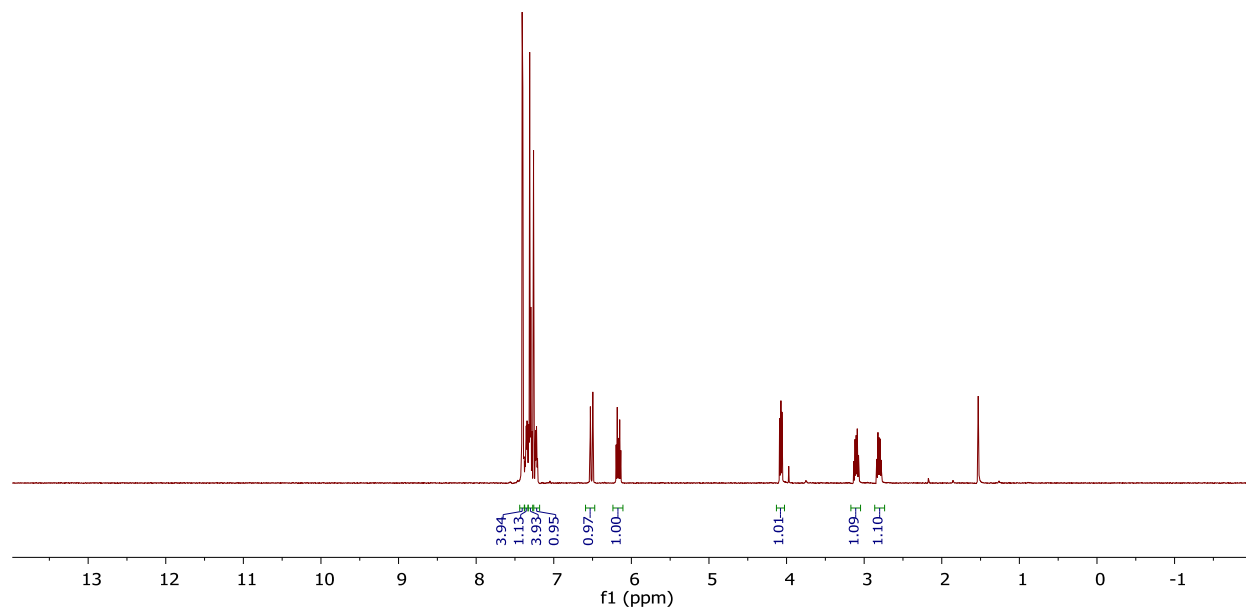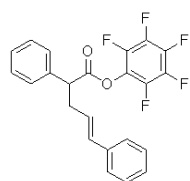

Pentafluorophenyl (E)-2,5-diphenylpent-4-enoate (18)

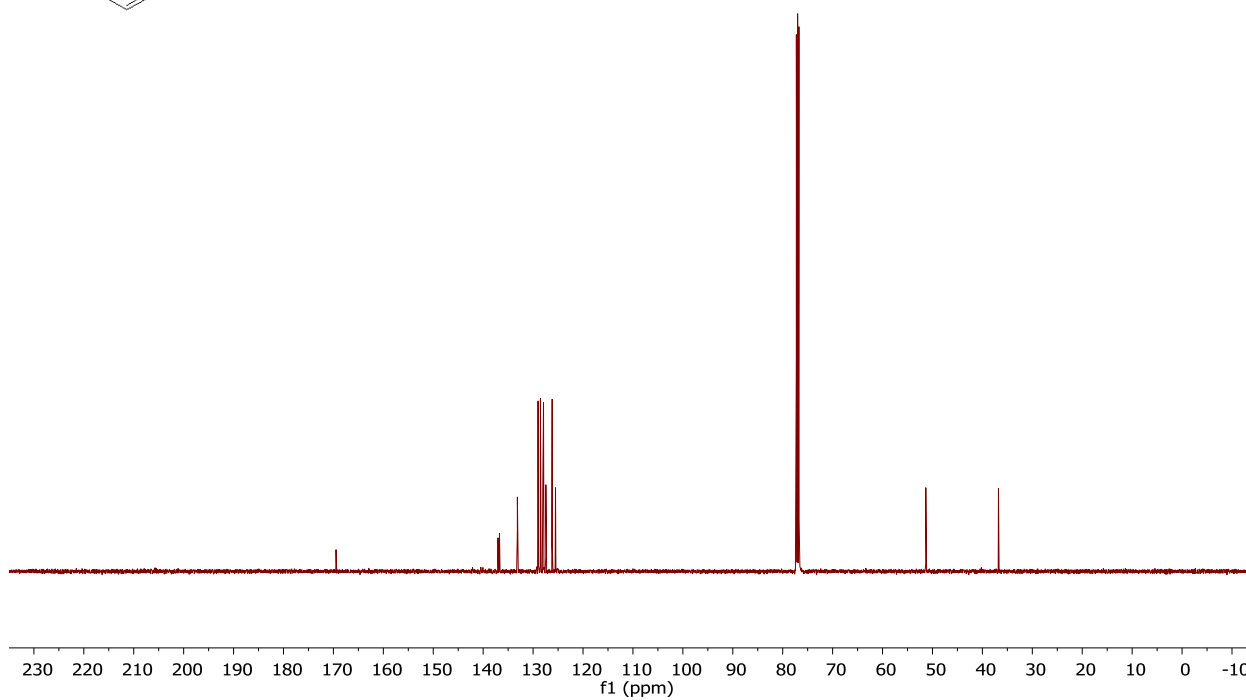

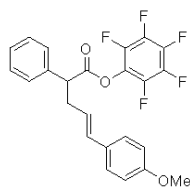

Pentafluorophenyl (E)-2-phenyl-5-(4-(methoxy)phenyl)pent-4-enoate (19)

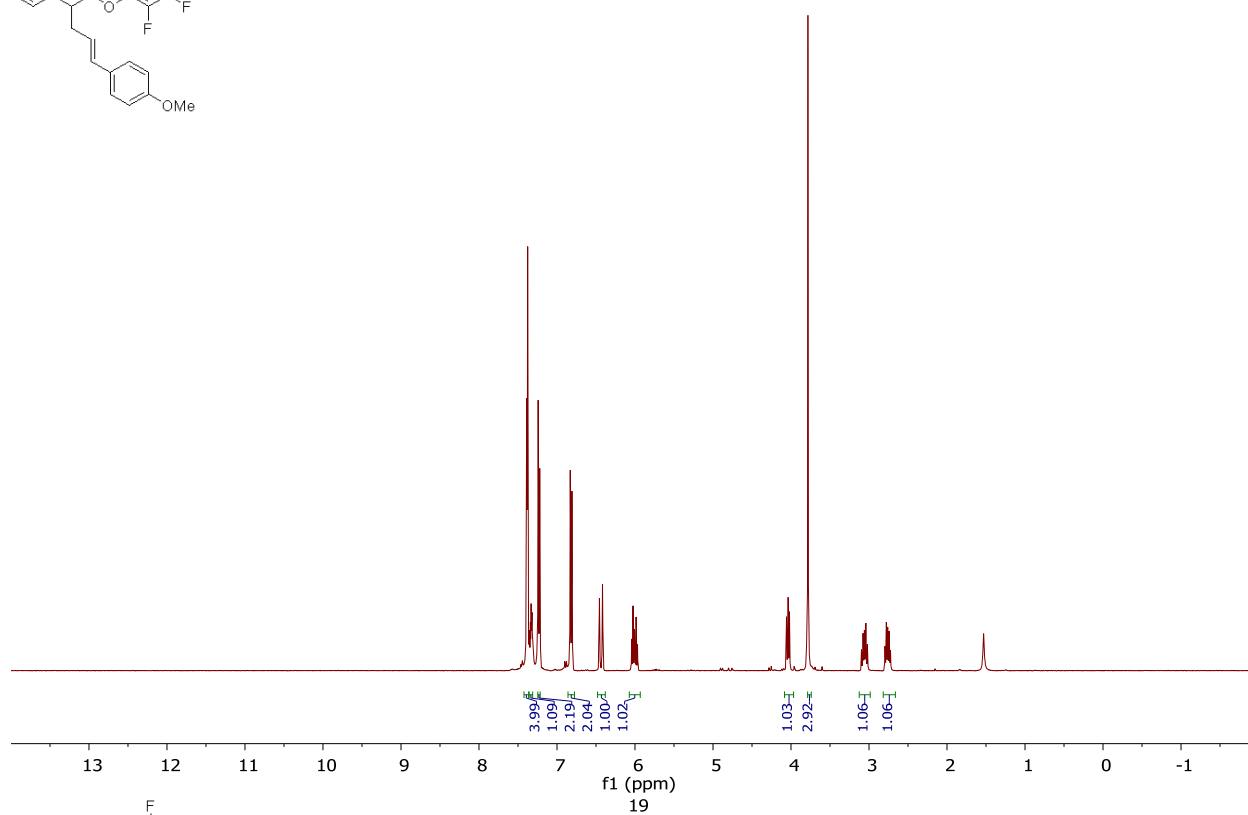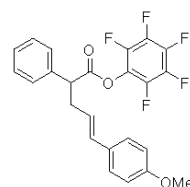

Pentafluorophenyl (E)-2-phenyl-5-(4-(methoxy)phenyl)pent-4-enoate (19)

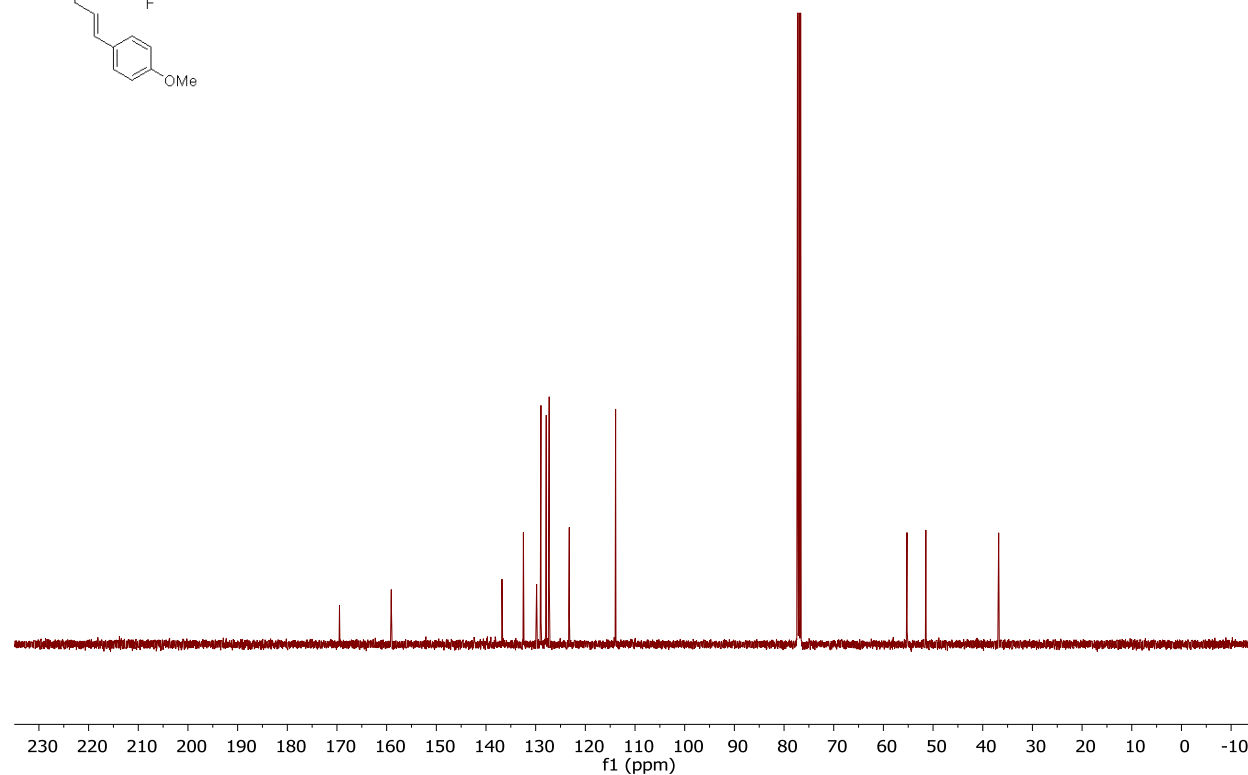

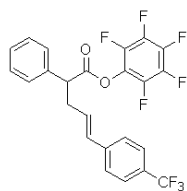

Pentafluorophenyl (E)-2-phenyl-5-(4-(trifluoromethyl)phenyl)pent-4-enoate (20)

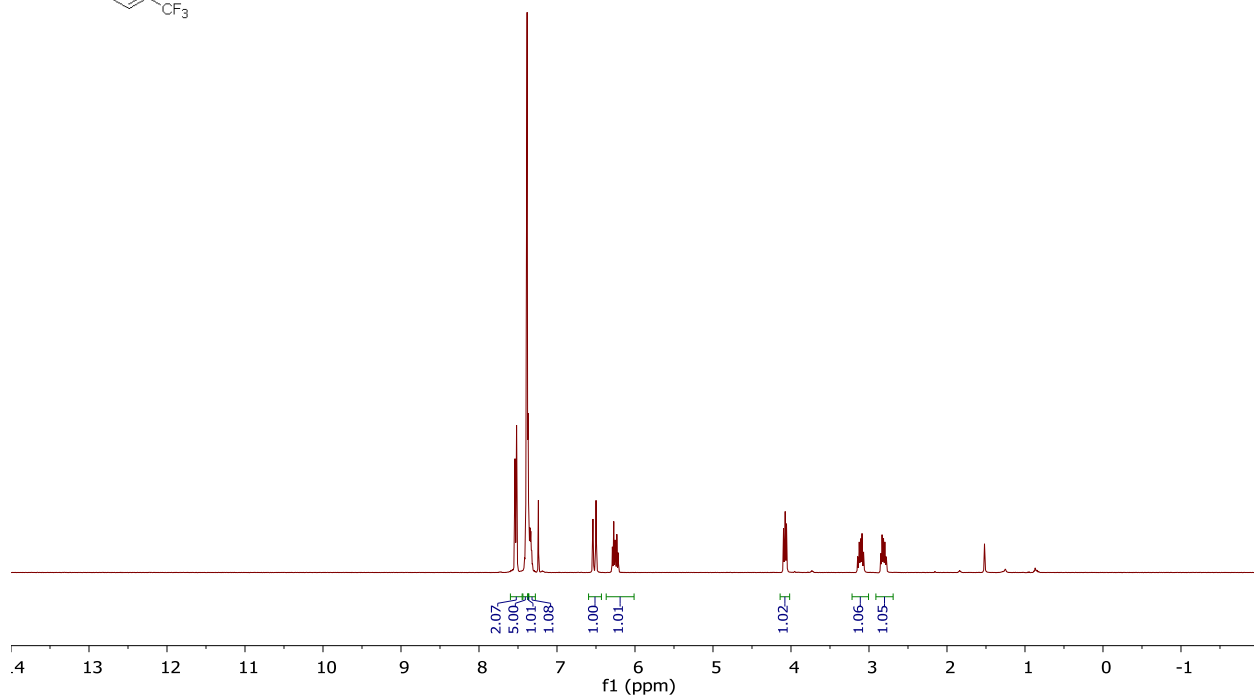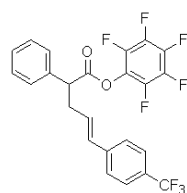

Pentafluorophenyl (E)-2-phenyl-5-(4-(trifluoromethyl)phenyl)pent-4-enoate (20)

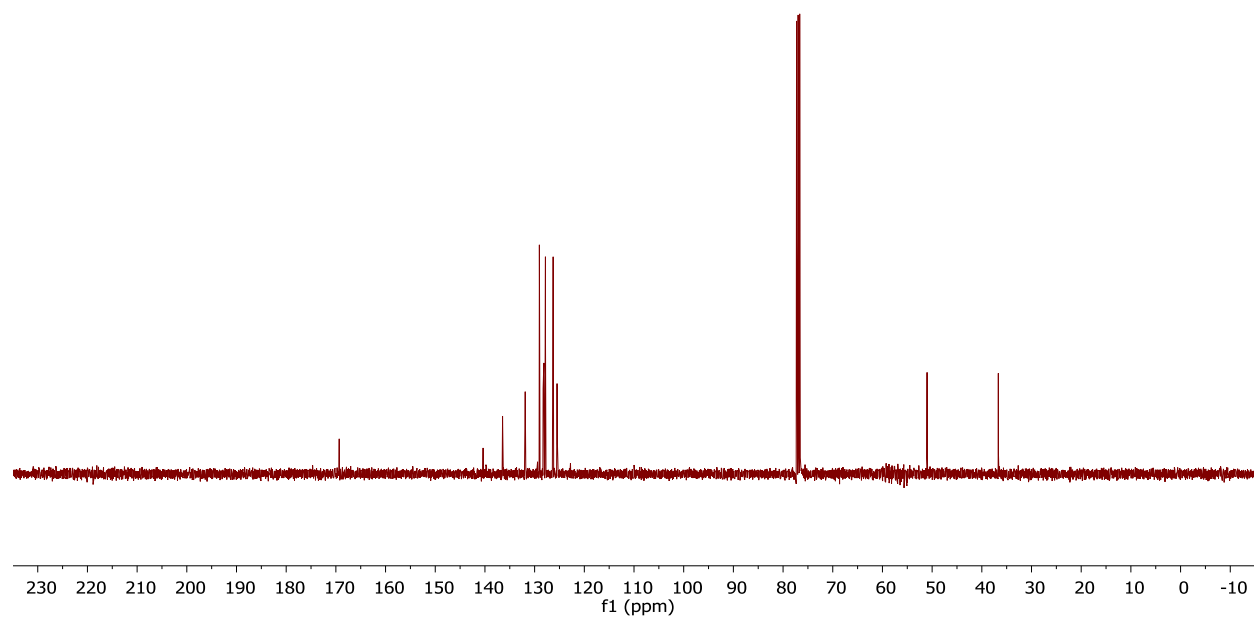

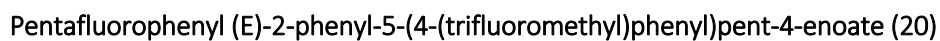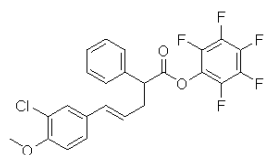

Pentafluorophenyl (E)-5-(3-chloro-4-methoxyphenyl)-2-phenylpent-4-enoate (21)

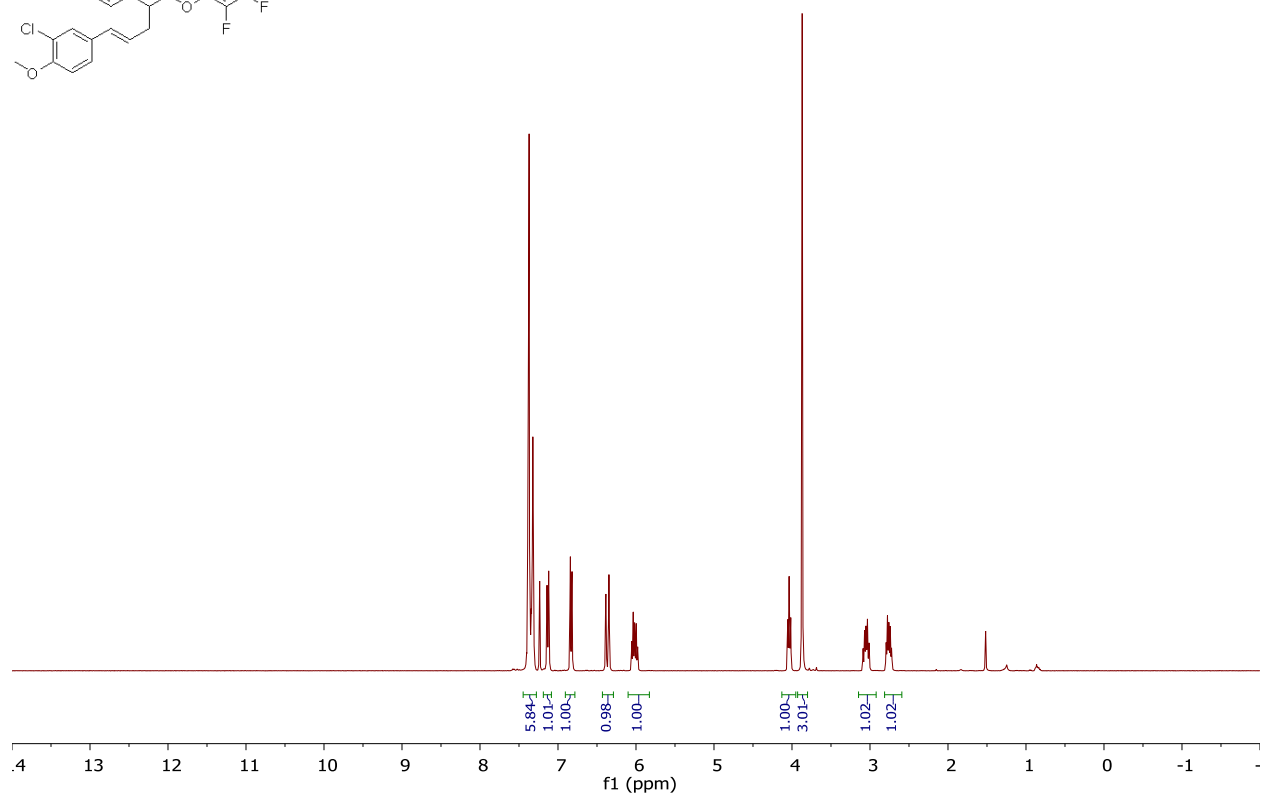



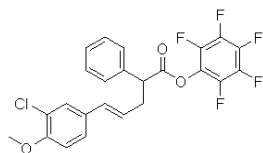

Pentafluorophenyl (E)-5-(3-chloro-4-methoxyphenyl)-2-phenylpent-4-enoate (21)

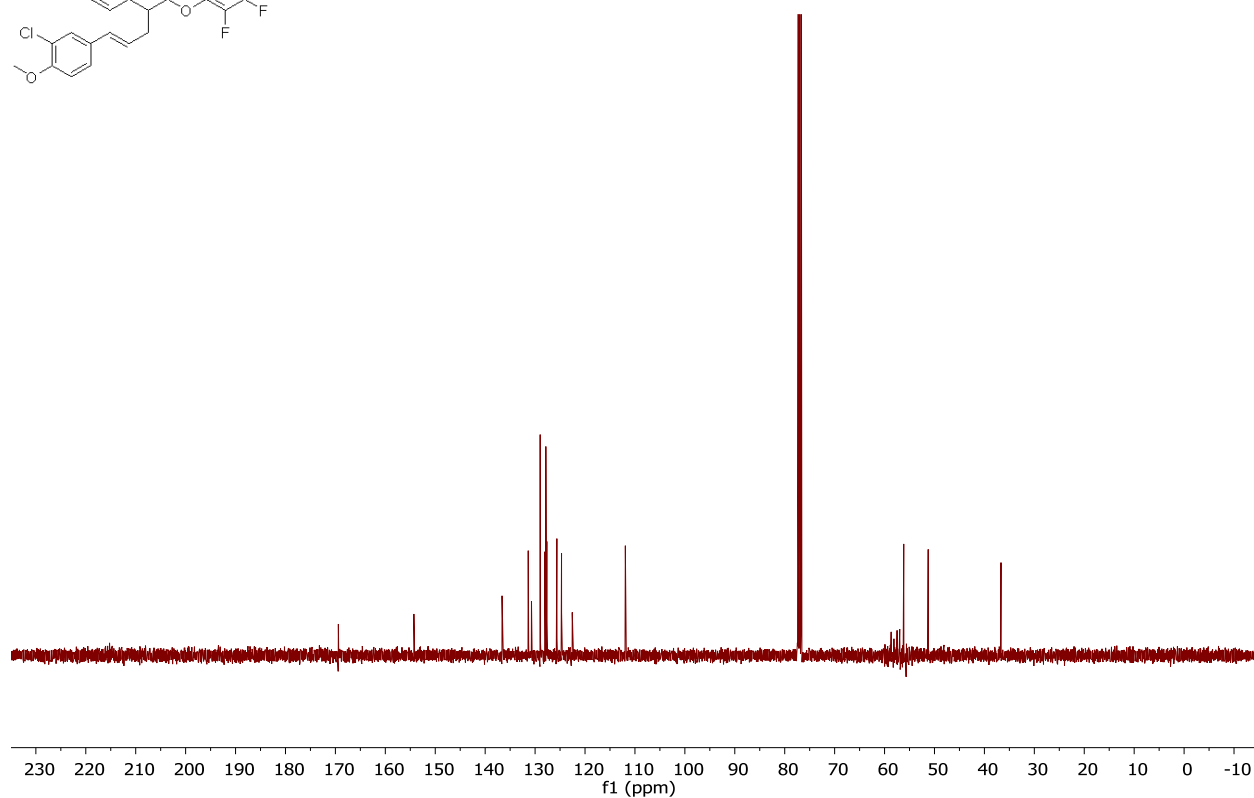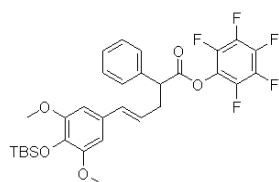

Pentafluorophenyl (E)-5-(4-((tert-butyldimethylsilyl)oxy)-3,5-dimethoxyphenyl)-2-phenylpent-4-enoate (22)

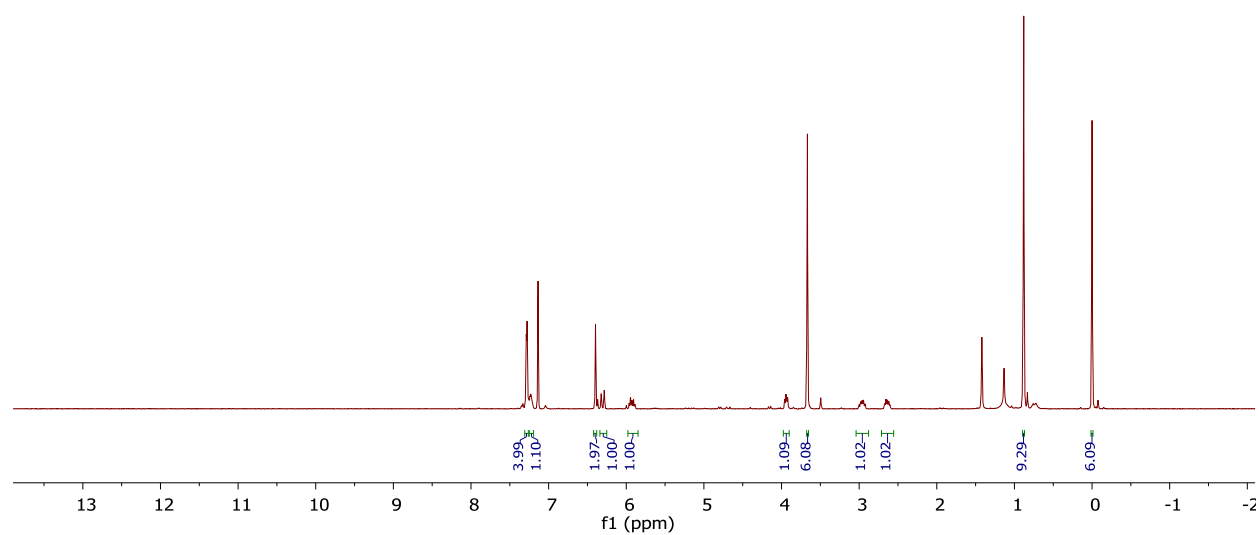

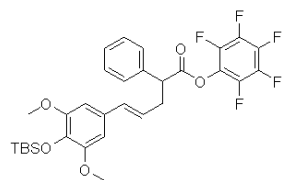

Pentafluorophenyl (E)-5-(4-((tert-butyldimethylsilyl)oxy)-3,5-dimethoxyphenyl)-2-phenylpent-4-enoate (22)

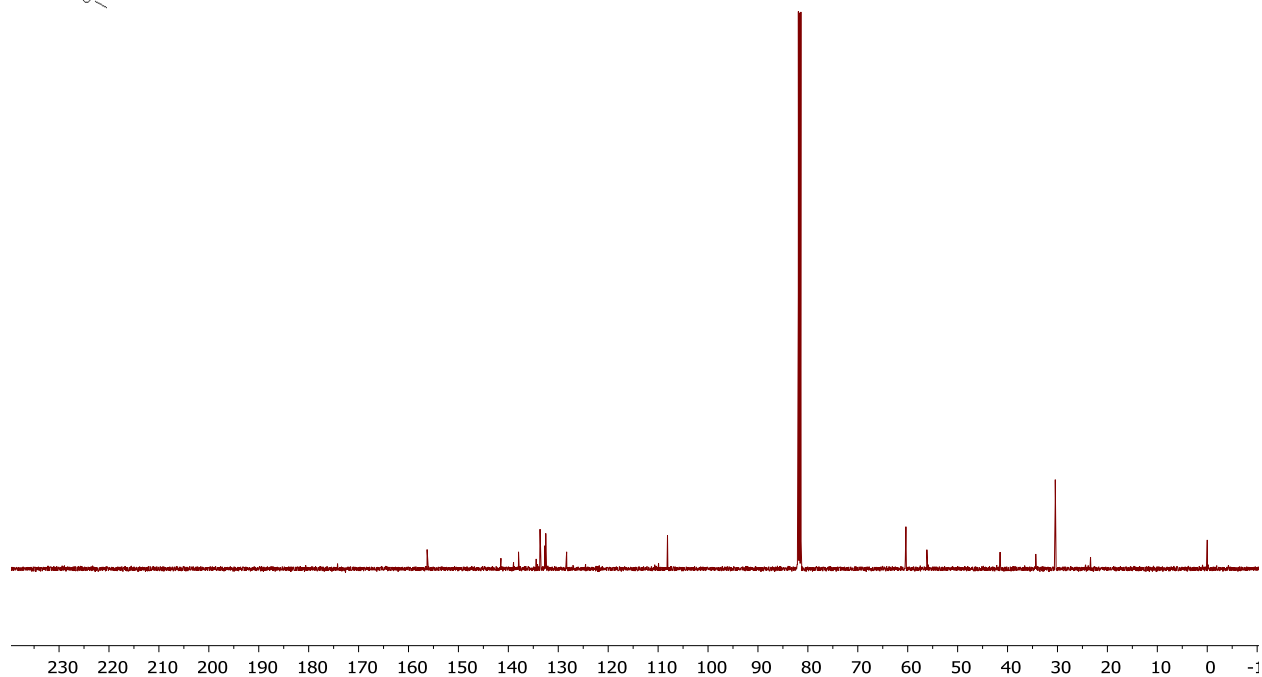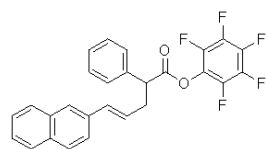

Pentafluorophenyl (E)-5-(naphthalen-2-yl)-2-phenylpent-4-enoate (23)

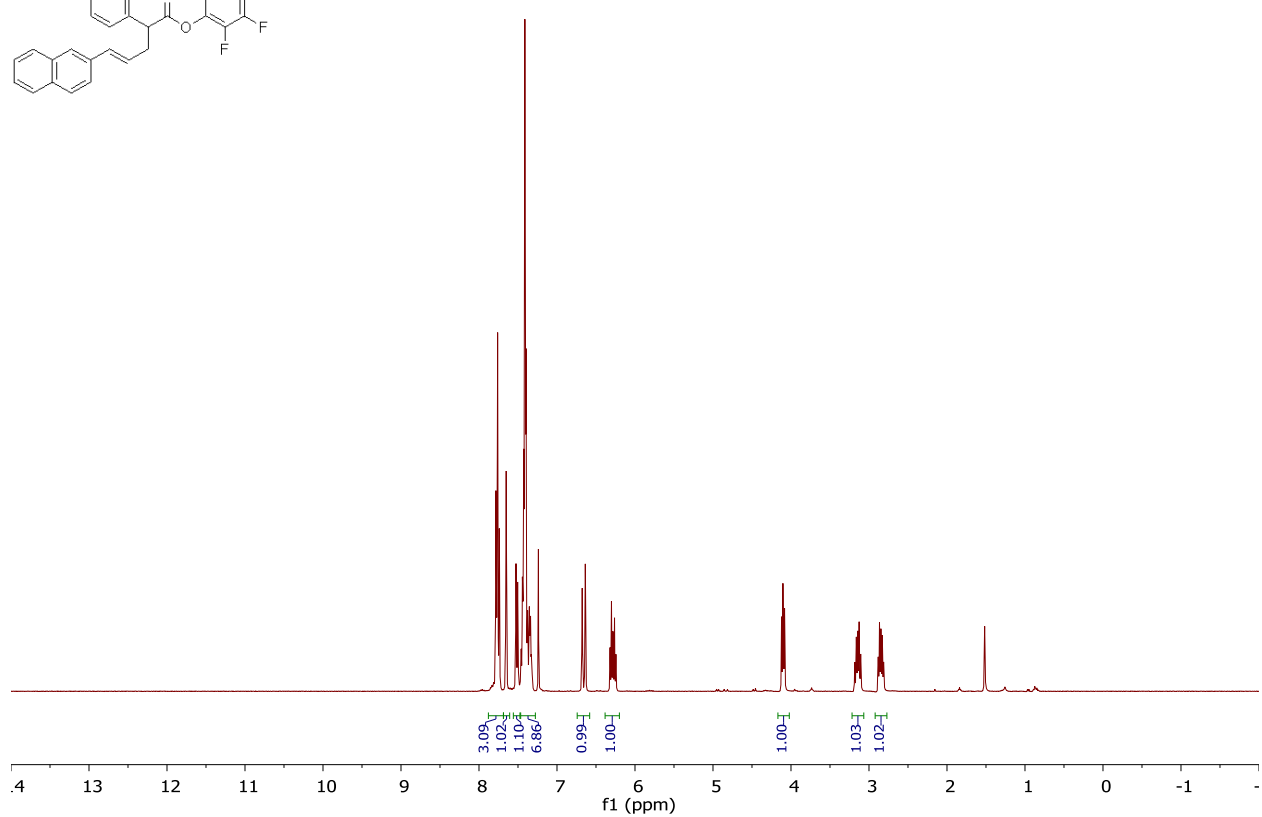

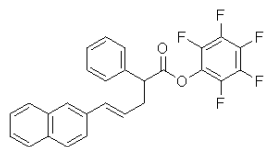

Pentafluorophenyl (E)-5-(naphthalen-2-yl)-2-phenylpent-4-enoate (23)

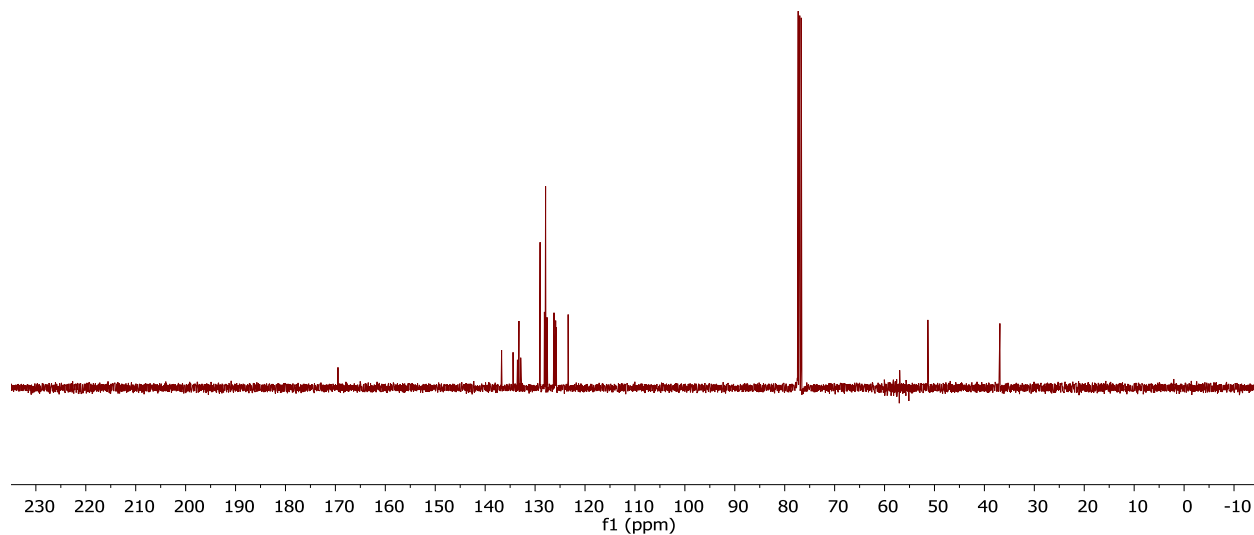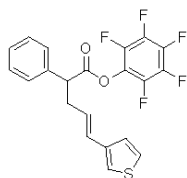

Pentafluorophenyl (E)-2-phenyl-5-(thiophen-3-yl)pent-4-enoate (24)

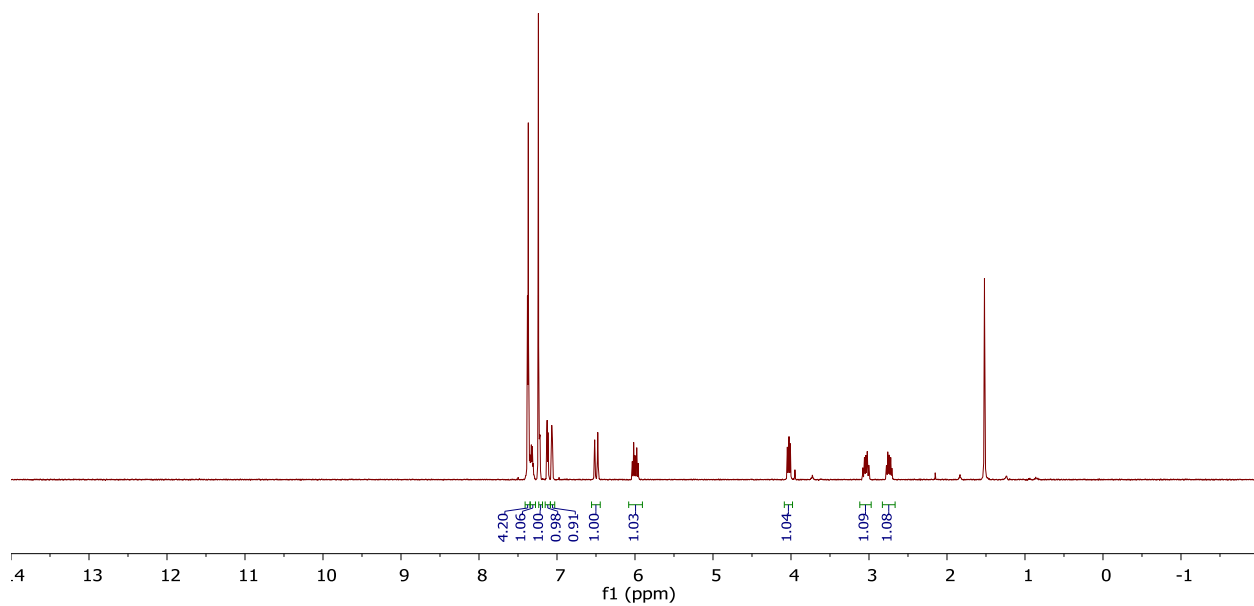

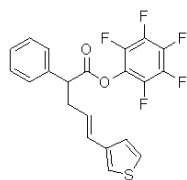

Pentafluorophenyl (E)-2-phenyl-5-(thiophen-3-yl)pent-4-enoate (24)

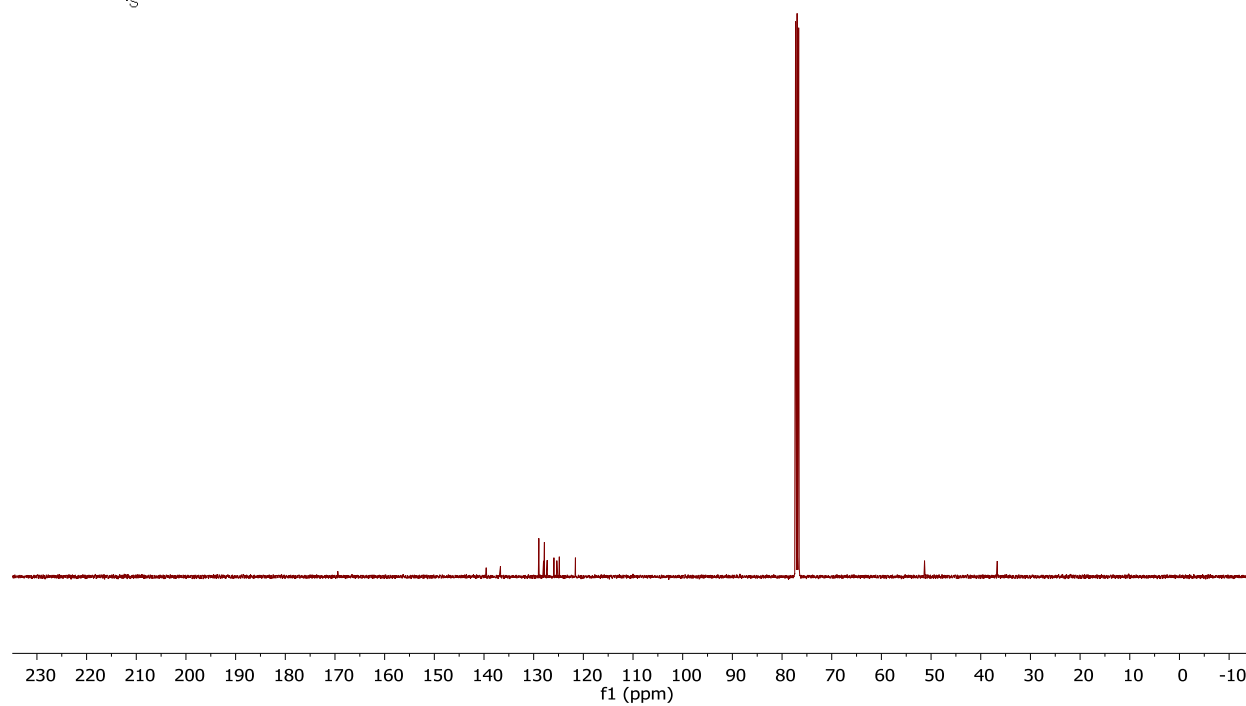

Supplement: Supplementary file 1 [file 4989079]
